# Supplementary material for: Catalyst- and additive-free three-component construction of isoxazolidinyl nucleosides and azoles via 1,3-dipolar cycloaddition
Source: Royal Society of Chemistry journal article supplement (doi:10.1039/d3nj05276a), 2024-01-01

# Supporting information

## Catalyst- and Additive-Free Three-Component Construction of Isoxazolidinyl Nucleosides and Azoles via 1,3-Dipolar Cycloaddition

Xinyufei Yuan,<sup>a</sup> Hang Gao,<sup>a</sup> Xing Li,<sup>\*,a</sup> Qin Zhang,<sup>b</sup> Wenwen Chen,<sup>\*,b</sup> and Hui Wang<sup>\*,b</sup>

<sup>a</sup> College of Biomedical Engineering, Taiyuan University of Technology, 79 West Yingze Street,  
Taiyuan 030024, People's Republic of China. [lixing@tyut.edu.cn](mailto:lixing@tyut.edu.cn)

<sup>b</sup> School of Chemistry and Material Science, Shanxi Normal University, 339, Taiyu Road, Taiyuan  
030000, People's Republic of China. [chenwenwen12@126.com](mailto:chenwenwen12@126.com) and [wanghui@sxnu.edu.cn](mailto:wanghui@sxnu.edu.cn)

| Contents                                                                     | Page no |
|------------------------------------------------------------------------------|---------|
| 1. General information                                                       | S-2     |
| 2. General procedures                                                        | S-3     |
| 3. Characterization data of substrate <b>3g</b>                              | S-3     |
| 4. Characterization data of products <b>4</b>                                | S-4     |
| 5. Characterization data of products <b>6</b>                                | S-12    |
| 6. Characterization data of products <b>8</b>                                | S-20    |
| 7. Characterization data of products <b>11</b>                               | S-23    |
| 8. References                                                                | S-24    |
| 9. <sup>1</sup> H-NMR and <sup>13</sup> C-NMR spectra of substrate <b>3g</b> | S-25    |
| 10. <sup>1</sup> H-NMR and <sup>13</sup> C-NMR spectra of products <b>4</b>  | S-26    |
| 11. <sup>1</sup> H-NMR and <sup>13</sup> C-NMR spectra of products <b>6</b>  | S-49    |
| 12. <sup>1</sup> H-NMR and <sup>13</sup> C-NMR spectra of products <b>8</b>  | S-72    |
| 13. <sup>1</sup> H-NMR and <sup>13</sup> C-NMR spectra of products <b>11</b> | S-81    |

## 1. General Information

Unless otherwise noted, all reagents and solvents obtained from commercial sources were used without further purification. Some reagents such as pyrimidines, purines, imidazoles, and triazoles were purchased from Sigma-aldrich, Alfa Aesar, J&K, TCI, Acros, Fluka, Energy, and Aladdin. Deuterated solvents were purchased from Sigma-Aldrich. Column chromatography was performed on silica gel (200–300 mesh) using petroleum ether /ethyl acetate/dichloromethane.  $^1\text{H}$  NMR spectra were taken on a Bruker AVANCE III 600 MHz NMR spectrometer. The chemical shifts are reported in ppm downfield to the  $\text{CDCl}_3$  resonance ( $\delta = 7.27$ ). Spectra are reported as follows: chemical shift ( $\delta$  ppm), multiplicity (s = singlet, d = doublet, t = triplet, q = quartet, m = multiplet), coupling constants (Hz), integration, and assignment.  $^{13}\text{C}\{^1\text{H}\}$  NMR data were collected at 150 MHz with complete proton decoupling. The chemical shifts are reported in ppm downfield to the central  $\text{CDCl}_3$  resonance ( $\delta = 77.0$ ). High-resolution mass spectra (HRMS) were performed on a micrOTOF-Q II instrument with an ESI source. Melting points were measured with a RD-II melting point apparatus and are uncorrected. Substrates such as diazo compounds **1**<sup>1</sup>, nitrosoarenes **2**<sup>2</sup>, N1-vinylpyrimidines **3**<sup>3</sup>, purine nucleobase acrylates **5**<sup>4</sup> and imidazole- or triazole-substituted acrylates **7**<sup>4a</sup> were synthesized according to the corresponding literature procedures. Among these starting materials, *tert*-butyl 2,6-dioxo-5-phenyl-3-vinyl-3,6-dihydropyrimidine-1(2*H*)-carboxylate (**3g**) is a new compound. Other starting materials are all known compounds and the analytical data ( $^1\text{H}$ NMR) matches with the literatures. In most reactions, only one single isomer (*cis*- or *endo*-) product were obtained and the other isomer (*trans*- or *exo*-) product cannot be observed. The structures of stereochemistry for these products have been mentioned clearly throughout in the manuscript and Supporting Information. Notably, only several reactions provided two isomeric products, and the diastereomeric mixture and the structures of stereochemistry have also been mentioned clearly throughout in the manuscript and Supporting Information.

## 2. General procedures

### 2.1 General procedure for the synthesis of isoxazolidinyl nucleosides and oxazoles via catalyst-free one-pot three-component cycloadditions of diazo compounds, nitrosoarenes and vinyl pyrimidines, or vinyl purines, or vinyl imidazoles, or vinyl triazoles

To a reaction system of nitrosoarene **2** (0.15 mmol, 1.5 equiv) and  $\alpha$ -diazo compound **1** (0.15 mmol, 1.5 equiv) in DCE (1.2 mL) was added alkene **3**, **5** or **7** (0.1 mmol) under air atmosphere. Subsequently, the resulting mixture was stirred under 70 °C (oil bath) and monitored by TLC. Upon completion of the consumption of the olefin **3**, **5** or **7**, the reaction mixture was directly purified by silica gel column chromatography without any treatment to give the desired cycloaddition products **4**, **6** and **8**.

### 2.2 3 mmol-Scale preparation of **4a**

To a round-bottom flask equipped with a magnetic stir bar were added nitrosobenzene **2a** (0.496 g, 4.5 mmol, 1.5 equiv), ethyl diazoacetate **1a** (0.521 g, 4.5 mmol, 1.5 equiv), Boc-protected N1-vinylthymine **3a** (0.757 g, 3 mmol) and DCE (25 mL) in turn. Subsequently, the reaction system was heated to 70 °C (oil bath) and stirred until Boc-protected N1-vinylthymine **3a** was completely consumed as determined by TLC. At last, the reaction mixture was concentrated in vacuum and then purified by silica gel column chromatography to give the desired product **4a** (1.068 g, 80% yield).

## 3. Characterization data of substrate **3g**

### *tert*-butyl 2,6-dioxo-5-phenyl-3-vinyl-3,6-dihydropyrimidine-1(2*H*)-carboxylate (**3g**)

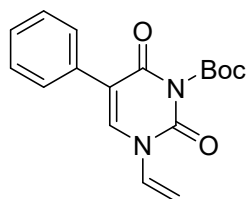

White solid, m.p. = 136–138 °C; <sup>1</sup>H NMR (600 MHz, CDCl<sub>3</sub>)  $\delta$  7.59 (s, 1H), 7.52 (d, *J* = 6.0 Hz,

2H), 7.43–7.36 (m, 3H), 7.26–7.21 (m, 1H), 5.19 (dd,  $J = 18.0, 6.0$  Hz, 1H), 5.03 (dd,  $J = 9.0, 6.0$  Hz, 1H), 1.62 (s, 9H) ppm;  $^{13}\text{C}$   $\{^1\text{H}\}$  NMR ( $\text{CDCl}_3$ , 150 MHz)  $\delta$  159.7, 147.5, 147.2, 135.3, 131.5, 129.7, 128.7, 128.7, 128.5, 116.4, 102.3, 87.3, 27.5 ppm; HRMS (ESI)  $m/z$ :  $[\text{M} + \text{H}]^+$  Calcd for  $\text{C}_{17}\text{H}_{19}\text{N}_2\text{O}_4^+$ , 315.1339; found, 315.1346.

#### 4. Characterization data of products 4

##### Ethyl 5-(3-(*tert*-butoxycarbonyl)-5-methyl-2,4-dioxo-3,4-dihydropyrimidin-1(2*H*)-yl)-2-phenylisoxazolidine-3-carboxylate (4a)

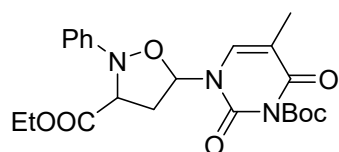

Yellow oil, Yield: 85% (37.8 mg);  $R_f = 0.30$  (PE/EA = 3:1, v/v);  $^1\text{H}$  NMR ( $\text{CDCl}_3$ , 400 MHz)  $\delta$  7.80 (s, 1H), 7.29–7.25 (m, 2H), 7.07–7.01 (m, 3H), 6.41 (dd,  $J = 7.8, 3.8$  Hz, 1H), 4.25–4.18 (m, 3H), 3.06–2.97 (m, 1H), 2.70 (dt,  $J = 14.0, 4.4$  Hz, 1H), 1.90 (s, 3H), 1.55 (s, 9H), 1.25 (t,  $J = 7.1$  Hz, 3H) ppm;  $^{13}\text{C}$   $\{^1\text{H}\}$  NMR ( $\text{CDCl}_3$ , 100 MHz)  $\delta$  170.3, 161.2, 148.8, 148.8, 147.8, 135.4, 129.2, 124.2, 115.9, 111.0, 86.8, 82.9, 67.0, 62.3, 38.7, 27.4, 14.0, 12.7 ppm; HRMS (ESI)  $m/z$ :  $[\text{M} + \text{H}]^+$  Calcd for  $\text{C}_{22}\text{H}_{28}\text{N}_3\text{O}_7^+$ , 446.1922; found, 446.1938.

##### Ethyl 5-(3-(*tert*-butoxycarbonyl)-5-ethyl-2,4-dioxo-3,4-dihydropyrimidin-1(2*H*)-yl)-2-phenylisoxazolidine-3-carboxylate (4b)

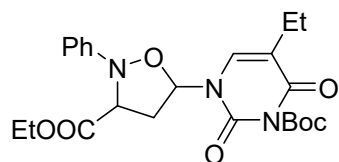

Yellow oil, Yield: 88% (40.4 mg);  $R_f = 0.30$  (PE/EA = 3:1, v/v);  $^1\text{H}$  NMR ( $\text{CDCl}_3$ , 400 MHz)  $\delta$  7.85 (s, 1H), 7.37–7.32 (m, 2H), 7.15–7.09 (m, 3H), 6.51 (dd,  $J = 7.8, 3.9$  Hz, 1H), 4.32–4.26 (m, 3H), 3.12–3.03 (m, 1H), 2.77 (dt,  $J = 14.0, 4.4$  Hz, 1H), 2.38 (q,  $J = 7.4$  Hz, 2H), 1.62 (s, 9H), 1.32 (t,  $J = 7.1$  Hz, 3H), 1.18 (t,  $J = 7.4$  Hz, 3H) ppm;  $^{13}\text{C}$   $\{^1\text{H}\}$  NMR ( $\text{CDCl}_3$ , 100 MHz)  $\delta$  170.3, 160.8, 148.8, 148.8, 147.9, 134.8, 129.2, 124.2, 116.8, 116.0, 86.8, 82.9, 67.1, 62.3, 38.4, 27.4, 20.3, 14.0, 12.5 ppm; HRMS (ESI)  $m/z$ :  $[\text{M} + \text{H}]^+$  Calcd for  $\text{C}_{23}\text{H}_{30}\text{N}_3\text{O}_7^+$ , 460.2078; found, 460.2080.

##### Ethyl 5-(3-(*tert*-butoxycarbonyl)-5-fluoro-2,4-dioxo-3,4-dihydropyrimidin-1(2*H*)-yl)-2-phenylisoxazolidine-3-carboxylate (4c)

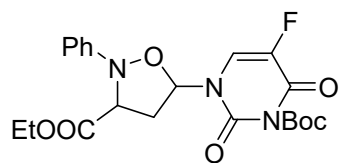

Yellow oil, Yield: 77% (34.6 mg);  $R_f = 0.35$  (PE/EA = 3:1, v/v);  $^1\text{H}$  NMR ( $\text{CDCl}_3$ , 400 MHz)  $\delta$  8.23 (d,  $J = 6.3$  Hz, 1H), 7.38–7.33 (m, 2H), 7.16–7.11 (m, 3H), 6.45 (dd,  $J = 7.6, 2.0$  Hz, 1H), 4.27 (q,  $J = 7.1$  Hz, 2H), 4.21 (dd,  $J = 9.8, 5.0$  Hz, 1H) 3.21–3.12 (m, 1H), 2.84–2.77 (m, 1H),

1.62 (s, 9H), 1.32 (t,  $J = 7.1$  Hz, 3H) ppm;  $^{13}\text{C}\{^1\text{H}\}$  (CDCl<sub>3</sub>, 100 MHz)  $\delta$  170.1, 154.6 (d,  $J = 28.1$  Hz), 148.3, 147.3, 146.4, 141.2, 138.8, 129.2, 124.7 (d,  $J = 32.8$  Hz), 116.4, 87.8, 83.4, 66.7, 62.5, 39.4, 27.4, 14.0 ppm; HRMS (ESI)  $m/z$ :  $[\text{M} + \text{H}]^+$  Calcd for C<sub>21</sub>H<sub>25</sub>FN<sub>3</sub>O<sub>7</sub><sup>+</sup>, 450.1671; found, 450.1678.

**Ethyl 5-(3-(*tert*-butoxycarbonyl)-5-chloro-2,4-dioxo-3,4-dihydropyrimidin-1(2*H*)-yl)-2-phenylisoxazolidine-3-carboxylate (4d)**

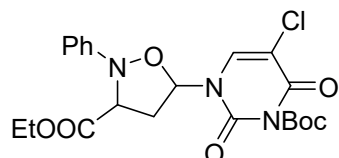

Yellow oil, Yield: 90% (41.9 mg);  $R_f = 0.30$  (PE/EA = 3:1, v/v);  $^1\text{H}$  NMR (CDCl<sub>3</sub>, 400 MHz)  $\delta$  8.31 (s, 1H), 7.39–7.34 (m, 2H), 7.17–7.12 (m, 3H), 6.44 (dd,  $J = 7.5, 2.9$  Hz, 1H), 4.27 (q,  $J = 7.2$  Hz, 2H), 4.22 (dd,  $J = 9.8, 4.8$  Hz, 1H), 3.22–3.13 (m, 1H), 2.87–2.81 (m, 1H), 1.62 (s, 9H), 1.32 (t,  $J = 7.1$  Hz, 3H) ppm;  $^{13}\text{C}\{^1\text{H}\}$  NMR (CDCl<sub>3</sub>, 100 MHz)  $\delta$  170.0, 156.6, 148.4, 147.8, 146.6, 137.0, 129.2, 124.6, 116.4, 108.9, 87.7, 83.7, 66.7, 62.6, 39.7, 27.4, 14.0 ppm; HRMS (ESI)  $m/z$ :  $[\text{M} + \text{H}]^+$  Calcd for C<sub>21</sub>H<sub>25</sub>ClN<sub>3</sub>O<sub>7</sub><sup>+</sup>, 466.1376; found, 466.1373.

**Ethyl 5-(5-bromo-3-(*tert*-butoxycarbonyl)-2,4-dioxo-3,4-dihydropyrimidin-1(2*H*)-yl)-2-phenylisoxazolidine-3-carboxylate (4e)**

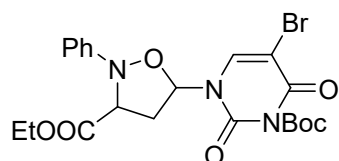

Yellow oil, Yield: 85% (43.4 mg);  $R_f = 0.30$  (PE/EA = 3:1, v/v);  $^1\text{H}$  NMR (CDCl<sub>3</sub>, 400 MHz)  $\delta$  8.40 (s, 1H), 7.39–7.34 (m, 2H), 7.17–7.12 (m, 3H), 6.43 (dd,  $J = 7.5, 2.9$  Hz, 1H), 4.27 (q,  $J = 7.2$  Hz, 2H), 4.22 (dd,  $J = 9.8, 4.8$  Hz, 1H), 3.22–3.13 (m, 1H), 2.88–2.81 (m, 1H), 1.62 (s, 9H), 1.32 (t,  $J = 7.2$  Hz, 3H) ppm;  $^{13}\text{C}\{^1\text{H}\}$  NMR (CDCl<sub>3</sub>, 100 MHz)  $\delta$  170.0, 156.5, 148.4, 148.1, 146.7, 139.6, 129.2, 124.6, 116.4, 96.4, 87.7, 83.8, 66.8, 62.6, 39.7, 27.4, 14.1 ppm; HRMS (ESI)  $m/z$ :  $[\text{M} + \text{H}]^+$  Calcd for C<sub>21</sub>H<sub>25</sub>BrN<sub>3</sub>O<sub>7</sub><sup>+</sup>, 510.0870; found, 510.0861.

**Ethyl 5-(3-(*tert*-butoxycarbonyl)-5-iodo-2,4-dioxo-3,4-dihydropyrimidin-1(2*H*)-yl)-2-phenylisoxazolidine-3-carboxylate (4f)**

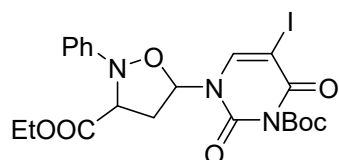

Yellow oil, Yield: 82% (45.7 mg);  $R_f = 0.30$  (PE/EA = 3:1, v/v);  $^1\text{H}$  NMR (CDCl<sub>3</sub>, 400 MHz)  $\delta$  8.47 (s, 1H), 7.39–7.34 (m, 2H), 7.17–7.12 (m, 3H), 6.42 (dd,  $J = 7.5, 2.9$  Hz, 1H), 4.28 (q,  $J = 7.2$  Hz, 2H), 4.23 (dd,  $J = 9.8, 4.7$  Hz, 1H), 3.20–3.11 (m, 1H), 2.87–2.81 (m, 1H), 1.61 (s, 9H), 1.33 (t,  $J = 7.1$  Hz, 3H) ppm;  $^{13}\text{C}\{^1\text{H}\}$  NMR (CDCl<sub>3</sub>, 100 MHz)  $\delta$  170.0, 157.4, 148.5, 148.4, 146.7, 144.6, 129.2, 124.6, 116.4, 87.6, 83.7, 66.8, 62.6, 39.6, 27.3, 14.1 ppm; HRMS (ESI)  $m/z$ :  $[\text{M} + \text{H}]^+$  Calcd for C<sub>21</sub>H<sub>25</sub>IN<sub>3</sub>O<sub>7</sub><sup>+</sup>, 558.0732; found, 558.0729.

**Ethyl 5-(3-(*tert*-butoxycarbonyl)-2,4-dioxo-5-phenyl-3,4-dihydropyrimidin-1(2*H*)-yl)-2-phenylisoxazolidine-3-carboxylate (4g)**

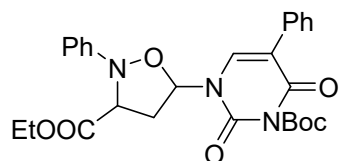

Yellow oil, Yield: 88% (44.7 mg);  $R_f = 0.30$  (PE/EA = 3:1, v/v);  $^1\text{H NMR}$  ( $\text{CDCl}_3$ , 400 MHz)  $\delta$  8.25 (s, 1H), 7.61–7.57 (m, 2H), 7.41–7.32 (m, 2H), 7.15–7.11 (m, 3H), 6.54 (dd,  $J = 7.6, 3.3$  Hz, 1H), 4.31–4.21 (m, 3H), 3.20–3.11 (m, 1H), 2.94–2.86 (m, 1H), 1.63 (s, 9H), 1.23 (t,  $J = 7.2$  Hz, 3H) ppm;  $^{13}\text{C}\{^1\text{H}\}$  NMR ( $\text{CDCl}_3$ , 100 MHz)  $\delta$  170.1, 159.7, 148.7, 148.4, 147.7, 137.0, 132.0, 129.2, 128.5, 128.2, 128.1, 124.4, 116.2, 115.2, 87.1, 83.4, 66.9, 62.4, 39.2, 27.4, 13.9 ppm; HRMS (ESI)  $m/z$ :  $[\text{M} + \text{H}]^+$  Calcd for  $\text{C}_{27}\text{H}_{30}\text{N}_3\text{O}_7^+$ , 508.2078; found, 508.2078.

**Ethyl 5-(4-((*di**tert*-butoxycarbonyl)amino)-2-oxopyrimidin-1(2*H*)-yl)-2-phenylisoxazolidine-3-carboxylate (4h)**

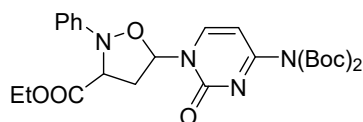

Yellow oil, Yield: 72% (38.2 mg);  $R_f = 0.25$  (PE/EA = 3:1, v/v);  $^1\text{H NMR}$  ( $\text{CDCl}_3$ , 400 MHz)  $\delta$  8.24 (d,  $J = 7.6$  Hz, 1H), 7.38–7.33 (m, 2H), 7.12 (t,  $J = 8.5$  Hz, 4H), 6.39 (dd,  $J = 7.2, 2.3$  Hz, 1H), 4.23–4.17 (m, 3H), 3.31–3.22 (m, 1H), 2.90–2.84 (m, 1H), 1.57 (s, 18H), 1.25 (t,  $J = 7.2$  Hz, 3H) ppm;  $^{13}\text{C}\{^1\text{H}\}$  NMR ( $\text{CDCl}_3$ , 100 MHz)  $\delta$  170.0, 162.6, 154.5, 149.5, 148.9, 144.0, 129.1, 124.2, 116.2, 95.9, 85.0, 84.9, 66.5, 62.2, 40.6, 27.7, 14.0 ppm; HRMS (ESI)  $m/z$ :  $[\text{M} + \text{H}]^+$  Calcd for  $\text{C}_{26}\text{H}_{35}\text{N}_4\text{O}_8^+$ , 531.2449; found, 531.2457.

**dr (*cis*-4i/*trans*-4i) = 2:1**

**Ethyl 5-(3-(*tert*-butoxycarbonyl)-5-methyl-2,4-dioxo-3,4-dihydropyrimidin-1(2*H*)-yl)-2-(*o*-tolyl)isoxazolidine-3-carboxylate (*cis*-4i)**

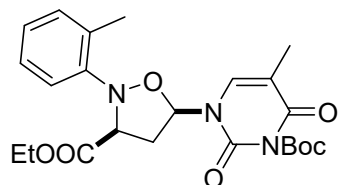

Yellow oil, Yield: 53% (24.5 mg);  $R_f = 0.22$  (PE/EA = 3:1, v/v); dr (*trans*/*cis*) = 2:1,  $^1\text{H NMR}$  ( $\text{CDCl}_3$ , 400 MHz)  $\delta$  8.10 (d,  $J = 1.2$  Hz, 1H), 7.36 (d,  $J = 7.8$  Hz, 1H), 7.25–7.17 (m, 3H), 6.49 (dd,  $J = 7.8, 3.6$  Hz, 1H), 4.20 (dd,  $J = 9.0, 6.6$  Hz, 1H), 4.15 (q,  $J = 7.2$  Hz, 2H), 3.30–3.25 (m, 1H), 2.84–2.80 (m, 1H), 2.37 (s, 3H), 1.99 (s, 3H), 1.61 (s, 9H), 1.20 (t,  $J = 7.2$  Hz, 3H) ppm;  $^{13}\text{C}\{^1\text{H}\}$  NMR ( $\text{CDCl}_3$ , 150 MHz)  $\delta$  169.3, 161.4, 149.0, 148.0, 145.1, 136.1, 134.4, 131.4, 127.8, 126.9, 120.5, 110.6, 86.9, 83.1, 66.6, 62.1, 40.7, 27.6, 18.3, 14.1, 12.8 ppm; HRMS (ESI)  $m/z$ :  $[\text{M} + \text{H}]^+$  Calcd for  $\text{C}_{23}\text{H}_{30}\text{N}_3\text{O}_7^+$ , 460.2078; found, 460.2075.

**Ethyl-5-(3-(*tert*-butoxycarbonyl)-5-methyl-2,4-dioxo-3,4-dihydropyrimidin-1(2*H*)-yl)-2-(*o*-tolyl)isoxazolidine-3-carboxylate (*trans*-4i)**

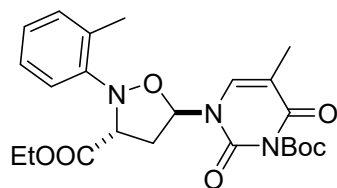

Yellow oil, Yield: 27% (12.3 mg);  $R_f = 0.20$  (PE/EA = 3:1, v/v);  $^1\text{H NMR}$  ( $\text{CDCl}_3$ , 600 MHz)  $\delta$  7.48 (d,  $J = 1.2$  Hz, 1H), 7.39 (d,  $J = 7.8$  Hz, 1H), 7.19 (d,  $J = 7.2$  Hz, 2H), 7.13–7.10 (m, 1H), 6.47 (dd,  $J = 7.8, 3.6$  Hz, 1H), 4.51 (dd,  $J = 7.8, 1.8$  Hz, 1H), 3.85–3.76 (m, 2H), 3.39–3.35 (m, 1H), 2.76–2.71 (m, 1H), 2.31 (s, 3H), 1.90 (s, 3H), 1.61 (s, 9H), 0.84 (t,  $J = 7.2$  Hz, 3H) ppm;  $^{13}\text{C}\{^1\text{H}\}$  NMR ( $\text{CDCl}_3$ , 150 MHz)  $\delta$  168.3, 148.8, 148.0, 143.8, 134.8, 130.7, 126.6, 126.1, 118.9, 110.6, 87.0, 83.2, 63.6, 61.2, 40.9, 29.8, 27.6, 18.4, 13.7, 12.9 ppm; HRMS (ESI)  $m/z$ :  $[\text{M} + \text{H}]^+$  Calcd for  $\text{C}_{23}\text{H}_{30}\text{N}_3\text{O}_7^+$ , 460.2078; found, 460.2075.

**Ethyl 5-(3-(tert-butoxycarbonyl)-5-methyl-2,4-dioxo-3,4-dihydropyrimidin-1(2H)-yl)-2-(m-tolyl)isoxazolidine-3-carboxylate (4j)**

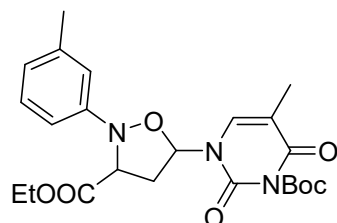

Yellow oil, Yield: 86% (39.5 mg);  $R_f = 0.20$  (PE/EA = 3:1, v/v);  $^1\text{H NMR}$  ( $\text{CDCl}_3$ , 400 MHz)  $\delta$  7.80 (d,  $J = 1.2$  Hz, 1H), 7.15 (t,  $J = 7.8$  Hz, 1H), 6.87–6.83 (m, 3H), 6.40 (dd,  $J = 7.8, 3.8$  Hz, 1H), 4.25–4.16 (m, 3H), 3.06–2.98 (m, 1H), 2.74–2.67 (m, 1H), 2.28 (s, 3H), 1.90 (d,  $J = 1.2$  Hz, 3H), 1.54 (s, 9H), 1.25 (t,  $J = 7.2$  Hz, 3H) ppm;  $^{13}\text{C}\{^1\text{H}\}$  NMR ( $\text{CDCl}_3$ , 100 MHz)  $\delta$  170.4, 161.2, 148.8, 148.8, 147.8, 139.2, 135.5, 129.0, 125.1, 116.7, 113.0, 110.9, 86.8, 83.0, 66.9, 62.3, 38.9, 27.4, 21.6, 14.0, 12.7 ppm; HRMS (ESI)  $m/z$ :  $[\text{M} + \text{H}]^+$  Calcd for  $\text{C}_{23}\text{H}_{30}\text{N}_3\text{O}_7^+$ , 460.2078; found, 460.2075.

**Ethyl 5-(3-(tert-butoxycarbonyl)-5-methyl-2,4-dioxo-3,4-dihydropyrimidin-1(2H)-yl)-2-(p-tolyl)isoxazolidine-3-carboxylate (4k)**

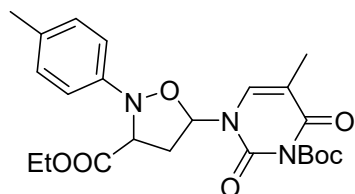

Yellow oil, Yield: 88% (40.4 mg);  $R_f = 0.20$  (PE/EA = 3:1, v/v);  $^1\text{H NMR}$  ( $\text{CDCl}_3$ , 400 MHz)  $\delta$  7.81 (d,  $J = 1.2$  Hz, 1H), 7.06 (d,  $J = 8.1$  Hz, 2H), 6.96 (d,  $J = 8.6$  Hz, 2H), 6.37 (dd,  $J = 7.8, 3.8$  Hz, 1H), 4.17 (q,  $J = 7.2$  Hz, 2H), 4.12 (dd,  $J = 9.5, 5.3$  Hz, 1H), 3.08–2.99 (m, 1H), 2.73–2.66 (m, 1H), 2.25 (s, 3H), 1.90 (d,  $J = 1.2$  Hz, 3H), 1.54 (s, 9H), 1.23 (t,  $J = 7.2$  Hz, 3H) ppm;  $^{13}\text{C}\{^1\text{H}\}$  NMR ( $\text{CDCl}_3$ , 100 MHz)  $\delta$  170.2, 161.2, 148.8, 147.8, 146.2, 135.5, 134.3, 129.7, 116.6, 110.9, 86.8, 82.9, 67.2, 62.2, 39.1, 27.4, 14.0, 12.7 ppm; HRMS (ESI)  $m/z$ :  $[\text{M} + \text{H}]^+$  Calcd for  $\text{C}_{23}\text{H}_{30}\text{N}_3\text{O}_7^+$ , 460.2078; found, 460.2075.

dr (*cis*-4n/*trans*-4n) = 2:1

Ethyl 5-(3-(*tert*-butoxycarbonyl)-5-methyl-2,4-dioxo-3,4-dihydropyrimidin-1(2*H*)-yl)-2-(2-chlorophenyl)isoxazolidine-3-carboxylate (*cis*-4n)

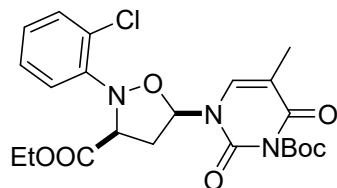

Yellow oil, Yield: 55% (26.3 mg);  $R_f = 0.25$  (PE/EA = 3:1, v/v); dr (*trans*/*cis*) = 2:1,  $^1\text{H}$  NMR ( $\text{CDCl}_3$ , 400 MHz)  $\delta$  8.06 (d,  $J = 1.2$  Hz, 1H), 7.46 (dd,  $J = 8.4, 1.8$  Hz, 1H), 7.38 (dd,  $J = 7.8, 1.2$  Hz, 1H), 7.32–7.29 (m, 1H), 7.20–7.17 (m, 1H), 6.55 (dd,  $J = 7.8, 3.6$  Hz, 1H), 4.37 (dd,  $J = 9.0, 5.4$  Hz, 1H), 4.16 (q,  $J = 7.2$  Hz, 2H), 3.21–3.16 (m, 1H), 2.85–2.81 (m, 1H), 1.98 (s, 3H), 1.61 (s, 9H), 1.18 (t,  $J = 6.6$  Hz, 3H) ppm;  $^{13}\text{C}\{^1\text{H}\}$  NMR ( $\text{CDCl}_3$ , 150 MHz)  $\delta$  169.0, 161.4, 149.0, 148.0, 144.3, 135.9, 130.7, 128.0, 127.9, 121.2, 110.8, 87.0, 86.9, 83.6, 66.5, 62.2, 39.7, 27.6, 14.0, 12.8 ppm; HRMS (ESI)  $m/z$ :  $[\text{M} + \text{H}]^+$  Calcd for  $\text{C}_{22}\text{H}_{27}\text{ClN}_3\text{O}_7^+$ , 480.1532; found, 480.1529.

Ethyl (3*S*,5*S*)-5-(3-(*tert*-butoxycarbonyl)-5-methyl-2,4-dioxo-3,4-dihydropyrimidin-1(2*H*)-yl)-2-(2-chlorophenyl)isoxazolidine-3-carboxylate (*trans*-4n)

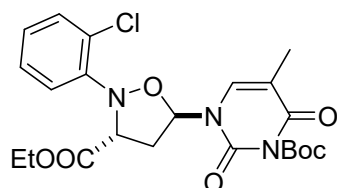

Yellow oil, Yield: 27% (13.1 mg);  $R_f = 0.26$  (PE/EA = 3:1, v/v);  $^1\text{H}$  NMR ( $\text{CDCl}_3$ , 600 MHz)  $\delta$  7.55 (d,  $J = 1.2$  Hz, 1H), 7.44 (dd,  $J = 7.8, 1.2$  Hz, 1H), 7.38 (dd,  $J = 8.4, 1.8$  Hz, 1H), 7.27–7.24 (m, 1H), 7.14–7.11 (m, 1H), 6.59 (dd,  $J = 7.8, 3.6$  Hz, 1H), 5.03 (d,  $J = 7.8$  Hz, 1H), 3.86–3.80 (m, 2H), 3.38–3.34 (m, 1H), 2.76–2.72 (m, 1H), 1.92 (s, 3H), 1.61 (s, 9H), 0.85 (t,  $J = 7.2$  Hz, 3H) ppm;  $^{13}\text{C}\{^1\text{H}\}$  NMR ( $\text{CDCl}_3$ , 150 MHz)  $\delta$  168.1, 161.4, 148.8, 148.0, 142.5, 134.9, 127.5, 124.8, 120.4, 111.2, 87.0, 82.3, 63.1, 61.3, 40.1, 27.6, 13.8, 12.9 ppm; HRMS (ESI)  $m/z$ :  $[\text{M} + \text{H}]^+$  Calcd for  $\text{C}_{22}\text{H}_{27}\text{ClN}_3\text{O}_7^+$ , 480.1532; found, 480.1529.

Ethyl 5-(3-(*tert*-butoxycarbonyl)-5-methyl-2,4-dioxo-3,4-dihydropyrimidin-1(2*H*)-yl)-2-(3-chlorophenyl)isoxazolidine-3-carboxylate (4o)

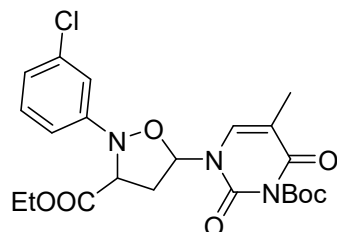

Yellow oil, Yield: 83% (39.8 mg);  $R_f = 0.25$  (PE/EA = 3:1, v/v);  $^1\text{H}$  NMR ( $\text{CDCl}_3$ , 400 MHz)  $\delta$  7.72 (d,  $J = 1.2$  Hz, 1H), 7.19 (t,  $J = 8.1$  Hz, 1H), 7.05 (t,  $J = 2.1$  Hz, 1H), 7.01–6.98 (m, 1H), 6.93–6.90 (m, 1H), 6.40 (dd,  $J = 7.7, 3.9$  Hz, 1H), 4.26–4.16 (m, 3H), 3.07–2.98 (m, 1H), 2.72 (dt,  $J = 14.0, 4.4$  Hz, 1H), 1.92 (d,  $J = 1.1$  Hz, 3H), 1.54 (s, 9H), 1.26 (t,  $J = 7.1$  Hz, 3H) ppm;



$^{13}\text{C}\{^1\text{H}\}$  NMR ( $\text{CDCl}_3$ , 100 MHz)  $\delta$  170.0, 161.1, 150.0, 148.8, 147.7, 135.2, 130.3, 124.0, 116.0, 113.8, 111.1, 86.9, 83.0, 66.7, 62.5, 38.5, 27.4, 14.0, 12.7 ppm; HRMS (ESI)  $m/z$ :  $[\text{M} + \text{H}]^+$  Calcd for  $\text{C}_{22}\text{H}_{27}\text{ClN}_3\text{O}_7^+$ , 480.1532; found, 480.1535.

**Ethyl 5-(3-(*tert*-butoxycarbonyl)-5-methyl-2,4-dioxo-3,4-dihydropyrimidin-1(2*H*)-yl)-2-(4-chlorophenyl)isoxazolidine-3-carboxylate (4p)**

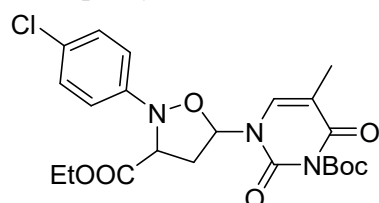

Yellow oil, Yield: 87% (41.7 mg);  $R_f$  = 0.25 (PE/EA = 3:1, v/v);  $^1\text{H}$  NMR ( $\text{CDCl}_3$ , 400 MHz)  $\delta$  7.75 (d,  $J$  = 1.2 Hz, 1H), 7.21 (d,  $J$  = 9.0 Hz, 1H), 6.98 (d,  $J$  = 9.0 Hz, 2H), 6.40 (dd,  $J$  = 7.8, 4.0 Hz, 1H), 4.19 (q,  $J$  = 7.1 Hz, 2H), 4.13 (dd,  $J$  = 9.6, 5.0 Hz, 1H), 3.07–2.98 (m, 1H), 2.76–2.69 (m, 1H), 1.90 (d,  $J$  = 1.2 Hz, 3H), 1.54 (s, 9H), 1.24 (t,  $J$  = 7.1 Hz, 3H), ppm;  $^{13}\text{C}\{^1\text{H}\}$  NMR ( $\text{CDCl}_3$ , 100 MHz)  $\delta$  170.0, 161.1, 148.8, 147.7, 147.4, 135.2, 129.5, 129.2, 117.4, 111.1, 86.9, 82.9, 67.0, 62.5, 38.6, 27.4, 14.0, 12.7 ppm; HRMS (ESI)  $m/z$ :  $[\text{M} + \text{H}]^+$  Calcd for  $\text{C}_{22}\text{H}_{27}\text{ClN}_3\text{O}_7^+$ , 480.1532; found, 480.1540.

**Ethyl 5-(3-(*tert*-butoxycarbonyl)-5-methyl-2,4-dioxo-3,4-dihydropyrimidin-1(2*H*)-yl)-2-(4-fluorophenyl)isoxazolidine-3-carboxylate (4q)**

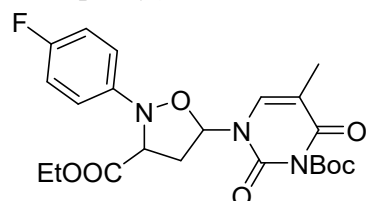

Yellow oil, Yield: 72% (33.3 mg);  $R_f$  = 0.20 (PE/EA = 3:1, v/v);  $^1\text{H}$  NMR ( $\text{CDCl}_3$ , 600 MHz)  $\delta$  7.86 (d,  $J$  = 1.2 Hz, 1H), 7.14–7.12 (m, 2H), 7.05–7.02 (m, 2H), 6.48 (dd,  $J$  = 7.8, 3.6 Hz, 1H), 4.27 (q,  $J$  = 7.2 Hz, 2H), 4.16 (dd,  $J$  = 9.0, 5.4 Hz, 1H), 3.17–3.12 (m, 1H), 2.81–2.77 (m, 1H), 1.98 (s, 3H), 1.61 (s, 9H), 1.30 (t,  $J$  = 7.2 Hz, 3H) ppm;  $^{13}\text{C}\{^1\text{H}\}$  NMR ( $\text{CDCl}_3$ , 150 MHz)  $\delta$  170.0, 161.3, 160.9, 159.3, 149.0, 147.9, 144.8, 135.5, 118.9, 116.2, 116.0, 111.2, 87.1, 83.0, 67.7, 62.5, 39.5, 27.6, 14.2, 12.9 ppm; HRMS (ESI)  $m/z$ :  $[\text{M} + \text{H}]^+$  Calcd for  $\text{C}_{22}\text{H}_{27}\text{FN}_3\text{O}_7^+$ , 464.1828; found, 464.1825.

**Ethyl 5-(3-(*tert*-butoxycarbonyl)-5-methyl-2,4-dioxo-3,4-dihydropyrimidin-1(2*H*)-yl)-2-(3,4-dimethylphenyl)isoxazolidine-3-carboxylate (4r)**

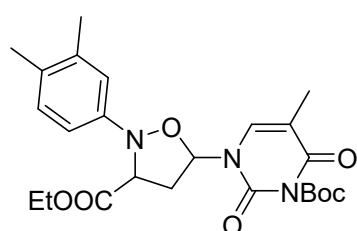

Yellow oil, Yield: 72% (34.1 mg);  $R_f$  = 0.20 (PE/EA = 3:1, v/v);  $^1\text{H}$  NMR ( $\text{CDCl}_3$ , 400 MHz)  $\delta$  7.82 (d,  $J$  = 1.1 Hz, 1H), 7.01 (d,  $J$  = 8.2 Hz, 1H), 6.86 (d,  $J$  = 2.1 Hz, 1H), 6.78 (dd,  $J$  = 8.1, 2.4

Hz, 1H), 6.38 (dd,  $J = 7.8, 3.7$  Hz, 1H), 4.18 (q,  $J = 7.0$  Hz, 2H), 4.12 (dd,  $J = 9.5, 5.3$  Hz, 1H), 3.08–3.00 (m, 1H), 2.72–2.65 (m, 1H), 2.19 (s, 3H), 2.15 (s, 3H), 1.90 (d,  $J = 1.0$  Hz, 3H), 1.54 (s, 9H), 1.24 (t,  $J = 7.2$  Hz, 3H) ppm;  $^{13}\text{C}\{^1\text{H}\}$  NMR ( $\text{CDCl}_3$ , 100 MHz)  $\delta$  170.3, 161.2, 148.8, 147.8, 146.5, 137.6, 135.6, 133.0, 130.2, 118.1, 113.9, 110.8, 86.8, 82.9, 67.1, 62.2, 39.3, 27.4, 20.1, 19.1, 14.0, 12.7 ppm; HRMS (ESI)  $m/z$ :  $[\text{M} + \text{H}]^+$  Calcd for  $\text{C}_{24}\text{H}_{32}\text{N}_3\text{O}_7^+$ , 474.2235; found, 474.2205.

**Ethyl 5-(3-(*tert*-butoxycarbonyl)-5-methyl-2,4-dioxo-3,4-dihydropyrimidin-1(2*H*)-yl)-2-(3,5-dichlorophenyl)isoxazolidine-3-carboxylate (4s)**

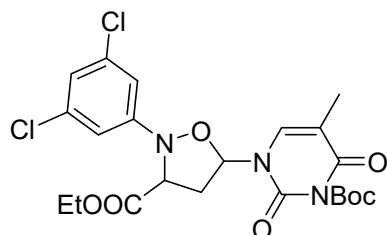

Yellow oil, Yield: 74% (38.0 mg);  $R_f = 0.25$  (PE/EA = 3:1, v/v);  $^1\text{H}$  NMR ( $\text{CDCl}_3$ , 400 MHz)  $\delta$  7.66 (d,  $J = 1.2$  Hz, 1H), 7.01 (t,  $J = 1.8$  Hz, 1H), 6.92 (d,  $J = 1.7$  Hz, 2H), 6.40 (dd,  $J = 7.7, 3.9$  Hz, 1H), 4.29–4.20 (m, 2H), 4.16 (dd,  $J = 9.8, 4.6$  Hz, 1H), 3.07–2.99 (m, 1H), 2.75 (dt,  $J = 14.1, 4.3$  Hz, 1H), 1.90 (d,  $J = 1.1$  Hz, 3H), 1.55 (s, 9H), 1.27 (t,  $J = 7.2$  Hz, 3H) ppm;  $^{13}\text{C}\{^1\text{H}\}$  NMR ( $\text{CDCl}_3$ , 100 MHz)  $\delta$  169.7, 161.0, 150.6, 148.7, 147.6, 135.7, 134.9, 123.7, 114.1, 111.3, 87.0, 83.0, 66.4, 62.7, 38.3, 27.4, 14.0, 12.7 ppm; HRMS (ESI)  $m/z$ :  $[\text{M} + \text{H}]^+$  Calcd for  $\text{C}_{22}\text{H}_{26}\text{Cl}_2\text{N}_3\text{O}_7^+$ , 514.1142; found, 514.1137.

**Ethyl 5-(3-(*tert*-butoxycarbonyl)-5-methyl-2,4-dioxo-3,4-dihydropyrimidin-1(2*H*)-yl)-2-(pyridin-2-yl)isoxazolidine-3-carboxylate (4t)**

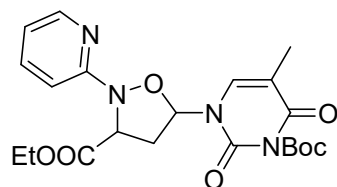

Yellow oil, Yield: 71% (31.7 mg);  $R_f = 0.25$  (PE/EA = 3:1, v/v);  $^1\text{H}$  NMR ( $\text{CDCl}_3$ , 400 MHz)  $\delta$  8.21–8.19 (m, 1H), 7.78 (d,  $J = 1.2$  Hz, 1H), 7.63–7.58 (m, 1H), 7.15 (d,  $J = 8.3$  Hz, 1H), 6.94–6.90 (m, 1H), 6.34 (dd,  $J = 8.2, 4.5$  Hz, 1H), 5.16 (dd,  $J = 9.7, 4.4$  Hz, 1H), 4.24 (q,  $J = 7.2$  Hz, 2H), 2.93–2.84 (m, 1H), 2.62 (dt,  $J = 14.0, 4.4$  Hz, 1H), 1.91 (d,  $J = 1.2$  Hz, 3H), 1.55 (s, 9H), 1.28 (t,  $J = 7.1$  Hz, 3H) ppm;  $^{13}\text{C}\{^1\text{H}\}$  NMR ( $\text{CDCl}_3$ , 100 MHz)  $\delta$  171.2, 161.0, 159.5, 148.9, 147.7, 147.4, 138.5, 135.3, 119.0, 111.6, 110.8, 86.9, 83.2, 62.2, 36.6, 27.4, 14.1, 12.7 ppm; HRMS (ESI)  $m/z$ :  $[\text{M} + \text{H}]^+$  Calcd for  $\text{C}_{21}\text{H}_{27}\text{N}_4\text{O}_7^+$ , 447.1874; found, 447.1871.

**Methyl 5-(3-(*tert*-butoxycarbonyl)-5-methyl-2,4-dioxo-3,4-dihydropyrimidin-1(2*H*)-yl)-2-phenylisoxazolidine-3-carboxylate (4u)**

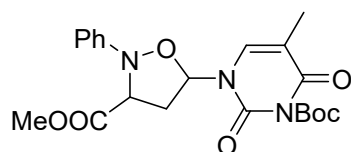

Yellow oil, Yield: 86% (37.1 mg);  $R_f = 0.20$  (PE/EA = 3:1, v/v);  $^1\text{H NMR}$  ( $\text{CDCl}_3$ , 400 MHz)  $\delta$  7.78 (d,  $J = 1.2$  Hz, 1H), 7.25 (dd,  $J = 8.8, 7.2$  Hz, 2H), 7.04 (d,  $J = 7.8$  Hz, 3H), 6.42 (dd,  $J = 7.9, 4.1$  Hz, 1H), 4.22 (dd,  $J = 9.6, 4.9$  Hz, 1H), 3.78 (s, 3H), 3.05–2.96 (m, 1H), 2.69 (dt,  $J = 14.0, 4.6$  Hz, 1H), 1.91 (d,  $J = 1.0$  Hz, 3H), 1.55 (s, 9H) ppm;  $^{13}\text{C}\{^1\text{H}\}$  NMR ( $\text{CDCl}_3$ , 100 MHz)  $\delta$  170.9, 161.1, 148.8, 148.7, 147.8, 135.3, 129.3, 124.3, 115.9, 111.1, 86.9, 82.9, 66.9, 53.2, 38.4, 27.4, 12.7 ppm; HRMS (ESI)  $m/z$ :  $[\text{M} + \text{H}]^+$  Calcd for  $\text{C}_{21}\text{H}_{26}\text{N}_3\text{O}_7^+$ , 432.1765; found, 432.1752.

***tert*-Butyl 5-(3-(*tert*-butoxycarbonyl)-5-methyl-2,4-dioxo-3,4-dihydropyrimidin-1(2*H*)-yl)-2-phenylisoxazolidine-3-carboxylate (4v)**

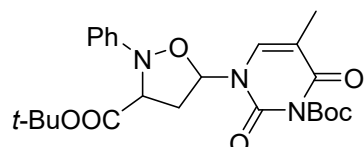

Yellow oil, Yield: 80% (37.9 mg);  $R_f = 0.25$  (PE/EA = 3:1, v/v);  $^1\text{H NMR}$  ( $\text{CDCl}_3$ , 400 MHz)  $\delta$  7.78 (d,  $J = 1.2$  Hz, 1H), 7.25 (dd,  $J = 8.7, 7.4$  Hz, 2H), 7.07–7.01 (m, 3H), 6.37 (dd,  $J = 7.6, 3.6$  Hz, 1H), 4.05 (dd,  $J = 9.6, 5.0$  Hz, 1H), 3.04–2.96 (m, 1H), 2.73–2.67 (m, 1H), 1.89 (d,  $J = 1.2$  Hz, 3H), 1.55 (s, 9H), 1.42 (s, 9H) ppm;  $^{13}\text{C}\{^1\text{H}\}$  NMR ( $\text{CDCl}_3$ , 100 MHz)  $\delta$  169.3, 161.2, 149.0, 148.8, 147.8, 135.6, 129.1, 124.0, 116.0, 110.8, 86.6, 83.2, 83.0, 67.7, 39.1, 27.8, 27.4, 12.7 ppm; HRMS (ESI)  $m/z$ :  $[\text{M} + \text{H}]^+$  Calcd for  $\text{C}_{24}\text{H}_{32}\text{N}_3\text{O}_7^+$ , 474.2235; found, 474.2232.

***tert*-Butyl 3-(3-benzoyl-2-phenylisoxazolidin-5-yl)-5-methyl-2,6-dioxo-3,6-dihydropyrimidine-1(2*H*)-carboxylate (4w)**

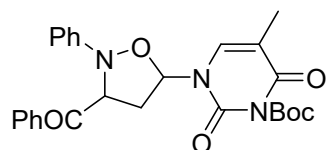

Yellow oil, Yield: 61% (29.1 mg);  $R_f = 0.25$  (PE/EA = 3:1, v/v);  $^1\text{H NMR}$  ( $\text{CDCl}_3$ , 400 MHz)  $\delta$  7.96–7.93 (m, 2H), 7.86 (d,  $J = 1.2$  Hz, 1H), 7.57 (t,  $J = 7.4$  Hz, 1H), 7.44 (t,  $J = 7.5$  Hz, 2H), 7.25 (dd,  $J = 8.7, 7.4$  Hz, 2H), 7.09–7.02 (m, 3H), 6.42 (dd,  $J = 8.2, 4.2$  Hz, 1H), 5.13 (dd,  $J = 9.3, 5.0$  Hz, 1H), 3.08–2.99 (m, 1H), 2.77 (dt,  $J = 13.9, 4.6$  Hz, 1H), 1.94 (d,  $J = 1.2$  Hz, 3H), 1.55 (s, 9H), 1.53 (s, 9H) ppm;  $^{13}\text{C}\{^1\text{H}\}$  NMR ( $\text{CDCl}_3$ , 100 MHz)  $\delta$  195.4, 161.1, 149.0, 148.3, 147.8, 135.7, 135.0, 134.2, 129.4, 129.0, 128.8, 124.3, 116.1, 111.2, 86.8, 82.8, 68.4, 37.5, 27.4, 12.8 ppm; HRMS (ESI)  $m/z$ :  $[\text{M} + \text{H}]^+$  Calcd for  $\text{C}_{26}\text{H}_{28}\text{N}_3\text{O}_6^+$ , 478.1973; found, 478.1986.

## 5. Characterization data of products 6

**Diethyl 2-phenyl-5-(9*H*-purin-9-yl)isoxazolidine-3,4-dicarboxylate (6a)**

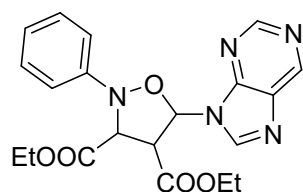

Yellow oil, Yield: 83% (34.1 mg);  $R_f = 0.20$  (PE/EA = 3:1, v/v);  $^1\text{H NMR}$  ( $\text{CDCl}_3$ , 400 MHz)  $\delta$

9.19 (s, 1H), 9.04 (s, 1H), 8.85 (s, 1H), 7.39–7.34 (m, 2H), 7.21 (d,  $J = 7.7$  Hz, 1H), 7.16 (t,  $J = 7.4$  Hz, 1H), 7.07 (d,  $J = 3.7$  Hz, 1H), 4.75 (d,  $J = 5.1$  Hz, 1H), 4.50 (dd,  $J = 5.0, 3.8$  Hz, 1H), 4.29 (d,  $J = 7.1$  Hz, 2H), 4.18 (d,  $J = 7.1$  Hz, 2H), 1.30 (t,  $J = 7.1$  Hz, 3H), 1.20 (t,  $J = 7.1$  Hz, 3H) ppm;  $^{13}\text{C}\{^1\text{H}\}$  NMR ( $\text{CDCl}_3$ , 100 MHz)  $\delta$  169.0, 168.1, 153.0, 151.3, 148.9, 148.9, 147.6, 144.0, 133.9, 129.2, 125.1, 117.2, 82.8, 70.3, 62.8, 62.7, 57.9, 14.0, 13.9 ppm; HRMS (ESI)  $m/z$ :  $[\text{M} + \text{H}]^+$  Calcd for  $\text{C}_{20}\text{H}_{22}\text{N}_5\text{O}_5^+$ , 412.1615; found, 412.1628.

#### Diethyl 5-(6-chloro-9H-purin-9-yl)-2-phenylisoxazolidine-3,4-dicarboxylate (6b)

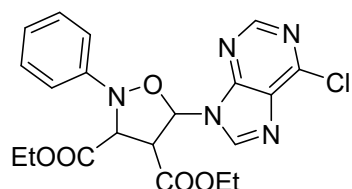

Yellow oil, Yield: 85% (37.9 mg);  $R_f = 0.25$  (PE/EA = 3:1, v/v);  $^1\text{H}$  NMR ( $\text{CDCl}_3$ , 400 MHz)  $\delta$  8.90 (s, 1H), 8.81 (s, 1H), 7.35 (dd,  $J = 8.6, 7.4$  Hz, 2H), 7.24–7.20 (m, 2H), 7.18 (t,  $J = 7.4$  Hz, 1H), 7.06 (d,  $J = 3.4$  Hz, 1H), 4.71 (d,  $J = 5.2$  Hz, 1H), 4.48 (dd,  $J = 5.1, 3.6$  Hz, 1H), 4.30 (d,  $J = 7.1$  Hz, 2H), 4.21 (d,  $J = 7.1$  Hz, 2H), 1.31 (t,  $J = 7.2$  Hz, 3H), 1.23 (t,  $J = 7.2$  Hz, 3H) ppm;  $^{13}\text{C}\{^1\text{H}\}$  NMR ( $\text{CDCl}_3$ , 100 MHz)  $\delta$  168.8, 167.9, 152.4, 151.6, 151.3, 147.4, 144.1, 131.5, 129.2, 125.4, 117.5, 83.3, 70.3, 62.8, 62.8, 58.2, 14.0, 13.9 ppm; HRMS (ESI)  $m/z$ :  $[\text{M} + \text{H}]^+$  Calcd for  $\text{C}_{20}\text{H}_{21}\text{ClN}_5\text{O}_5^+$ , 446.1226; found, 446.1223.

#### Diethyl 5-(6-bromo-9H-purin-9-yl)-2-phenylisoxazolidine-3,4-dicarboxylate (6c)

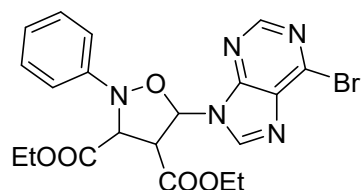

Yellow oil, Yield: 84% (41.2 mg);  $R_f = 0.25$  (PE/EA = 3:1, v/v);  $^1\text{H}$  NMR ( $\text{CDCl}_3$ , 400 MHz)  $\delta$  8.90 (s, 1H), 8.75 (s, 1H), 7.34 (dd,  $J = 8.7, 7.4$  Hz, 2H), 7.20 (dd,  $J = 8.6, 1.0$  Hz, 2H), 7.17 (t,  $J = 7.4$  Hz, 1H), 7.04 (d,  $J = 3.4$  Hz, 1H), 4.70 (d,  $J = 5.2$  Hz, 1H), 4.47 (dd,  $J = 5.2, 3.4$  Hz, 1H), 4.28 (d,  $J = 7.1$  Hz, 2H), 4.20 (d,  $J = 7.1$  Hz, 2H), 1.29 (t,  $J = 7.1$  Hz, 3H), 1.22 (t,  $J = 7.2$  Hz, 3H) ppm;  $^{13}\text{C}\{^1\text{H}\}$  NMR ( $\text{CDCl}_3$ , 100 MHz)  $\delta$  168.8, 167.9, 152.3, 150.4, 147.4, 143.9, 143.3, 134.1, 129.2, 125.4, 117.5, 83.3, 70.7, 62.8, 62.8, 58.2, 14.0, 13.9 ppm; HRMS (ESI)  $m/z$ :  $[\text{M} + \text{H}]^+$  Calcd for  $\text{C}_{20}\text{H}_{21}\text{BrN}_5\text{O}_5^+$ , 490.0721; found, 490.0720.

#### Diethyl 5-(6-methoxy-9H-purin-9-yl)-2-phenylisoxazolidine-3,4-dicarboxylate (6d)

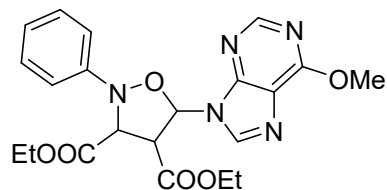

Yellow oil, Yield: 99% (43.7 mg);  $R_f = 0.25$  (PE/EA = 3:1, v/v);  $^1\text{H}$  NMR ( $\text{CDCl}_3$ , 400 MHz)  $\delta$  8.62 (s, 1H), 8.59 (s, 1H), 7.38–7.33 (m, 2H), 7.20 (d,  $J = 7.8$  Hz, 1H), 7.14 (t,  $J = 7.3$  Hz, 1H), 6.99 (d,  $J = 3.9$  Hz, 1H), 4.76 (d,  $J = 5.0$  Hz, 1H), 4.54–4.50 (m, 1H), 4.29 (d,  $J = 7.1$  Hz, 2H),

4.21 (s, 3H), 4.20–4.16 (m, 2H), 1.30 (t,  $J = 7.2$  Hz, 3H), 1.18 (t,  $J = 7.1$  Hz, 3H) ppm;  $^{13}\text{C}\{^1\text{H}\}$  NMR ( $\text{CDCl}_3$ , 100 MHz)  $\delta$  169.0, 168.2, 161.1, 152.5, 151.9, 147.9, 140.9, 129.2, 124.8, 121.3, 116.9, 83.2, 70.3, 62.7, 62.6, 57.8, 54.3, 14.0, 13.9 ppm; HRMS (ESI)  $m/z$ :  $[\text{M} + \text{H}]^+$  Calcd for  $\text{C}_{21}\text{H}_{24}\text{N}_5\text{O}_6^+$ , 442.1721; found, 442.1734.

**Diethyl 5-(6-(dimethylamino)-9H-purin-9-yl)-2-phenylisoxazolidine-3,4-dicarboxylate (6e)**

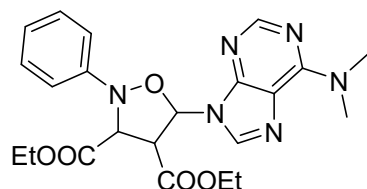

Yellow oil, Yield: 85% (38.6 mg);  $R_f = 0.25$  (PE/EA = 3:1, v/v);  $^1\text{H}$  NMR ( $\text{CDCl}_3$ , 400 MHz)  $\delta$  8.40 (s, 1H), 8.37 (s, 1H), 7.32 (dd,  $J = 8.5, 7.4$  Hz, 2H), 7.19 (d,  $J = 7.7$  Hz, 2H), 7.11 (t,  $J = 7.4$  Hz, 1H), 6.93 (d,  $J = 4.2$  Hz, 1H), 4.77 (d,  $J = 4.9$  Hz, 1H), 4.48 (t,  $J = 4.5$  Hz, 1H), 4.29 (d,  $J = 7.0$  Hz, 2H), 4.14 (d,  $J = 7.1$  Hz, 2H), 3.54 (s, 6H), 1.30 (t,  $J = 7.2$  Hz, 3H), 1.16 (t,  $J = 7.1$  Hz, 3H) ppm;  $^{13}\text{C}\{^1\text{H}\}$  NMR ( $\text{CDCl}_3$ , 100 MHz)  $\delta$  169.2, 168.4, 154.9, 152.7, 150.6, 148.2, 136.7, 129.1, 124.5, 119.8, 116.7, 83.1, 70.4, 62.6, 62.5, 57.6, 14.0, 13.9 ppm; HRMS (ESI)  $m/z$ :  $[\text{M} + \text{H}]^+$  Calcd for  $\text{C}_{22}\text{H}_{27}\text{N}_6\text{O}_5^+$ , 455.2037; found, 455.2040.

**Diethyl 2-phenyl-5-(6-(piperidin-1-yl)-9H-purin-9-yl)isoxazolidine-3,4-dicarboxylate (6f)**

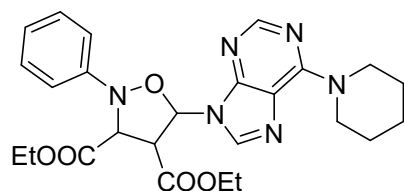

Yellow oil, Yield: 83% (41.0 mg);  $R_f = 0.30$  (PE/EA = 3:1, v/v);  $^1\text{H}$  NMR ( $\text{CDCl}_3$ , 400 MHz)  $\delta$  8.41 (s, 1H), 8.35 (s, 1H), 7.32 (dd,  $J = 8.6, 7.4$  Hz, 2H), 7.22–7.18 (m, 2H), 7.11 (t,  $J = 7.4$  Hz, 1H), 6.93 (d,  $J = 4.2$  Hz, 1H), 4.77 (d,  $J = 5.0$  Hz, 1H), 4.48 (t,  $J = 4.8$  Hz, 1H), 4.35–4.28 (m, 3H), 4.26–4.25 (m, 3H), 4.14 (d,  $J = 7.1$  Hz, 2H), 1.75–1.69 (m, 6H), 1.30 (t,  $J = 7.1$  Hz, 3H), 1.16 (t,  $J = 7.1$  Hz, 3H) ppm;  $^{13}\text{C}\{^1\text{H}\}$  NMR ( $\text{CDCl}_3$ , 100 MHz)  $\delta$  169.2, 168.4, 153.8, 152.8, 150.9, 148.1, 136.5, 129.1, 124.5, 119.4, 116.7, 83.0, 70.4, 62.6, 62.5, 57.6, 26.5, 24.8, 14.0, 13.9 ppm; HRMS (ESI)  $m/z$ :  $[\text{M} + \text{H}]^+$  Calcd for  $\text{C}_{25}\text{H}_{31}\text{N}_6\text{O}_5^+$ , 495.2350; found, 495.2356.

**Diethyl 2-phenyl-5-(6-phenyl-9H-purin-9-yl)isoxazolidine-3,4-dicarboxylate (6g)**

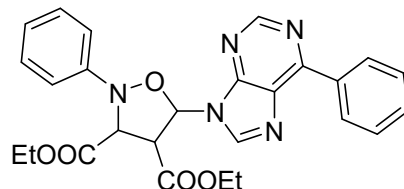

Yellow oil, Yield: 79% (38.5 mg);  $R_f = 0.30$  (PE/EA = 3:1, v/v);  $^1\text{H}$  NMR ( $\text{CDCl}_3$ , 400 MHz)  $\delta$  9.06 (s, 1H), 8.86 (s, 1H), 8.82–8.79 (m, 2H), 7.60–7.53 (m, 3H), 7.34 (dd,  $J = 8.5, 7.4$  Hz, 2H), 7.22–7.18 (m, 2H), 7.15 (t,  $J = 7.3$  Hz, 1H), 7.10 (d,  $J = 3.8$  Hz, 1H), 4.77 (d,  $J = 5.0$  Hz, 1H), 4.54 (dd,  $J = 5.0, 3.8$  Hz, 1H), 4.29 (d,  $J = 7.1$  Hz, 2H), 4.18 (d,  $J = 7.1$  Hz, 2H), 1.29 (t,  $J = 7.2$  Hz, 3H), 1.20 (t,  $J = 7.1$  Hz, 3H) ppm;  $^{13}\text{C}\{^1\text{H}\}$  NMR ( $\text{CDCl}_3$ , 100 MHz)  $\delta$  169.0, 168.2, 155.1,

152.7, 147.8, 143.0, 135.4, 131.1, 130.8, 129.8, 129.2, 128.7, 125.0, 117.1, 83.1, 70.4, 62.7, 57.9, 14.0, 13.9 ppm; HRMS (ESI)  $m/z$ :  $[M + H]^+$  Calcd for  $C_{26}H_{26}N_5O_5^+$ , 488.1928; found, 488.1936.

**Diethyl 5-(2-amino-6-chloro-9H-purin-9-yl)-2-phenylisoxazolidine-3,4-dicarboxylate (6h)**

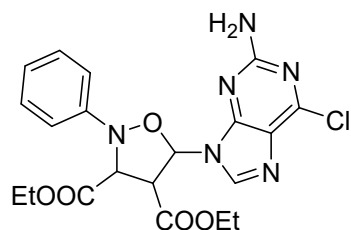

Yellow oil, Yield: 83% (38.3 mg);  $R_f$  = 0.25 (PE/EA = 3:1, v/v);  $^1H$  NMR ( $CDCl_3$ , 400 MHz)  $\delta$  8.47 (s, 1H), 7.32 (dd,  $J$  = 8.6, 7.4 Hz, 2H), 7.18 (d,  $J$  = 7.7 Hz, 2H), 7.14 (t,  $J$  = 7.4 Hz, 1H), 6.78 (d,  $J$  = 3.9 Hz, 1H), 5.33 (s, 2H), 4.69 (d,  $J$  = 5.2 Hz, 1H), 4.43 (dd,  $J$  = 5.1, 4.0 Hz, 1H), 4.29 (d,  $J$  = 7.1 Hz, 2H), 4.17 (d,  $J$  = 7.1 Hz, 2H), 1.30 (t,  $J$  = 7.2 Hz, 3H), 1.20 (t,  $J$  = 7.1 Hz, 3H) ppm;  $^{13}C\{^1H\}$  NMR ( $CDCl_3$ , 100 MHz)  $\delta$  168.9, 168.2, 159.3, 153.7, 151.5, 147.7, 140.8, 129.2, 125.0, 124.9, 117.1, 82.8, 70.3, 62.8, 62.6, 57.5, 14.0, 13.9 ppm; HRMS (ESI)  $m/z$ :  $[M + H]^+$  Calcd for  $C_{20}H_{22}ClN_6O_5^+$ , 461.1335; found, 461.1332.

**3-Ethyl 4-methyl 5-(6-chloro-9H-purin-9-yl)-2-phenylisoxazolidine-3,4-dicarboxylate (6i)**

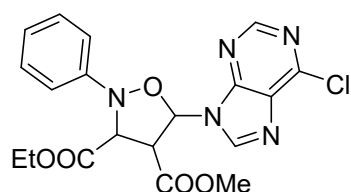

Yellow oil, Yield: 81% (35.0 mg);  $R_f$  = 0.25 (PE/EA = 3:1, v/v);  $^1H$  NMR ( $CDCl_3$ , 400 MHz),  $\delta$  8.88 (s, 1H), 8.80 (s, 1H), 7.34 (dd,  $J$  = 8.6, 7.4 Hz, 2H), 7.23–7.19 (m, 2H), 7.19 (t,  $J$  = 7.4 Hz, 1H), 7.03 (d,  $J$  = 3.4 Hz, 1H), 5.33 (s, 2H), 4.69 (d,  $J$  = 5.3 Hz, 1H), 4.52 (dd,  $J$  = 5.3, 3.4 Hz, 1H), 4.28 (d,  $J$  = 7.1 Hz, 2H), 3.79 (s, 3H), 1.28 (t,  $J$  = 7.2 Hz, 3H) ppm;  $^{13}C\{^1H\}$  NMR ( $CDCl_3$ , 100 MHz),  $\delta$  168.7, 168.4, 152.3, 151.6, 151.3, 147.3, 144.0, 131.5, 129.2, 125.4, 117.6, 83.2, 70.1, 62.9, 58.0, 53.5, 13.9 ppm; HRMS (ESI)  $m/z$ :  $[M + H]^+$  Calcd for  $C_{19}H_{19}ClN_5O_5^+$ , 432.1069; found, 432.1074.

**Ethyl 4-(acetoxymethyl)-5-(6-chloro-9H-purin-9-yl)-2-phenylisoxazolidine-3-carboxylate (6k)**

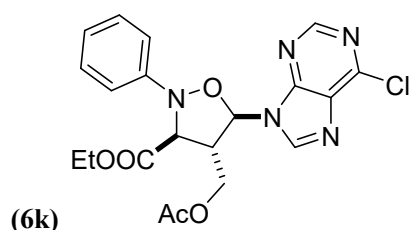

Yellow oil, Yield: 52% (23.1 mg);  $^1H$  NMR ( $CDCl_3$ , 600 MHz)  $\delta$  8.93 (s, 1H), 8.76 (s, 1H), 7.36–7.34 (m, 2H), 7.17–7.13 (m, 3H), 6.59 (d,  $J$  = 2.4 Hz, 1H), 4.45–4.43 (m, 1H), 4.39–4.36 (m, 1H), 4.32–4.27 (m, 2H), 4.03 (d,  $J$  = 6.0 Hz, 1H), 3.75–3.71 (m, 1H), 1.99 (s, 3H), 1.28 (t,  $J$  = 6.6 Hz, 3H) ppm;  $^{13}C\{^1H\}$  NMR ( $CDCl_3$ , 150 MHz)  $\delta$  170.6, 169.2, 152.3, 151.6, 151.3, 147.8, 144.3, 131.5, 129.3, 125.2, 117.4, 83.7, 69.9, 62.8, 62.6, 55.0, 29.8, 20.6, 14.1 ppm; HRMS (ESI)

$m/z$ :  $[M + H]^+$  Calcd for  $C_{20}H_{21}ClN_5O_5^+$ , 446.1226; found, 446.1222.

**Diethyl 5-(6-chloro-9H-purin-9-yl)-2-(*o*-tolyl)isoxazolidine-3,4-dicarboxylate (6l)**

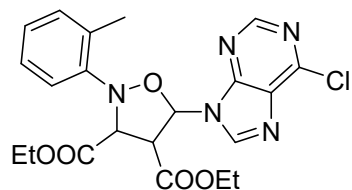

Yellow oil, Yield: 56% (25.7 mg);  $R_f = 0.3$  (PE/EA = 3:1, v/v);  $^1H$  NMR ( $CDCl_3$ , 400 MHz)  $\delta$  8.80 (s, 1H), 8.42 (s, 1H), 7.32 (dd,  $J = 7.8, 3.0$  Hz, 1H), 7.17 (dd,  $J = 7.2, 1.8$  Hz, 1H), 7.13–7.12 (m, 2H), 7.10–7.07 (m, 1H), 5.01–4.99 (m, 1H), 4.97–4.95 (m, 1H), 4.26–4.18 (m, 2H), 3.92–3.83 (m, 2H), 2.35 (s, 3H), 1.23 (t,  $J = 7.2$  Hz, 3H), 0.89 (t,  $J = 7.2$  Hz, 3H) ppm;  $^{13}C\{^1H\}$  NMR ( $CDCl_3$ , 150 MHz)  $\delta$  167.4, 166.7, 152.3, 151.8, 151.5, 144.4, 143.6, 132.1, 130.8, 129.6, 126.6, 126.3, 118.5, 83.4, 66.9, 62.3, 61.4, 56.2, 18.1, 14.0, 13.7 ppm; HRMS (ESI)  $m/z$ :  $[M + H]^+$  Calcd for  $C_{21}H_{23}ClN_5O_5^+$ , 460.1382; found, 460.1388.

**Diethyl 5-(6-chloro-9H-purin-9-yl)-2-(*m*-tolyl)isoxazolidine-3,4-dicarboxylate (6m)**

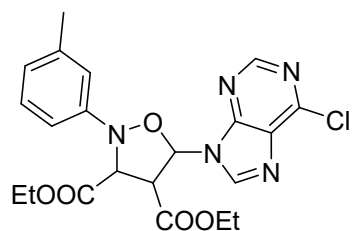

Yellow oil, Yield: 84% (38.6 mg);  $R_f = 0.3$  (PE/EA = 3:1, v/v);  $^1H$  NMR ( $CDCl_3$ , 400 MHz)  $\delta$  8.90 (s, 1H), 8.80 (s, 1H), 7.24 (t,  $J = 7.7$  Hz, 1H), 7.04 (d,  $J = 3.3$  Hz, 1H), 7.03–6.97 (m, 3H), 4.67 (d,  $J = 5.4$  Hz, 1H), 4.45 (dd,  $J = 5.4, 3.4$  Hz, 1H), 4.35–4.28 (m, 2H), 4.21 (q,  $J = 7.1$  Hz, 2H), 2.35 (s, 3H), 1.30 (t,  $J = 7.1$  Hz, 3H), 1.23 (t,  $J = 7.1$  Hz, 3H) ppm;  $^{13}C\{^1H\}$  NMR ( $CDCl_3$ , 100 MHz)  $\delta$  168.9, 167.9, 152.3, 151.6, 151.2, 147.3, 144.1, 139.2, 131.4, 129.0, 126.2, 118.3, 114.6, 83.1, 70.2, 62.8, 62.7, 58.3, 21.5, 14.0, 13.9 ppm; HRMS (ESI)  $m/z$ :  $[M + H]^+$  Calcd for  $C_{21}H_{23}ClN_5O_5^+$ , 460.1382; found, 460.1379.

**Diethyl 5-(6-chloro-9H-purin-9-yl)-2-(*p*-tolyl)isoxazolidine-3,4-dicarboxylate (6n)**

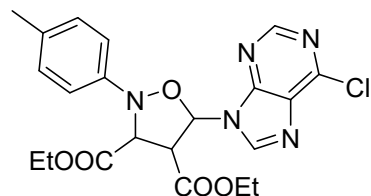

Yellow oil, Yield: 88% (40.4 mg);  $R_f = 0.3$  (PE/EA = 3:1, v/v);  $^1H$  NMR ( $CDCl_3$ , 400 MHz)  $\delta$  8.91 (s, 1H), 8.79 (s, 1H), 7.18–7.11 (m, 4H), 7.03 (d,  $J = 3.2$  Hz, 1H), 4.61 (d,  $J = 5.7$  Hz, 1H), 4.44 (dd,  $J = 5.7, 3.3$  Hz, 1H), 4.33–4.21 (m, 4H), 2.33 (s, 3H), 1.28 (t,  $J = 7.2$  Hz, 3H), 1.24 (t,  $J = 7.1$  Hz, 3H) ppm;  $^{13}C\{^1H\}$  NMR ( $CDCl_3$ , 100 MHz)  $\delta$  168.7, 168.0, 152.3, 151.6, 151.2, 144.7, 144.2, 135.7, 131.4, 129.7, 118.4, 83.1, 70.5, 62.7, 58.6, 20.8, 14.0, 14.0 ppm; HRMS (ESI)  $m/z$ :  $[M + H]^+$  Calcd for  $C_{21}H_{23}ClN_5O_5^+$ , 460.1382; found, 460.1390.

dr (*endo*-6q/*exo*-6q) = 9:1

Diethyl 5-(6-chloro-9*H*-purin-9-yl)-2-(2-chlorophenyl)isoxazolidine-3,4-dicarboxylate (*endo*-6q)

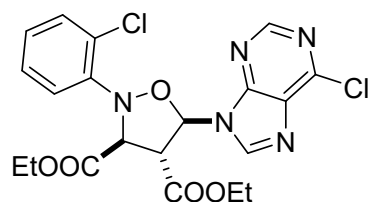

Yellow oil, Yield: 70% (33.7 mg), dr (*trans/cis*) = 9:1;  $R_f$  = 0.31 (PE/EA = 3:1, v/v);  $^1\text{H}$  NMR ( $\text{CDCl}_3$ , 600 MHz)  $\delta$  8.82 (s, 1H), 8.79 (s, 1H), 7.27 (t,  $J$  = 7.8 Hz, 1H), 7.20 (t,  $J$  = 1.8 Hz, 1H), 7.12–7.10 (m, 1H), 7.06–7.05 (m, 1H), 7.02 (d,  $J$  = 3.6 Hz, 1H), 4.71 (d,  $J$  = 4.8 Hz, 1H), 4.53–4.52 (m, 1H), 4.34–4.28 (m, 2H), 4.23 (q,  $J$  = 7.2 Hz, 2H), 1.29 (t,  $J$  = 7.2 Hz, 3H), 1.22 (t,  $J$  = 7.2 Hz, 3H) ppm;  $^{13}\text{C}\{^1\text{H}\}$  NMR ( $\text{CDCl}_3$ , 150 MHz)  $\delta$  168.6, 167.8, 152.4, 151.6, 151.4, 148.9, 143.9, 135.0, 131.6, 130.3, 125.1, 117.3, 115.1, 83.5, 70.0, 63.1, 63.0, 57.9, 14.0, 14.0 ppm; HRMS (ESI)  $m/z$ :  $[\text{M} + \text{H}]^+$  Calcd for  $\text{C}_{20}\text{H}_{20}\text{Cl}_2\text{N}_5\text{O}_5^+$ , 480.0836; found, 480.0830.

Diethyl 5-(6-chloro-9*H*-purin-9-yl)-2-(2-chlorophenyl)isoxazolidine-3,4-dicarboxylate (*exo*-6q)

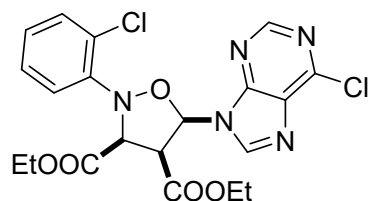

Yellow oil, Yield: 8% (3.7 mg);  $R_f$  = 0.30 (PE/EA = 3:1, v/v);  $^1\text{H}$  NMR ( $\text{CDCl}_3$ , 600 MHz)  $\delta$  8.69 (s, 1H), 8.35 (s, 1H), 7.16 (t,  $J$  = 8.4 Hz, 1H), 7.05 (d,  $J$  = 5.4 Hz, 1H), 7.02–6.98 (m, 2H), 6.87 (d,  $J$  = 10.2 Hz, 1H), 5.14–5.10 (m, 2H), 4.21 (q,  $J$  = 7.2 Hz, 2H), 4.16–4.09 (m, 2H), 1.24 (t,  $J$  = 7.2 Hz, 3H), 1.13 (t,  $J$  = 7.2 Hz, 3H) ppm; HRMS (ESI)  $m/z$ :  $[\text{M} + \text{H}]^+$  Calcd for  $\text{C}_{20}\text{H}_{20}\text{Cl}_2\text{N}_5\text{O}_5^+$ , 480.0836; found, 480.0830.

Diethyl 5-(6-chloro-9*H*-purin-9-yl)-2-(3-chlorophenyl)isoxazolidine-3,4-dicarboxylate (6r)

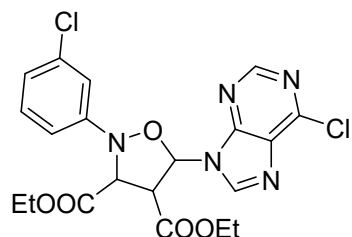

Yellow oil, Yield: 81% (38.8 mg);  $R_f$  = 0.3 (PE/EA = 3:1, v/v);  $^1\text{H}$  NMR ( $\text{CDCl}_3$ , 400 MHz)  $\delta$  8.74 (s, 1H), 8.73 (s, 1H), 7.20 (d,  $J$  = 8.0 Hz, 1H), 7.14 (t,  $J$  = 2.1 Hz, 1H), 7.08–7.04 (m, 1H), 7.01–6.98 (m, 1H), 6.94 (d,  $J$  = 3.5 Hz, 1H), 4.63 (d,  $J$  = 4.9 Hz, 1H), 4.43 (dd,  $J$  = 4.8, 3.6 Hz, 1H), 4.22 (m, 2H), 4.14 (q,  $J$  = 7.1 Hz, 2H), 1.23 (t,  $J$  = 7.2 Hz, 3H), 1.16 (t,  $J$  = 7.1 Hz, 3H) ppm;  $^{13}\text{C}\{^1\text{H}\}$  NMR ( $\text{CDCl}_3$ , 100 MHz)  $\delta$  167.5, 166.7, 151.4, 150.5, 150.3, 147.8, 142.8, 134.0, 130.5, 129.3, 124.0, 116.2, 114.0, 82.4, 68.9, 62.0, 61.9, 56.8, 12.9, 12.9 ppm; HRMS (ESI)  $m/z$ :  $[\text{M} + \text{H}]^+$  Calcd for  $\text{C}_{20}\text{H}_{20}\text{Cl}_2\text{N}_5\text{O}_5^+$ , 480.0836; found, 480.0833.



**Diethyl 5-(6-chloro-9H-purin-9-yl)-2-(4-chlorophenyl)isoxazolidine-3,4-dicarboxylate (6s)**

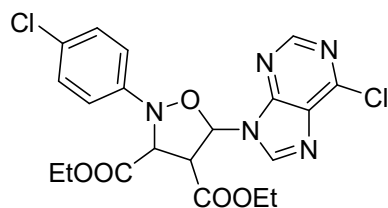

Yellow oil, Yield: 86% (41.2 mg);  $R_f = 0.3$  (PE/EA = 3:1, v/v);  $^1\text{H NMR}$  ( $\text{CDCl}_3$ , 400 MHz)  $\delta$  8.84 (s, 1H), 8.80 (s, 1H), 7.32 (d,  $J = 8.9$  Hz, 1H), 7.14 (d,  $J = 8.9$  Hz, 2H), 7.01 (d,  $J = 3.4$  Hz, 1H), 4.65 (d,  $J = 5.2$  Hz, 1H), 4.49 (dd,  $J = 5.2, 3.4$  Hz, 1H), 4.28 (q,  $J = 7.1$  Hz, 2H), 4.22 (q,  $J = 7.1$  Hz, 2H), 1.30 (t,  $J = 7.2$  Hz, 3H), 1.24 (t,  $J = 7.1$  Hz, 3H) ppm;  $^{13}\text{C}\{^1\text{H}\}$  NMR ( $\text{CDCl}_3$ , 100 MHz)  $\delta$  168.5, 167.8, 152.4, 151.6, 151.3, 146.0, 143.9, 131.5, 130.7, 129.3, 118.9, 83.3, 70.2, 63.0, 62.9, 58.0, 14.0, 13.9 ppm; HRMS (ESI)  $m/z$ :  $[\text{M} + \text{H}]^+$  Calcd for  $\text{C}_{20}\text{H}_{20}\text{Cl}_2\text{N}_5\text{O}_5^+$ , 480.0836; found, 480.0833.

**Diethyl 5-(6-chloro-9H-purin-9-yl)-2-(4-fluorophenyl)isoxazolidine-3,4-dicarboxylate (6t)**

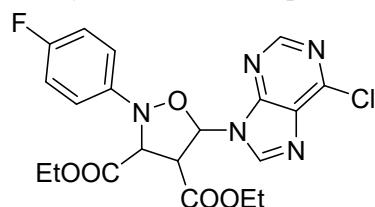

Yellow oil, Yield: 78% (36.1 mg);  $^1\text{H NMR}$  ( $\text{CDCl}_3$ , 600 MHz)  $\delta$  8.87 (s, 1H), 8.77 (s, 1H), 7.23–7.21 (m, 2H), 7.05–7.02 (m, 2H), 7.01 (d,  $J = 3.0$  Hz, 1H), 4.53 (d,  $J = 6.0$  Hz, 1H), 4.46–4.45 (m, 1H), 4.28–4.23 (m, 4H), 1.24 (td,  $J = 7.2, 4.8$  Hz, 6H) ppm;  $^{13}\text{C}\{^1\text{H}\}$  NMR ( $\text{CDCl}_3$ , 150 MHz)  $\delta$  168.4, 168.0, 152.4, 151.7, 151.3, 144.1, 131.5, 120.9, 120.9, 116.1, 116.0, 83.1, 70.9, 62.9, 62.9, 58.6, 14.1, 14.0 ppm; HRMS (ESI)  $m/z$ :  $[\text{M} + \text{H}]^+$  Calcd for  $\text{C}_{20}\text{H}_{20}\text{ClF}\text{N}_5\text{O}_5^+$ , 464.1132; found, 464.1137.

**Diethyl 5-(6-chloro-9H-purin-9-yl)-2-(pyridin-2-yl)isoxazolidine-3,4-dicarboxylate (6u)**

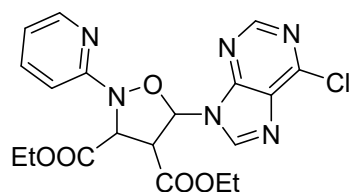

Yellow oil, Yield: 74% (33.0 mg);  $R_f = 0.3$  (PE/EA = 3:1, v/v);  $^1\text{H NMR}$  ( $\text{CDCl}_3$ , 400 MHz)  $\delta$  8.84 (s, 1H), 8.80 (s, 1H), 8.27 (dq,  $J = 4.9, 0.8$  Hz, 1H), 7.73–7.68 (m, 1H), 7.22 (d,  $J = 8.3$  Hz, 1H), 7.02 (ddd,  $J = 7.3, 4.9, 0.8$  Hz, 1H), 6.99 (d,  $J = 4.1$  Hz, 1H), 5.64 (d,  $J = 4.2$  Hz, 1H), 4.49 (dd,  $J = 5.2, 3.4$  Hz, 1H), 4.44–4.37 (m, 2H), 4.24–4.14 (m, 2H), 1.37 (t,  $J = 7.1$  Hz, 3H), 1.22 (t,  $J = 7.1$  Hz, 3H) ppm;  $^{13}\text{C}\{^1\text{H}\}$  NMR ( $\text{CDCl}_3$ , 100 MHz)  $\delta$  169.8, 168.1, 159.1, 152.5, 151.7, 151.4, 147.5, 144.0, 138.6, 131.5, 119.5, 111.0, 84.1, 66.1, 62.7, 62.6, 56.2, 14.1, 13.9 ppm; HRMS (ESI)  $m/z$ :  $[\text{M} + \text{H}]^+$  Calcd for  $\text{C}_{19}\text{H}_{20}\text{ClN}_6\text{O}_5^+$ , 447.1178; found, 447.1174.

**Diethyl 5-(6-chloro-9H-purin-9-yl)-2-(3,4-dimethylphenyl)isoxazolidine-3,4-dicarboxylate (6v)**

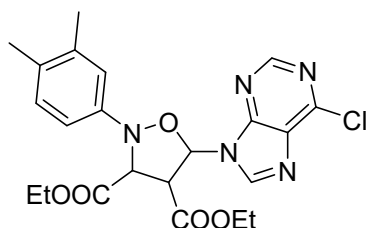

Yellow oil, Yield: 70% (33.1 mg);  $R_f = 0.3$  (PE/EA = 3:1, v/v);  $^1\text{H NMR}$  ( $\text{CDCl}_3$ , 400 MHz)  $\delta$  8.93 (s, 1H), 8.79 (s, 1H), 7.09 (d,  $J = 8.1$  Hz, 1H), 7.02 (d,  $J = 3.2$  Hz, 1H), 7.01 (s, 1H), 6.95 (dd,  $J = 8.1, 2.4$  Hz, 1H), 4.58 (d,  $J = 5.9$  Hz, 1H), 4.42 (dd,  $J = 5.9, 3.2$  Hz, 1H), 4.33–4.27 (m, 2H), 4.23 (q,  $J = 7.1$  Hz, 2H), 2.25 (s, 3H), 2.23 (s, 3H), 1.31–1.23 (m, 6H) ppm;  $^{13}\text{C}\{^1\text{H}\}$  NMR ( $\text{CDCl}_3$ , 100 MHz)  $\delta$  168.7, 168.0, 152.3, 151.6, 151.2, 144.8, 144.2, 137.6, 134.5, 131.4, 130.1, 119.9, 115.8, 83.0, 70.3, 62.7, 62.7, 58.8, 14.0, 14.0 ppm; HRMS (ESI)  $m/z$ :  $[\text{M} + \text{H}]^+$  Calcd for  $\text{C}_{22}\text{H}_{25}\text{ClN}_5\text{O}_5^+$ , 474.1539; found, 474.1535.

**Diethyl 5-(6-chloro-9H-purin-9-yl)-2-(3,5-dichlorophenyl)isoxazolidine-3,4-dicarboxylate (6w)**

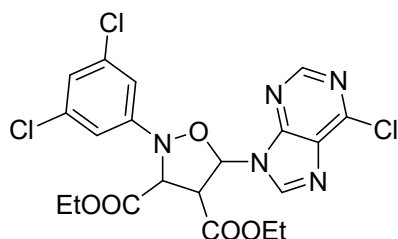

Yellow oil, Yield: 68% (34.9 mg);  $R_f = 0.3$  (PE/EA = 3:1, v/v);  $^1\text{H NMR}$  ( $\text{CDCl}_3$ , 400 MHz)  $\delta$  8.81 (s, 1H), 8.75 (s, 1H), 7.13 (t,  $J = 1.7$  Hz, 1H), 7.07 (d,  $J = 1.7$  Hz, 2H), 6.98 (d,  $J = 3.5$  Hz, 1H), 4.71 (d,  $J = 4.6$  Hz, 1H), 4.54 (dd,  $J = 4.5, 3.8$  Hz, 1H), 4.38–4.30 (m, 2H), 4.23 (q,  $J = 7.1$  Hz, 2H), 1.32 (t,  $J = 7.1$  Hz, 3H), 1.25 (t,  $J = 7.2$  Hz, 3H) ppm;  $^{13}\text{C}\{^1\text{H}\}$  NMR ( $\text{CDCl}_3$ , 100 MHz)  $\delta$  168.3, 167.5, 152.5, 151.5, 151.5, 149.6, 143.6, 135.7, 131.6, 124.6, 115.1, 83.6, 69.5, 63.2, 63.1, 57.5, 14.0, 13.9 ppm; HRMS (ESI)  $m/z$ :  $[\text{M} + \text{H}]^+$  Calcd for  $\text{C}_{20}\text{H}_{19}\text{Cl}_3\text{N}_5\text{O}_5^+$ , 514.0446; found, 514.0443.

**4-Ethyl 3-methyl 5-(6-chloro-9H-purin-9-yl)-2-phenylisoxazolidine-3,4-dicarboxylate (6x)**

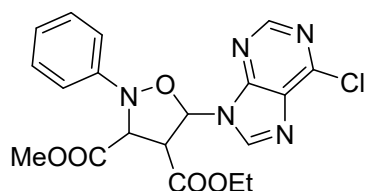

Yellow oil, Yield: 81% (35.0 mg);  $R_f = 0.3$  (PE/EA = 3:1, v/v);  $^1\text{H NMR}$  ( $\text{CDCl}_3$ , 400 MHz)  $\delta$  8.86 (s, 1H), 8.80 (s, 1H), 7.39–7.34 (m, 2H), 7.19 (d,  $J = 8.5$  Hz, 2H), 7.15 (d,  $J = 7.4$  Hz, 1H), 7.04 (d,  $J = 3.5$  Hz, 1H), 4.78 (d,  $J = 5.0$  Hz, 1H), 4.49 (dd,  $J = 5.0, 3.7$  Hz, 1H), 4.19 (q,  $J = 7.1$  Hz, 2H), 3.87 (s, 3H), 1.21 (t,  $J = 7.1$  Hz, 3H) ppm;  $^{13}\text{C}\{^1\text{H}\}$  NMR ( $\text{CDCl}_3$ , 100 MHz)  $\delta$  169.4, 167.8, 152.4, 151.6, 151.3, 147.4, 144.0, 131.5, 129.3, 125.3, 117.2, 83.4, 70.1, 62.8, 58.0, 53.6, 13.9 ppm; HRMS (ESI)  $m/z$ :  $[\text{M} + \text{H}]^+$  Calcd for  $\text{C}_{19}\text{H}_{19}\text{ClN}_5\text{O}_5^+$ , 432.1069; found, 432.1065.

**3-(tert-Butyl) 4-ethyl 5-(6-chloro-9H-purin-9-yl)-2-phenylisoxazolidine-3,4-dicarboxylate (6y)**

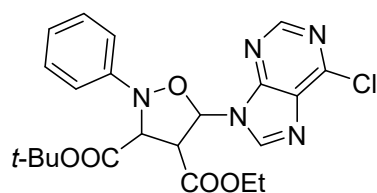

Yellow oil, Yield: 62% (29.3 mg);  $R_f = 0.3$  (PE/EA = 3:1, v/v);  $^1\text{H NMR}$  ( $\text{CDCl}_3$ , 400 MHz)  $\delta$  8.92 (s, 1H), 8.80 (s, 1H), 7.34 (dd,  $J = 8.6, 7.4$  Hz, 2H), 7.23–7.20 (m, 2H), 7.17 (t,  $J = 7.4$  Hz, 1H), 7.04 (d,  $J = 3.2$  Hz, 1H), 4.51 (d,  $J = 5.6$  Hz, 1H), 4.41 (dd,  $J = 5.6, 3.2$  Hz, 1H), 4.21 (q,  $J = 7.2$  Hz, 2H), 1.47 (s, 9H), 1.24 (t,  $J = 7.2$  Hz, 3H) ppm;  $^{13}\text{C}\{^1\text{H}\}$  NMR ( $\text{CDCl}_3$ , 100 MHz)  $\delta$  168.1, 167.6, 152.3, 151.6, 151.2, 147.5, 144.2, 131.4, 129.1, 125.4, 117.9, 84.0, 83.0, 71.2, 62.7, 58.4, 27.8, 14.0 ppm; HRMS (ESI)  $m/z$ :  $[\text{M} + \text{H}]^+$  Calcd for  $\text{C}_{22}\text{H}_{25}\text{ClN}_5\text{O}_5^+$ , 474.1539; found, 474.1535.

#### Ethyl 3-benzoyl-5-(6-chloro-9H-purin-9-yl)-2-phenylisoxazolidine-4-carboxylate (6z)

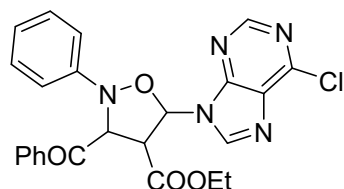

Yellow oil, Yield: 59% (28.2 mg);  $R_f = 0.3$  (PE/EA = 3:1, v/v);  $^1\text{H NMR}$  ( $\text{CDCl}_3$ , 400 MHz)  $\delta$  9.03 (s, 1H), 8.78 (s, 1H), 8.04 (d,  $J = 7.4$  Hz, 2H), 7.63 (t,  $J = 7.4$  Hz, 1H), 7.52–7.47 (m, 2H), 7.39–7.34 (m, 2H), 7.24 (d,  $J = 7.9$  Hz, 2H), 7.15 (d,  $J = 7.3$  Hz, 1H), 7.07 (d,  $J = 4.2$  Hz, 1H), 5.83 (d,  $J = 4.1$  Hz, 1H), 4.68 (t,  $J = 4.1$  Hz, 1H), 4.12 (q,  $J = 7.1$  Hz, 2H), 1.12 (t,  $J = 7.1$  Hz, 3H) ppm;  $^{13}\text{C}\{^1\text{H}\}$  NMR ( $\text{CDCl}_3$ , 100 MHz)  $\delta$  194.2, 168.6, 152.4, 151.2, 147.1, 144.4, 134.7, 134.4, 131.4, 129.5, 129.3, 128.9, 125.1, 116.7, 83.4, 71.2, 62.7, 56.4, 13.9 ppm; HRMS (ESI)  $m/z$ :  $[\text{M} + \text{H}]^+$  Calcd for  $\text{C}_{24}\text{H}_{21}\text{ClN}_5\text{O}_4^+$ , 478.1277; found, 478.1264.

## 6. Characterization data of products 8

#### Diethyl 5-(1H-benzo[d]imidazol-1-yl)-2-phenylisoxazolidine-3,4-dicarboxylate (8a)

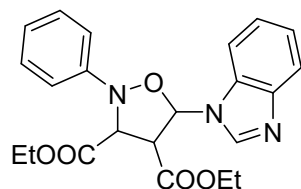

Yellow oil, Yield: 84% (34.4 mg);  $R_f = 0.30$  (PE/EA = 3:1, v/v);  $^1\text{H NMR}$  ( $\text{CDCl}_3$ , 400 MHz)  $\delta$  8.38 (s, 1H), 7.86–7.83 (m, 1H), 7.71 (d,  $J = 7.1$  Hz, 1H), 7.40–7.32 (m, 4H), 7.20 (d,  $J = 7.9$  Hz, 1H), 7.13 (t,  $J = 7.4$  Hz, 1H), 6.63 (d,  $J = 5.3$  Hz, 1H), 4.84 (d,  $J = 5.2$  Hz, 1H), 4.47 (t,  $J = 1.3$  Hz, 1H), 4.31 (q,  $J = 7.2$  Hz, 2H), 4.13 (q,  $J = 7.1$  Hz, 2H), 1.31 (t,  $J = 7.1$  Hz, 3H), 1.18 (t,  $J = 7.1$  Hz, 3H) ppm;  $^{13}\text{C}\{^1\text{H}\}$  NMR ( $\text{CDCl}_3$ , 100 MHz)  $\delta$  169.0, 168.4, 148.3, 144.0, 141.6, 132.5, 129.3, 124.4, 123.7, 123.0, 120.7, 116.1, 110.5, 85.5, 70.4, 62.8, 62.6, 56.5, 14.0, 13.9 ppm; HRMS (ESI)  $m/z$ :  $[\text{M} + \text{H}]^+$  Calcd for  $\text{C}_{22}\text{H}_{24}\text{N}_3\text{O}_5^+$ , 410.1710; found, 410.1716.

**Diethyl 5-(2-chloro-1H-benzo[d]imidazol-1-yl)-2-phenylisoxazolidine-3,4-dicarboxylate (8b)**

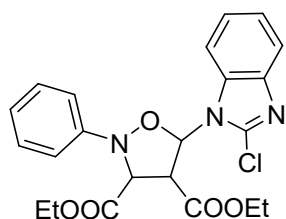

Yellow oil, Yield: 73% (32.3 mg);  $R_f = 0.30$  (PE/EA = 3:1, v/v);  $^1\text{H NMR}$  ( $\text{CDCl}_3$ , 400 MHz)  $\delta$  8.10–8.07 (m, 1H), 7.75–7.72 (m, 1H), 7.41–7.33 (m, 4H), 7.22 (d,  $J = 7.9$  Hz, 2H), 7.13 (t,  $J = 7.4$  Hz, 1H), 6.64 (d,  $J = 7.8$  Hz, 1H), 4.88 (d,  $J = 6.7$  Hz, 1H), 4.75 (t,  $J = 7.2$  Hz, 1H), 4.37 (q,  $J = 7.2$  Hz, 2H), 4.19–4.09 (m, 2H), 1.31 (t,  $J = 7.2$  Hz, 3H), 1.17 (t,  $J = 7.1$  Hz, 3H) ppm;  $^{13}\text{C}\{^1\text{H}\}$  NMR ( $\text{CDCl}_3$ , 100 MHz)  $\delta$  169.2, 168.0, 148.9, 142.1, 140.1, 132.4, 129.5, 124.2, 124.1, 123.8, 119.8, 115.4, 112.5, 86.0, 70.6, 62.8, 62.6, 53.5, 14.1, 13.9 ppm; HRMS (ESI)  $m/z$ :  $[\text{M} + \text{H}]^+$  Calcd for  $\text{C}_{22}\text{H}_{23}\text{ClN}_3\text{O}_5^+$ , 444.1321; found, 444.1312.

**Diethyl 5-(5-chloro-1H-benzo[d]imidazol-1-yl)-2-phenylisoxazolidine-3,4-dicarboxylate (8c)**

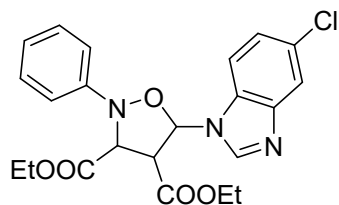

Yellow oil, Yield: 83% (36.8 mg);  $R_f = 0.30$  (PE/EA = 3:1, v/v);  $^1\text{H NMR}$  ( $\text{CDCl}_3$ , 400 MHz)  $\delta$  8.38 (s, 1H), 7.82 (d,  $J = 1.8$  Hz, 1H), 7.67 (d,  $J = 8.6$  Hz, 1H), 7.39–7.35 (m, 2H), 7.35–7.32 (m, 1H), 7.22–7.19 (m, 2H), 7.14 (t,  $J = 7.4$  Hz, 1H), 6.60 (d,  $J = 5.1$  Hz, 1H), 4.80 (d,  $J = 5.4$  Hz, 1H), 4.43 (t,  $J = 4.1$  Hz, 1H), 4.30 (q,  $J = 7.1$  Hz, 2H), 4.14 (q,  $J = 7.1$  Hz, 2H), 1.31 (t,  $J = 7.1$  Hz, 3H), 1.19 (t,  $J = 7.2$  Hz, 3H) ppm;  $^{13}\text{C}\{^1\text{H}\}$  NMR ( $\text{CDCl}_3$ , 100 MHz)  $\delta$  168.9, 168.3, 148.0, 144.8, 142.9, 131.1, 129.3, 128.7, 124.2, 120.4, 116.4, 111.5, 85.5, 70.3, 62.8, 62.7, 56.7, 14.0, 13.9 ppm; HRMS (ESI)  $m/z$ :  $[\text{M} + \text{H}]^+$  Calcd for  $\text{C}_{22}\text{H}_{23}\text{ClN}_3\text{O}_5^+$ , 444.1321; found, 444.1313.

**Diethyl 5-(5,6-dimethyl-1H-benzo[d]imidazol-1-yl)-2-phenylisoxazolidine-3,4-dicarboxylate (8d)**

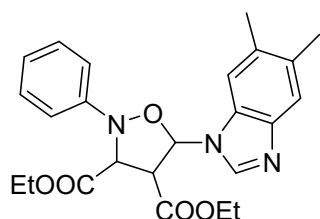

Yellow oil, Yield: 73% (31.9 mg);  $R_f = 0.30$  (PE/EA = 3:1, v/v);  $^1\text{H NMR}$  ( $\text{CDCl}_3$ , 400 MHz)  $\delta$  8.23 (s, 1H), 7.59 (s, 1H), 7.47 (s, 1H), 7.34 (dd,  $J = 8.7, 7.4$  Hz, 2H), 7.22–7.19 (m, 2H), 7.12 (t,  $J = 7.4$  Hz, 1H), 6.55 (d,  $J = 5.5$  Hz, 1H), 4.85 (d,  $J = 5.3$  Hz, 1H), 4.47 (t,  $J = 5.4$  Hz, 1H), 4.38–4.31 (m, 2H), 4.12 (q,  $J = 7.2$  Hz, 2H), 2.42 (s, 3H), 2.39 (s, 3H), 1.32 (t,  $J = 7.2$  Hz, 3H), 1.17 (t,  $J = 7.1$  Hz, 3H) ppm;  $^{13}\text{C}\{^1\text{H}\}$  NMR ( $\text{CDCl}_3$ , 100 MHz)  $\delta$  169.1, 168.6, 148.5, 142.6, 140.9, 132.9, 131.9, 131.0, 129.3, 124.2, 120.6, 115.9, 110.7, 85.6, 70.3, 62.7, 62.5, 56.2, 20.6, 20.2, 14.0, 13.9 ppm; HRMS (ESI)  $m/z$ :  $[\text{M} + \text{H}]^+$  Calcd for  $\text{C}_{24}\text{H}_{28}\text{N}_3\text{O}_5^+$ , 438.2023; found,

438.2026.

**Diethyl 2-phenyl-5-(2-phenyl-1*H*-imidazol-1-yl)isoxazolidine-3,4-dicarboxylate (8e)**

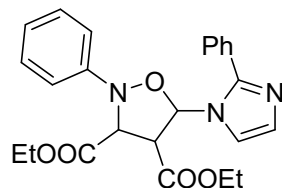

Yellow oil, Yield: 79% (34.4 mg);  $R_f = 0.30$  (PE/EA = 3:1, v/v);  $^1\text{H NMR}$  ( $\text{CDCl}_3$ , 400 MHz)  $\delta$  7.74 (d,  $J = 1.5$  Hz, 1H), 7.67–7.64 (m, 2H), 7.48–7.45 (m, 3H), 7.26 (dd,  $J = 8.7, 7.4$  Hz, 2H), 7.22 (d,  $J = 1.1$  Hz, 1H), 7.12–7.08 (m, 2H), 7.04 (d,  $J = 7.4$  Hz, 1H), 6.42 (d,  $J = 5.1$  Hz, 1H), 4.77 (d,  $J = 4.8$  Hz, 1H), 4.38–4.31 (m, 3H), 4.04–3.98 (m, 2H), 1.33 (t,  $J = 7.2$  Hz, 3H), 1.10 (t,  $J = 7.1$  Hz, 3H) ppm;  $^{13}\text{C}\{^1\text{H}\}$  NMR ( $\text{CDCl}_3$ , 100 MHz)  $\delta$  169.3, 168.5, 149.2, 148.0, 129.9, 129.4, 129.1, 128.6, 124.3, 118.1, 116.2, 85.6, 70.5, 62.7, 62.3, 57.2, 14.0, 13.7 ppm; HRMS (ESI)  $m/z$ :  $[\text{M} + \text{H}]^+$  Calcd for  $\text{C}_{24}\text{H}_{26}\text{N}_3\text{O}_5^+$ , 436.1867; found, 436.1868.

**Diethyl 5-(4,5-diphenyl-1*H*-imidazol-1-yl)-2-phenylisoxazolidine-3,4-dicarboxylate (8f)**

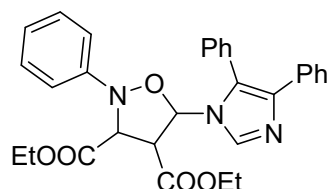

Yellow oil, Yield: 74% (37.9 mg);  $R_f = 0.25$  (PE/EA = 3:1, v/v);  $^1\text{H NMR}$  ( $\text{CDCl}_3$ , 400 MHz)  $\delta$  8.28 (s, 1H), 7.45–7.41 (m, 3H), 7.41 (d,  $J = 2.8$  Hz, 2H), 7.38–7.34 (m, 2H), 7.16–7.11 (m, 4H), 7.10–7.06 (m, 1H), 6.95 (t,  $J = 7.4$  Hz, 1H), 6.88 (d,  $J = 7.7$  Hz, 2H), 5.96 (d,  $J = 5.2$  Hz, 1H), 4.65 (d,  $J = 4.7$  Hz, 1H), 4.35 (t,  $J = 4.9$  Hz, 1H), 4.30–4.23 (m, 2H), 3.92 (q,  $J = 7.1$  Hz, 2H), 1.31 (t,  $J = 7.2$  Hz, 3H), 0.97 (t,  $J = 7.1$  Hz, 3H) ppm;  $^{13}\text{C}\{^1\text{H}\}$  NMR ( $\text{CDCl}_3$ , 100 MHz)  $\delta$  169.0, 168.4, 148.0, 138.2, 135.5, 134.0, 131.3, 129.7, 129.2, 129.0, 128.6, 128.1, 126.7, 126.6, 124.2, 116.1, 84.2, 70.8, 62.8, 62.3, 56.8, 14.1, 13.8 ppm; HRMS (ESI)  $m/z$ :  $[\text{M} + \text{H}]^+$  Calcd for  $\text{C}_{30}\text{H}_{30}\text{N}_3\text{O}_5^+$ , 512.2180; found, 512.2183.

**Diethyl 5-(4-nitro-1*H*-imidazol-1-yl)-2-phenylisoxazolidine-3,4-dicarboxylate (8g)**

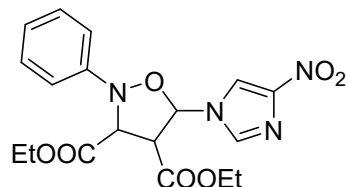

Yellow oil, Yield: 89% (36.0 mg);  $R_f = 0.20$  (PE/EA = 3:1, v/v);  $^1\text{H NMR}$  ( $\text{CDCl}_3$ , 400 MHz)  $\delta$  7.89 (d,  $J = 1.6$  Hz, 1H), 7.39–7.34 (m, 2H), 7.21–7.18 (m, 2H), 7.18–7.17 (m, 1H), 6.45 (d,  $J = 3.6$  Hz, 1H), 6.42 (d,  $J = 5.1$  Hz, 1H), 4.61 (d,  $J = 5.6$  Hz, 1H), 4.30 (q,  $J = 7.1$  Hz, 2H), 4.28–4.20 (m, 3H), 1.31 (t,  $J = 7.2$  Hz, 3H), 1.25 (t,  $J = 7.2$  Hz, 3H) ppm;  $^{13}\text{C}\{^1\text{H}\}$  NMR ( $\text{CDCl}_3$ , 100 MHz)  $\delta$  168.4, 167.7, 146.9, 135.4, 129.3, 125.7, 118.1, 117.7, 86.4, 70.2, 63.0, 59.1, 13.9 ppm; HRMS (ESI)  $m/z$ :  $[\text{M} + \text{H}]^+$  Calcd for  $\text{C}_{18}\text{H}_{21}\text{N}_4\text{O}_7^+$ , 405.1405; found, 405.1407.

### Diethyl 5-(1*H*-benzo[*d*][1,2,3]triazol-1-yl)-2-phenylisoxazolidine-3,4-dicarboxylate (8h)

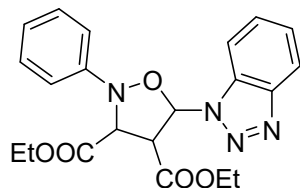

Yellow oil, Yield: 98% (40.2 mg);  $R_f = 0.25$  (PE/EA = 3:1, v/v);  $^1\text{H NMR}$  ( $\text{CDCl}_3$ , 400 MHz)  $\delta$  8.09 (d,  $J = 8.4$  Hz, 1H), 8.05 (d,  $J = 8.4$  Hz, 1H), 7.60–7.55 (m, 1H), 7.32 (dd,  $J = 8.7, 7.4$  Hz, 2H), 7.23–7.19 (m, 2H), 7.12 (t,  $J = 7.4$  Hz, 1H), 7.08 (d,  $J = 4.5$  Hz, 1H), 7.03–6.97 (m, 3H), 5.14 (dd,  $J = 5.6, 4.5$  Hz, 1H), 4.85 (d,  $J = 5.6$  Hz, 1H), 4.39–4.30 (m, 2H), 4.16 (q,  $J = 7.1$  Hz, 2H), 1.32 (t,  $J = 7.2$  Hz, 3H), 1.19 (t,  $J = 7.2$  Hz, 3H) ppm;  $^{13}\text{C}\{^1\text{H}\}$  NMR ( $\text{CDCl}_3$ , 100 MHz)  $\delta$  168.6, 168.4, 148.3, 146.8, 132.0, 129.1, 128.3, 124.6, 124.6, 120.2, 116.7, 111.0, 87.6, 70.3, 62.6, 62.6, 55.8, 14.0, 13.9 ppm; HRMS (ESI)  $m/z$ :  $[\text{M} + \text{H}]^+$  Calcd for  $\text{C}_{21}\text{H}_{23}\text{N}_4\text{O}_5^+$ , 411.1663; found, 411.1667.

### Diethyl 5-(1*H*-indol-1-yl)-2-phenylisoxazolidine-3,4-dicarboxylate (8i)

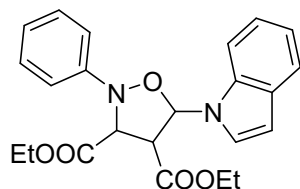

Yellow oil, Yield: 71% (29.0 mg);  $R_f = 0.35$  (PE/EA = 3:1, v/v);  $^1\text{H NMR}$  ( $\text{CDCl}_3$ , 400 MHz)  $\delta$  7.63 (d,  $J = 7.8$  Hz, 1H), 7.58 (d,  $J = 3.4$  Hz, 1H), 7.54 (d,  $J = 8.3$  Hz, 1H), 7.33 (dd,  $J = 8.6, 7.4$  Hz, 2H), 7.29–7.26 (m, 1H), 7.21–7.17 (m, 3H), 7.08 (t,  $J = 7.3$  Hz, 1H), 6.67 (d,  $J = 6.2$  Hz, 1H), 6.64 (d,  $J = 3.4$  Hz, 1H), 4.93 (d,  $J = 4.7$  Hz, 1H), 4.41 (dd,  $J = 6.2, 4.8$  Hz, 1H), 4.45–4.32 (m, 2H), 4.13–4.04 (m, 2H), 1.35 (t,  $J = 7.2$  Hz, 3H), 1.10 (t,  $J = 7.2$  Hz, 3H) ppm;  $^{13}\text{C}\{^1\text{H}\}$  NMR ( $\text{CDCl}_3$ , 100 MHz)  $\delta$  169.7, 169.1, 149.2, 136.2, 129.3, 129.2, 125.0, 123.5, 122.4, 121.2, 120.7, 115.0, 109.6, 104.7, 86.4, 70.6, 62.6, 62.2, 55.8, 14.1, 13.9 ppm; HRMS (ESI)  $m/z$ :  $[\text{M} + \text{H}]^+$  Calcd for  $\text{C}_{23}\text{H}_{25}\text{N}_2\text{O}_5^+$ , 409.1758; found, 409.1762.

## 7. Characterization data of products 11

### Ethyl 2-phenyl-5-(propionyloxy)isoxazolidine-3-carboxylate (11a)

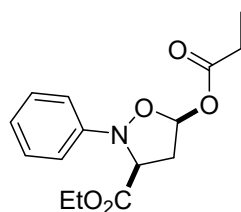

Yellow oil, 16.7 mg, 57% yield. Silica gel TLC  $R_f = 0.20$  (PE:EA = 15:1);  $^1\text{H NMR}$  (600 MHz,  $\text{CDCl}_3$ )  $\delta$  7.29 (t,  $J = 8.4$  Hz, 2H), 7.23 (d,  $J = 8.4$  Hz, 2H), 7.04 (t,  $J = 7.2$  Hz, 1H), 6.63 (d,  $J = 5.4$  Hz, 2H), 4.36–4.30 (m, 2H), 4.21 (dd,  $J = 9.3, 3.0$  Hz, 2H), 2.83–2.75 (m, 2H), 2.41–2.32 (m, 2H), 1.35 (t,  $J = 7.2$  Hz, 3H), 1.14 (t,  $J = 7.2$  Hz, 3H) ppm;  $^{13}\text{C}\{^1\text{H}\}$  NMR (150 MHz,  $\text{CDCl}_3$ )  $\delta$

172.4, 169.2, 149.0, 127.8, 127.5, 122.4, 114.9, 112.9, 93.4, 65.6, 60.9, 37.4, 26.6, 13.1, 7.6 ppm; HRMS (ESI)  $m/z$ :  $[M + H]^+$  Calcd for  $C_{15}H_{20}NO_5^+$ , 294.1336; found, 294.1341.

### Ethyl 5-(cyclohexyloxy)-2-phenylisoxazolidine-3-carboxylate (11b)

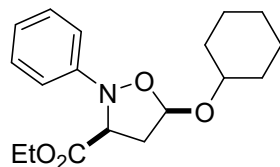

Yellow oil, 16.2 mg, 51% yield. Silica gel TLC  $R_f$  = 0.20 (PE:EA = 10:1);  $^1H$  NMR (600 MHz,  $CDCl_3$ )  $\delta$  7.27–7.25 (m, 2H), 7.06 (d,  $J$  = 7.8 Hz, 2H), 6.99 (t,  $J$  = 7.2, 1H), 5.59 (dd,  $J$  = 5.4, 1.2), 4.36–4.30 (m, 1H), 4.29–4.24 (m, 1H), 4.20 (dd,  $J$  = 6, 2.4, 1H), 3.75–3.71 (m, 1H), 2.68–2.65 (m, 1H), 2.52–2.48 (m, 1H), 1.92–1.91 (m, 2H), 1.73–1.71 (m, 2H), 1.53–1.51 (m, 1H), 1.43–1.37 (m, 1H), 1.33 (t,  $J$  = 14.4, 3H), 1.30–1.26 (m, 3H), 1.23–1.91 (m, 1H);  $^{13}C\{^1H\}$  NMR (150 MHz,  $CDCl_3$ )  $\delta$  170.9, 151.1, 128.7, 122.5, 115.5, 98.8, 67.3, 61.6, 61.6, 38.4, 33.3, 31.4, 25.7, 24.0, 23.9, 14.27 ppm; HRMS (ESI)  $m/z$ :  $[M + H]^+$  Calcd for  $C_{18}H_{26}NO_4^+$ , 320.1856; found, 320.1851.

## 8. References

(1) (a) Shi, T.; Teng, S.; Wei, Y.; Guo, X.; Hu, W. Synthesis of Spiro[2,3-dihydrofuran-3,3'-oxindole] Derivatives via a Multi-component Cascade Reaction of  $\alpha$ -Diazo Esters, Water, Isatins and Malononitrile/Ethyl Cyanoacetate. *Green Chem.* **2019**, *21*, 4936. (b) Gallo, R. D. C.; Burtoloso, A. C. B. Silica-supported  $HClO_4$  Promotes Catalytic Solvent- and Metal-Free O-H Insertion Reactions with Diazo Compounds. *Green Chem.* **2018**, *20*, 4547.

(2) Synthesis of nitrosoarenes, See: (a) Prewisch, B.; Rück-Braun, K. Efficient Preparation of Nitrosoarenes for the Synthesis of Azobenzenes. *J. Org. Chem.* **2005**, *70*, 2350. (b) Hu, W.; Yu, J.-T.; Liu, S.; Jiang, Y.; Cheng, J. Copper-mediated Annulation of 2-(1-Arylviny) Anilines and Aryl Nitrosos towards 2,3-Diaryl-2H-indazoles. *Org. Chem. Front.* **2017**, *4*, 22. (c) Wang, Q.; Li, X. Synthesis of 1H-Indazoles from Imidates and Nitrosobenzenes via Synergistic Rhodium/Copper Catalysis. *Org. Lett.* **2016**, *18*, 2102.

(3) (a) Buslov, I.; Hu, X. Transition-Metal-Free Intermolecular  $\alpha$ -C-H Amination of Ethers at Room Temperature. *Adv. Synth. Catal.* **2014**, *356*, 3325. (b) Xie, M.-S.; Zhou, P.; Niu, H.-Y.; Qu, G.-R.; Guo, H.-M. Enantioselective Intermolecular Cyclopropanations for the Synthesis of Chiral Pyrimidine Carbocyclic Nucleosides. *Org. Lett.* **2016**, *18*, 4344.

(4) (a) Yang, Q.-L.; Xie, M.-S.; Xia, C.; Sun, H.-L.; Zhang, D.-J.; Huang, K.-X.; Guo, Z.; Qu, G.-R.; Guo, H.-M. A Rapid and Divergent access to Chiral Azacyclic Nucleoside Analogues via Highly Enantioselective 1,3-Dipolar Cycloaddition of  $\beta$ -Nucleobase Substituted Acrylates. *Chem. Commun.* **2014**, *50*, 14809. (b) Gao, Y.-W.; Niu, H.-Y.; Zhang, Q.-Y.; Xie, M.-S.; Qu, G.-R.; Guo, H.-M. Regio- and Enantioselective [3+2] Cycloaddition of

$\alpha$ -Purine Substituted Acrylates with Allenes: An Approach to Chiral Carbocyclic Nucleosides. *Adv. Synth. Catal.* **2018**, *360*, 2813. (c) Huang, K.-X.; Xie, M.-S.; Zhao, G.-F.; Qu, G.-R.; Guo, H.-M. Synthesis of Chiral Cyclopropyl Carbocyclic Purine Nucleosides via Asymmetric Intramolecular Cyclopropanations Catalyzed by a Chiral Ruthenium(II) Complex. *Adv. Synth. Catal.* **2016**, *358*, 3627. (d) Wei, T.; Xie, M.-S.; Qu, G.-R.; Niu, H.-Y.; Guo, H.-M. A New Strategy To Construct Acyclic Nucleosides via Ag(I)-Catalyzed Addition of Pronucleophiles to 9-Allenyl-9H-Purines. *Org. Lett.* **2014**, *16*, 900.

## 9. $^1\text{H-NMR}$ and $^{13}\text{C-NMR}$ spectra of substrate **3g**

**3g**

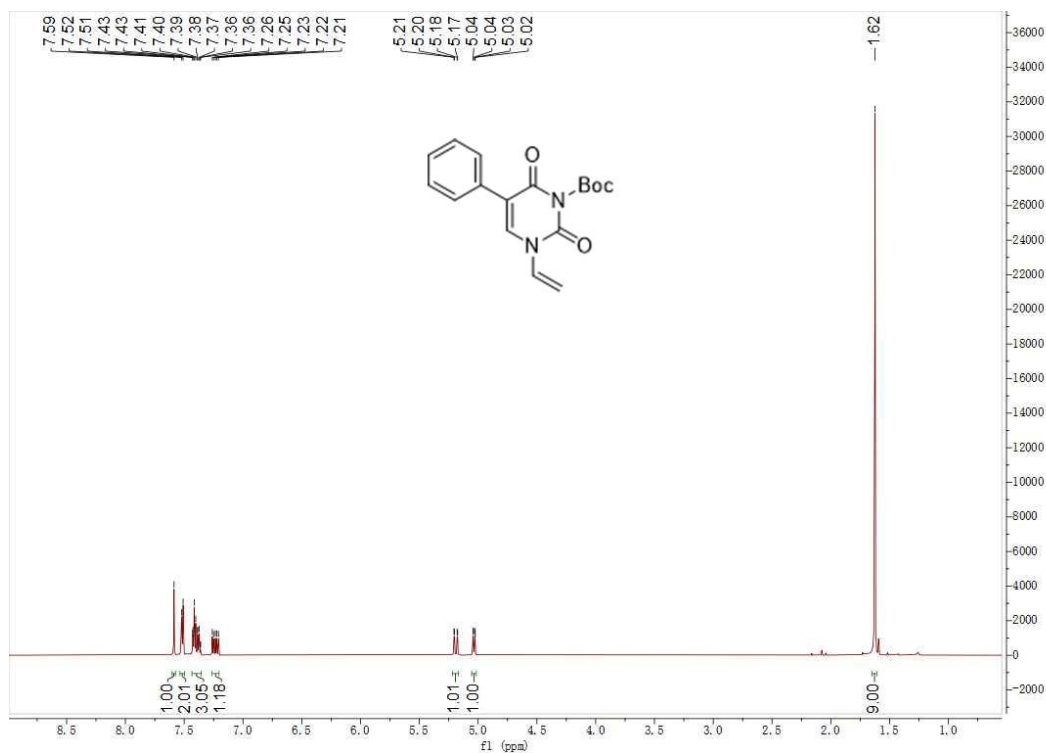



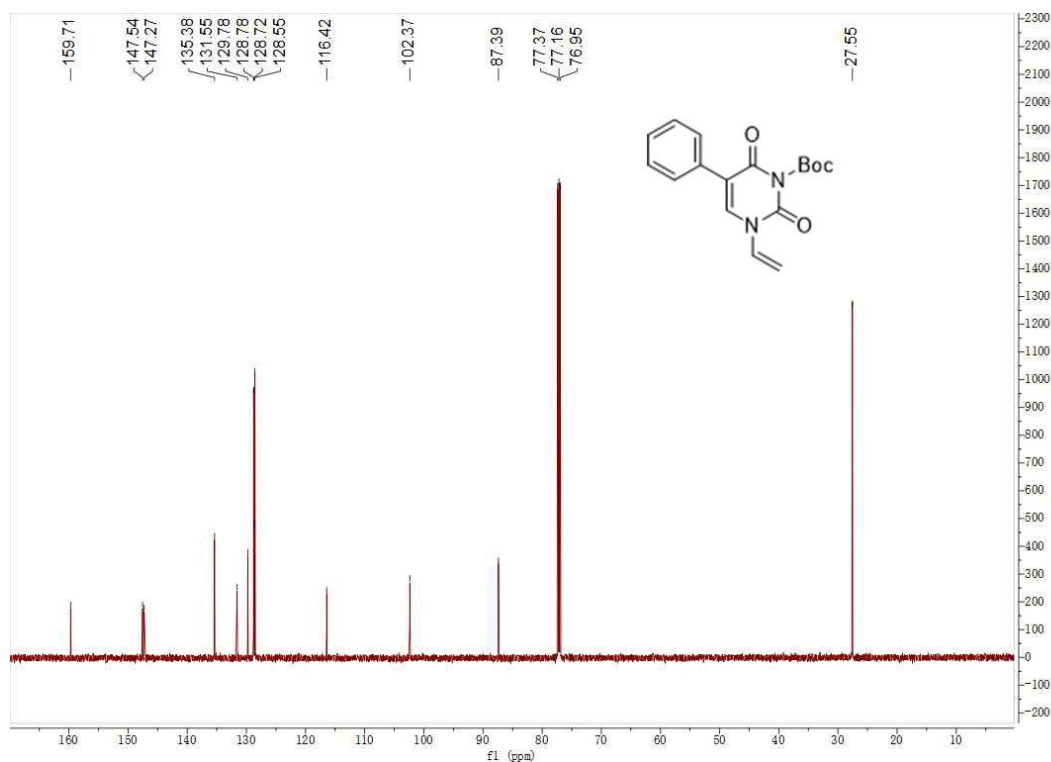

## 10. <sup>1</sup>H- and <sup>13</sup>C-NMR spectra of products 4

4a

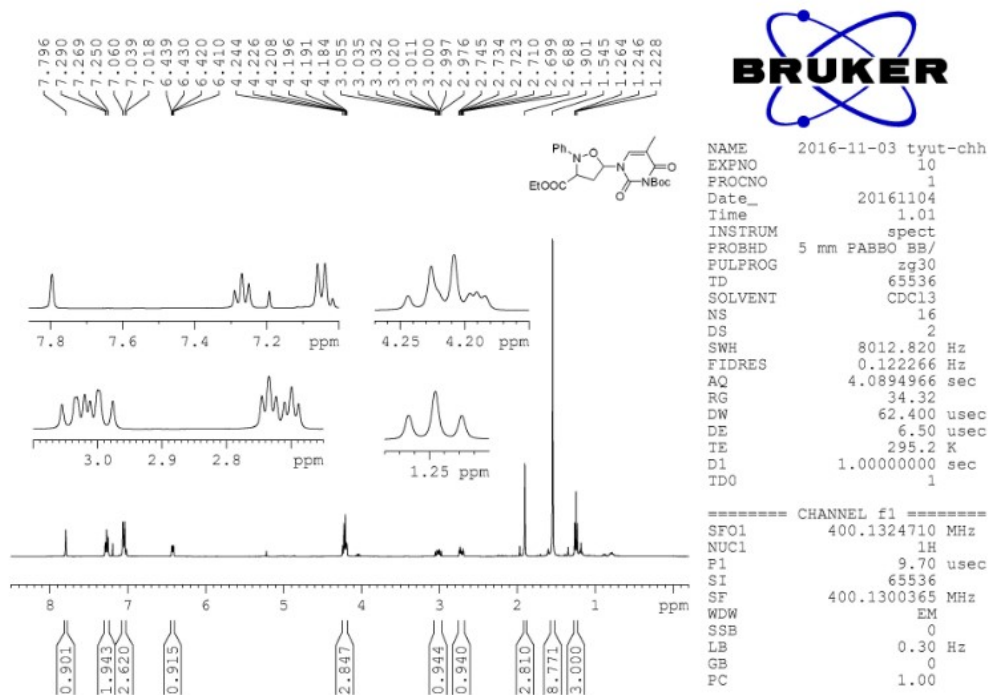



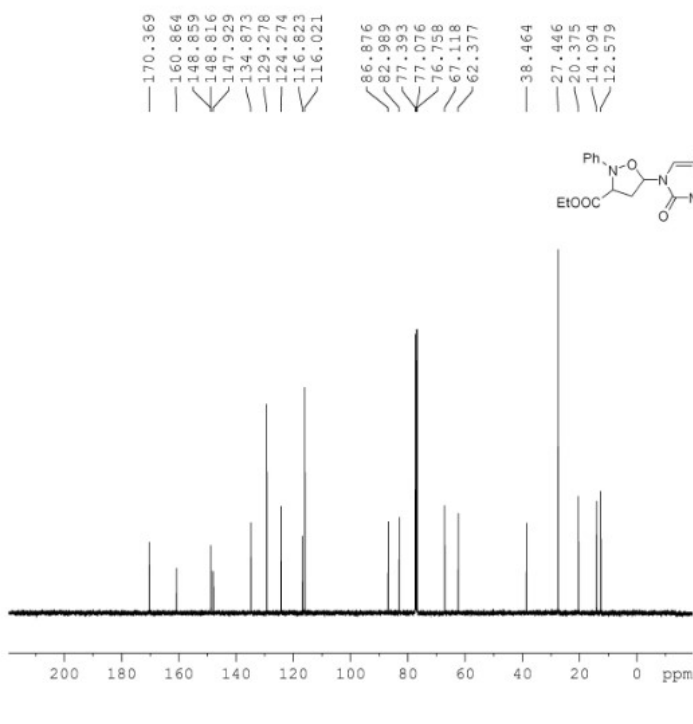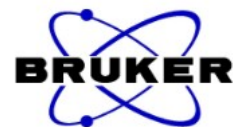

```

NAME      2016-12-14 tyut-chh
EXPNO    11
PROCNO   1
Date_    20161214
Time     22.06
INSTRUM  spect
PROBHD   5 mm PABBO BB/
PULPROG  zgpg30
TD       65536
SOLVENT  CDCl3
NS       299
DS       4
SWH      24038.461 Hz
FIDRES   0.366798 Hz
AQ       1.3631988 sec
RG       185.43
DW       20.800 usec
DE       6.50 usec
TE       293.3 K
D1       2.00000000 sec
D11      0.03000000 sec
TD0     1
  
```

```

===== CHANNEL f1 =====
SFO1    100.6228293 MHz
NUC1    13C
P1      9.50 usec
SI     32768
SF     100.6127690 MHz
WDW     EM
SSB     0
LB     1.00 Hz
GB     0
PC     1.40
  
```

4c

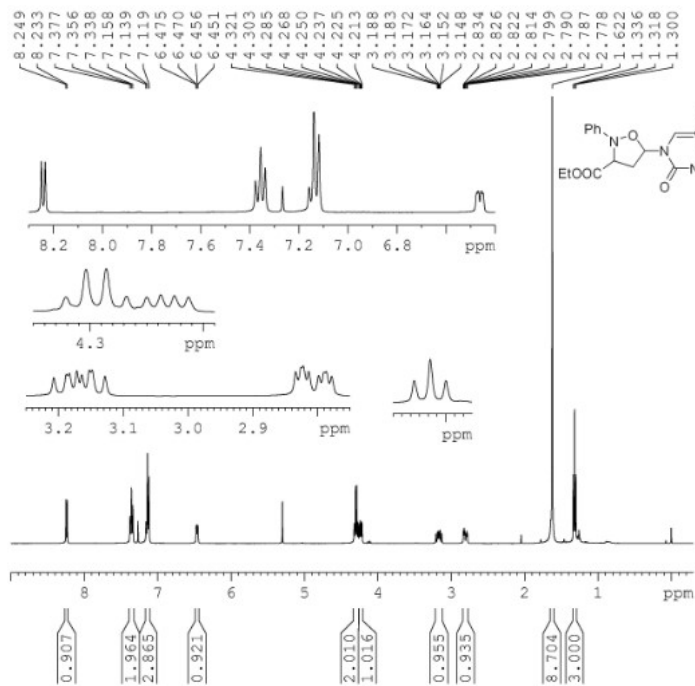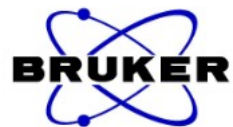

```

NAME      2016-12-13 TYUT-CI
EXPNO    10
PROCNO   1
Date_    20161213
Time     20.06
INSTRUM  spect
PROBHD   5 mm PABBO BB/
PULPROG  zg30
TD       65536
SOLVENT  CDCl3
NS       16
DS       2
SWH      8012.820 Hz
FIDRES   0.122266 Hz
AQ       4.0894966 sec
RG       34.32
DW       62.400 usec
DE       6.50 usec
TE       292.6 K
D1       1.00000000 sec
TD0     1
  
```

```

===== CHANNEL f1 =====
SFO1    400.1324710 MHz
NUC1    1H
P1     9.70 usec
SI     65536
SF     400.1300076 MHz
WDW     EM
SSB     0
LB     0.30 Hz
GB     0
PC     1.00
  
```

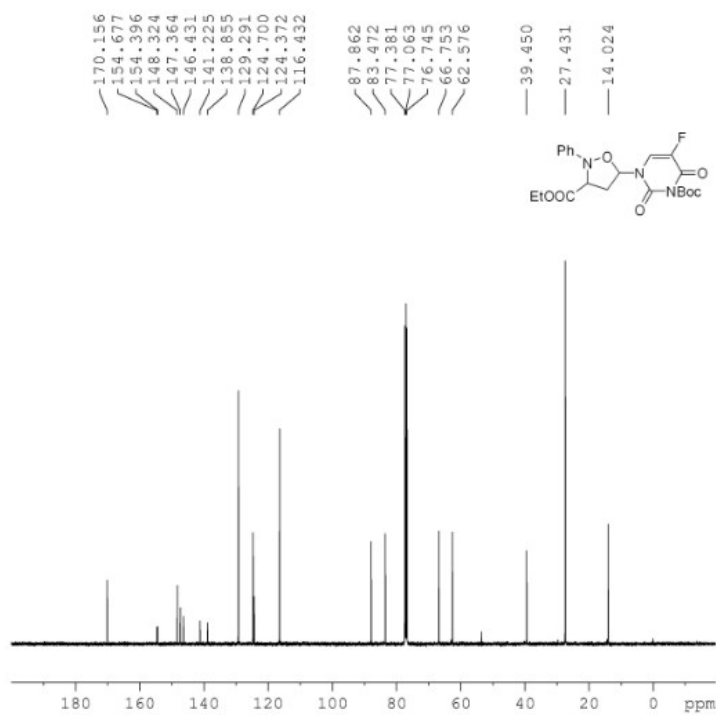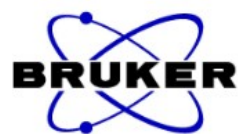

NAME 2016-12-13 TYUT-CHH  
 EXPNO 11  
 PROCNO 1  
 Date\_ 20161213  
 Time 21.05  
 INSTRUM spect  
 PROBHD 5 mm PABBO BB/  
 PULPROG zgpg30  
 TD 65536  
 SOLVENT CDCl3  
 NS 1024  
 DS 4  
 SWH 24038.461 Hz  
 FIDRES 0.366798 Hz  
 AQ 1.3631988 sec  
 RG 185.43  
 DW 20.800 usec  
 DE 6.50 usec  
 TE 293.5 K  
 D1 2.00000000 sec  
 D11 0.03000000 sec  
 TD0 1

===== CHANNEL f1 =====  
 SFO1 100.6228293 MHz  
 NUC1 13C  
 P1 9.50 usec  
 SI 32768  
 SF 100.6127690 MHz  
 WDW EM  
 SSB 0  
 LB 1.00 Hz  
 GB 0  
 PC 1.40

4d

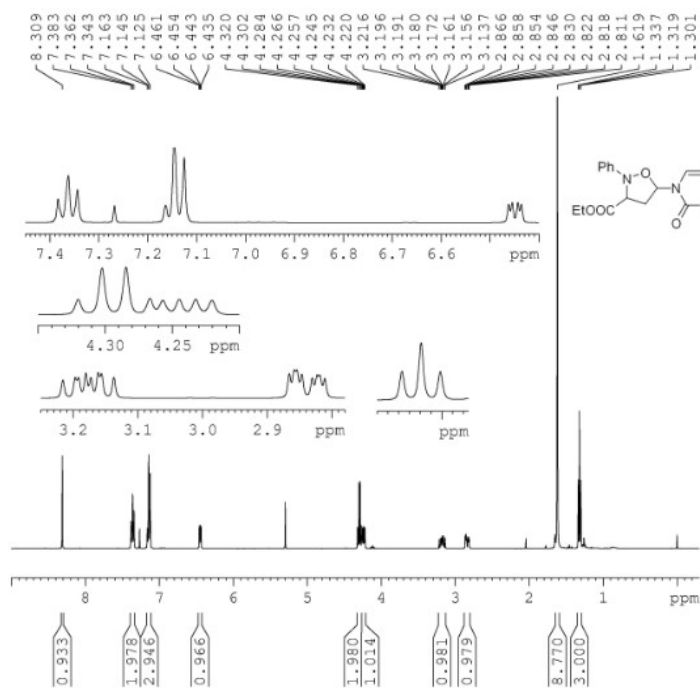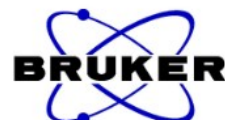

NAME 2016-12-13 TYUT-CI  
 EXPNO 10  
 PROCNO 1  
 Date\_ 20161213  
 Time 21.10  
 INSTRUM spect  
 PROBHD 5 mm PABBO BB/  
 PULPROG zg30  
 TD 65536  
 SOLVENT CDCl3  
 NS 16  
 DS 2  
 SWH 8012.820 Hz  
 FIDRES 0.122266 Hz  
 AQ 4.0894966 sec  
 RG 34.32  
 DW 62.400 usec  
 DE 6.50 usec  
 TE 292.8 K  
 D1 1.00000000 sec  
 TD0 1

===== CHANNEL f1 =====  
 SFO1 400.1324710 MHz  
 NUC1 1H  
 P1 9.70 usec  
 SI 65536  
 SF 400.1300071 MHz  
 WDW EM  
 SSB 0  
 LB 0.30 Hz  
 GB 0  
 PC 1.00

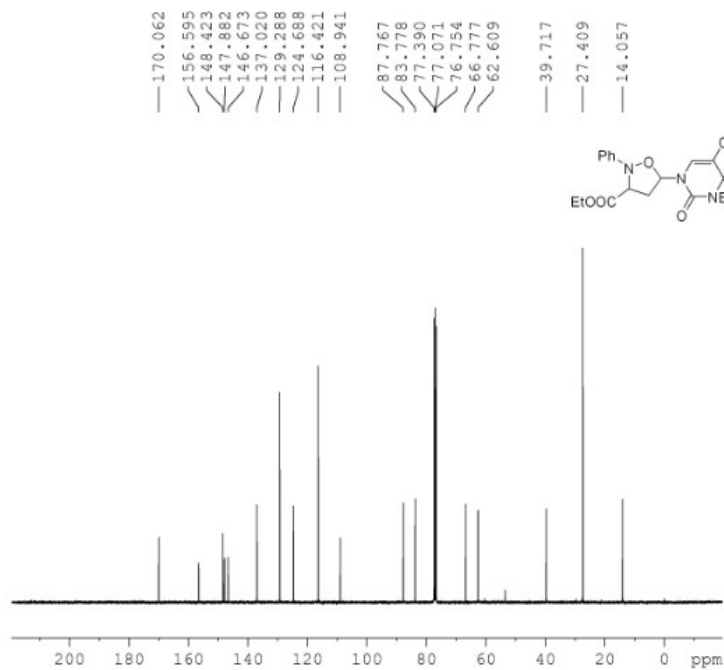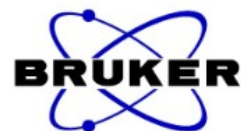

NAME 2016-12-13 TYUT-CHH  
 EXPNO 11  
 PROCNO 1  
 Date\_ 20161213  
 Time 22.09  
 INSTRUM spect  
 PROBHD 5 mm PABBO BB/  
 PULPROG zgpg30  
 TD 65536  
 SOLVENT CDCl3  
 NS 1024  
 DS 4  
 SWH 24038.461 Hz  
 FIDRES 0.366798 Hz  
 AQ 1.3631988 sec  
 RG 185.43  
 DW 20.800 usec  
 DE 6.50 usec  
 TE 293.5 K  
 D1 2.0000000 sec  
 D11 0.0300000 sec  
 TDO 1

===== CHANNEL f1 =====  
 SF01 100.6228293 MHz  
 NUC1 13C  
 P1 9.50 usec  
 SI 32768  
 SF 100.6127690 MHz  
 WDW EM  
 SSB 0  
 LB 1.00 Hz  
 GB 0  
 PC 1.40

4e

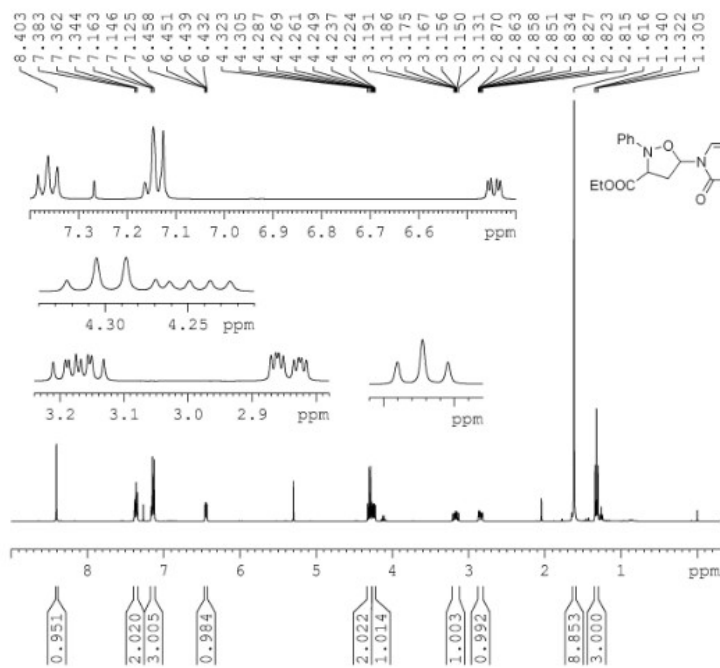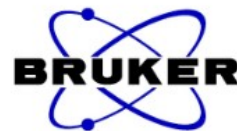

NAME 2016-12-30 tytu-chn  
 EXPNO 10  
 PROCNO 1  
 Date\_ 20161230  
 Time 22.32  
 INSTRUM spect  
 PROBHD 5 mm PABBO BB/  
 PULPROG zg30  
 TD 65536  
 SOLVENT CDCl3  
 NS 16  
 DS 2  
 SWH 8012.820 Hz  
 FIDRES 0.122266 Hz  
 AQ 4.0894966 sec  
 RG 34.32  
 DW 62.400 usec  
 DE 6.50 usec  
 TE 292.7 K  
 D1 1.0000000 sec  
 TDO 1

===== CHANNEL f1 =====  
 SF01 400.1324710 MHz  
 NUC1 1H  
 P1 9.70 usec  
 SI 65536  
 SF 400.1300069 MHz  
 WDW EM  
 SSB 0  
 LB 0.30 Hz  
 GB 0  
 PC 1.00

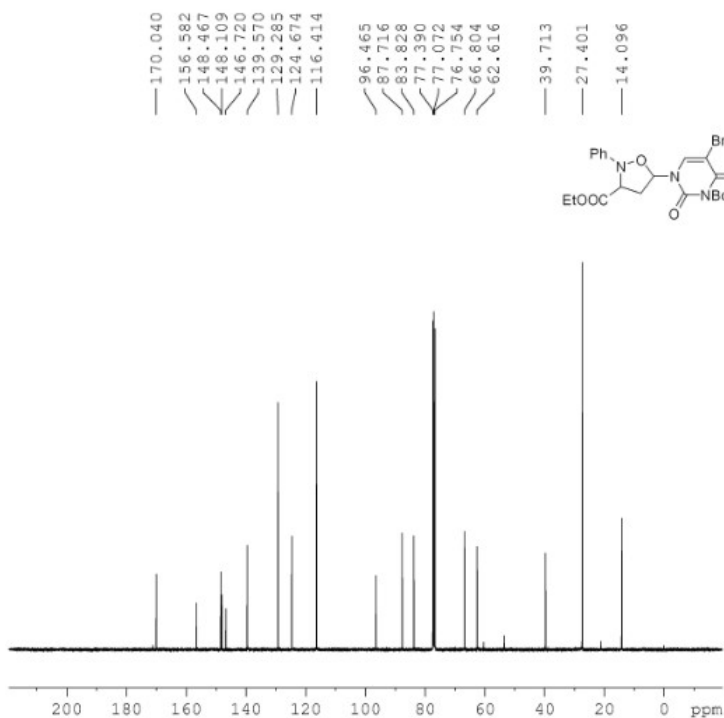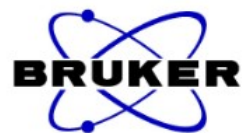

NAME 2016-12-30 tytu-chh  
 EXPNO 11  
 PROCNO 1  
 Date\_ 20161230  
 Time 23.31  
 INSTRUM spect  
 PROBHD 5 mm PABBO BB/  
 PULPROG zgpg30  
 TD 65536  
 SOLVENT CDCl3  
 NS 1024  
 DS 4  
 SWH 24038.461 Hz  
 FIDRES 0.366798 Hz  
 AQ 1.3631988 sec  
 RG 185.43  
 DW 20.800 usec  
 DE 6.50 usec  
 TE 293.6 K  
 D1 2.00000000 sec  
 D11 0.03000000 sec  
 TD0 1

===== CHANNEL f1 =====  
 SFO1 100.6228293 MHz  
 NUC1 13C  
 P1 9.50 usec  
 SI 32768  
 SF 100.6127690 MHz  
 WDW EM  
 SSB 0  
 LB 1.00 Hz  
 GB 0  
 PC 1.40

4f

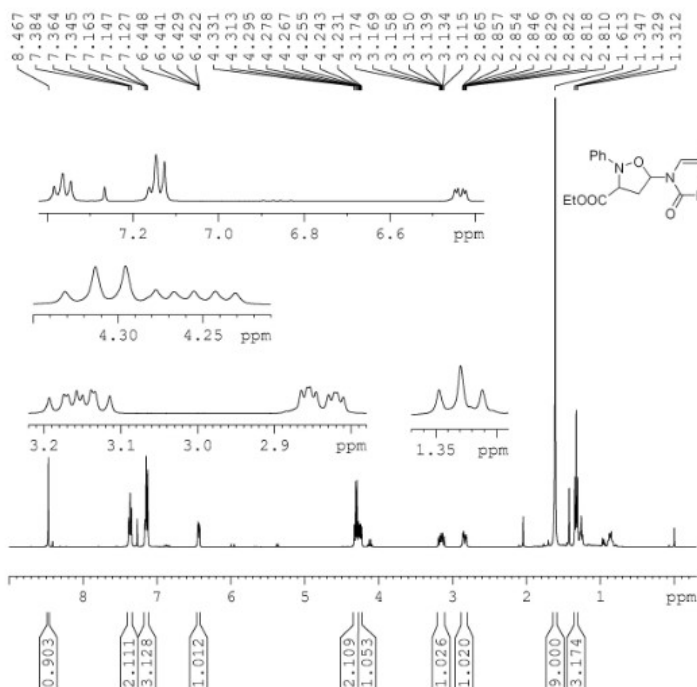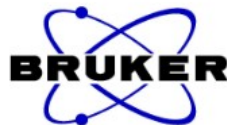

NAME 2016-12-14 tyut-chh  
 EXPNO 10  
 PROCNO 1  
 Date\_ 20161214  
 Time 21.28  
 INSTRUM spect  
 PROBHD 5 mm PABBO BB/  
 PULPROG zg30  
 TD 65536  
 SOLVENT CDCl3  
 NS 16  
 DS 2  
 SWH 8012.820 Hz  
 FIDRES 0.122266 Hz  
 AQ 4.0894966 sec  
 RG 34.32  
 DW 62.400 usec  
 DE 6.50 usec  
 TE 292.4 K  
 D1 1.00000000 sec  
 TD0 1

===== CHANNEL f1 =====  
 SFO1 400.1324710 MHz  
 NUC1 1H  
 P1 9.70 usec  
 SI 65536  
 SF 400.1300081 MHz  
 WDW EM  
 SSB 0  
 LB 0.30 Hz  
 GB 0  
 PC 1.00

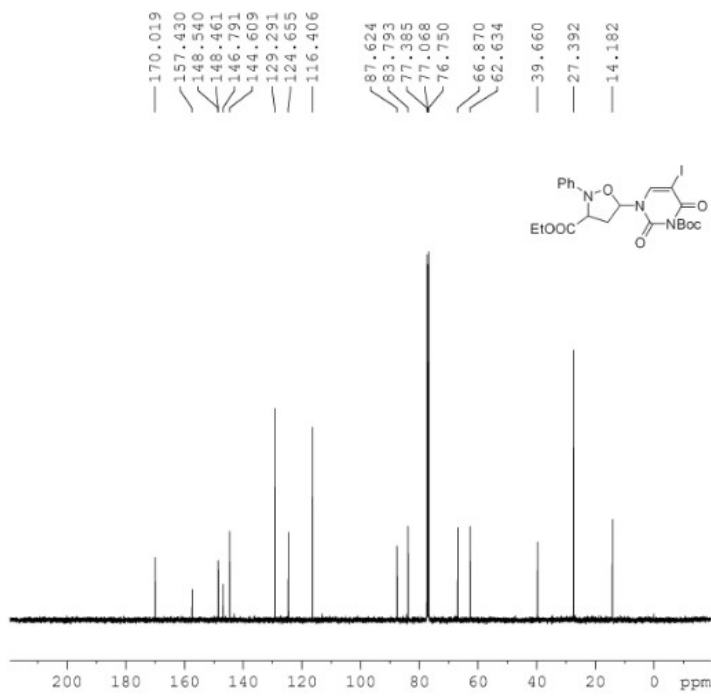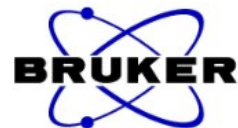

```

NAME      2016-12-14 tyut-chh
EXPNO    11
PROCNO   1
Date_    20161214
Time     21.30
INSTRUM  spect
PROBHD   5 mm PABBO BB/
PULPROG  zgpg30
TD       65536
SOLVENT  CDCl3
NS       399
DS       4
SWH      24038.461 Hz
FIDRES   0.366798 Hz
AQ       1.3631988 sec
RG       185.43
DW       20.800 usec
DE       6.50 usec
TE       292.8 K
D1       2.00000000 sec
D11      0.03000000 sec
TD0      1
  
```

```

===== CHANNEL f1 =====
SFO1    100.6228293 MHz
NUC1     13C
P1       9.50 usec
SI       32768
SF       100.6127690 MHz
WDW      EM
SSB      0
LB       1.00 Hz
GB       0
PC       1.40
  
```

4g

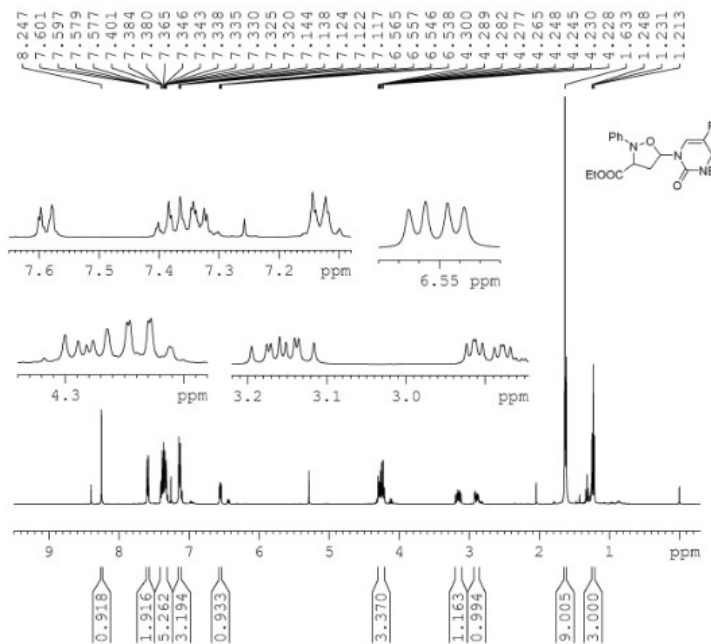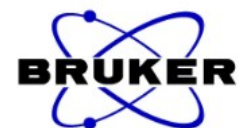

```

NAME      2017-01-09 tyut-lx-
EXPNO    10
PROCNO   1
Date_    20170110
Time     4.24
INSTRUM  spect
PROBHD   5 mm PABBO BB/
PULPROG  zg30
TD       65536
SOLVENT  CDCl3
NS       16
DS       2
SWH      8012.820 Hz
FIDRES   0.122266 Hz
AQ       4.0894966 sec
RG       34.32
DW       62.400 usec
DE       6.50 usec
TE       293.6 K
D1       1.00000000 sec
TD0      1
  
```

```

===== CHANNEL f1 =====
SFO1    400.1324710 MHz
NUC1     1H
P1       9.70 usec
SI       65536
SF       400.1300104 MHz
WDW      EM
SSB      0
LB       0.30 Hz
GB       0
PC       1.00
  
```

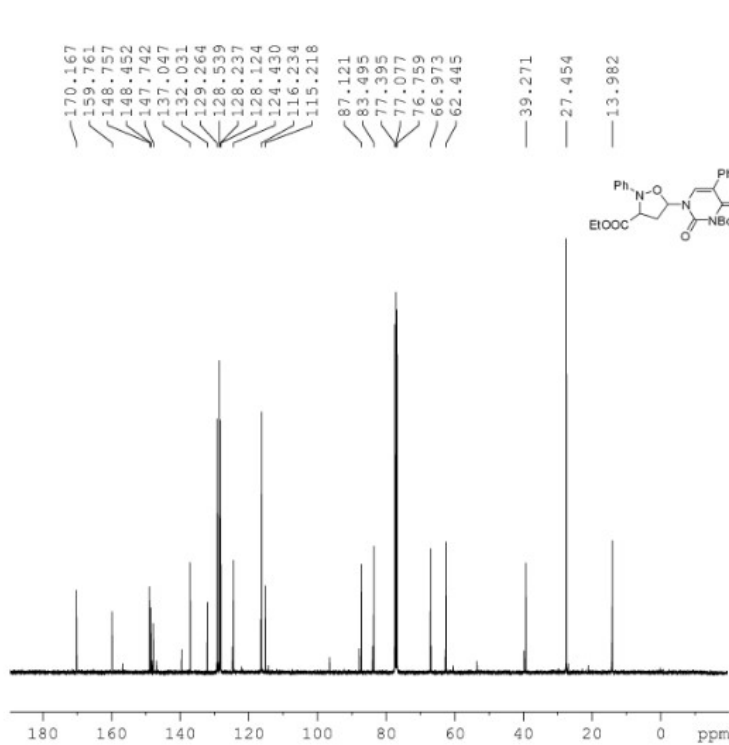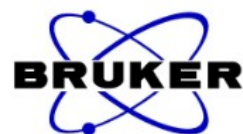

```

NAME      2017-01-09 tyut-lx-
EXPNO    11
PROCNO   1
Date_    20170110
Time     5.23
INSTRUM  spect
PROBHD   5 mm PABBO BB/
PULPROG  zgpg30
TD       65536
SOLVENT  CDCl3
NS       1024
DS       4
SWH      24038.461 Hz
FIDRES   0.366798 Hz
AQ       1.3631988 sec
RG       185.43
DW       20.800 usec
DE       6.50 usec
TE       294.2 K
D1       2.00000000 sec
D11      0.03000000 sec
TD0      1
  
```

```

===== CHANNEL f1 =====
SFO1     100.6228293 MHz
NUC1     13C
P1       9.50 usec
SI       32768
SF       100.6127690 MHz
WDW      EM
SSB      0
LB       1.00 Hz
GB       0
PC       1.40
  
```

4h

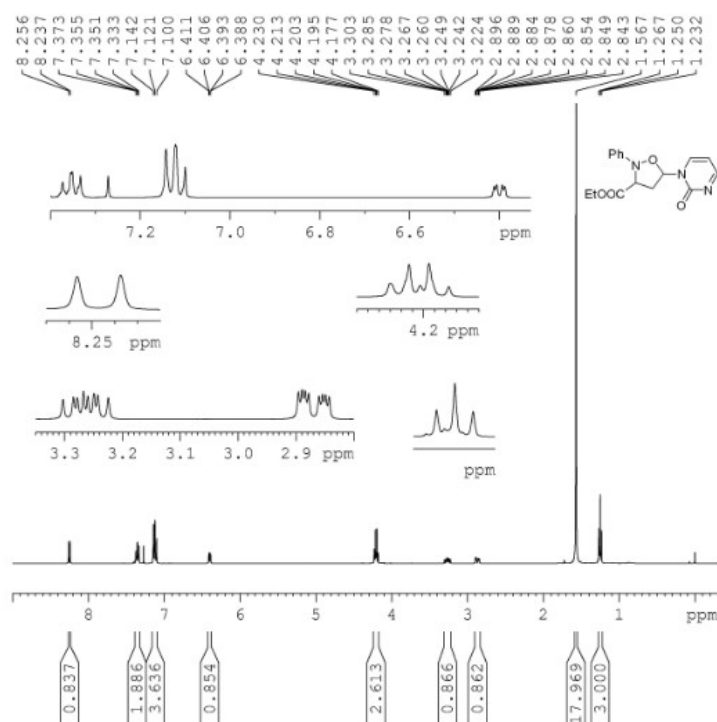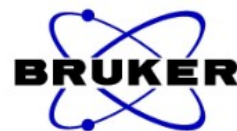

```

NAME      2016-12-30 tytu-chh
EXPNO    10
PROCNO   1
Date_    20161230
Time     23.35
INSTRUM  spect
PROBHD   5 mm PABBO BB/
PULPROG  zg30
TD       65536
SOLVENT  CDCl3
NS       16
DS       2
SWH      8012.820 Hz
FIDRES   0.122266 Hz
AQ       4.0894966 sec
RG       34.32
DW       62.400 usec
DE       6.50 usec
TE       292.9 K
D1       1.00000000 sec
TD0      1
  
```

```

===== CHANNEL f1 =====
SFO1     400.1324710 MHz
NUC1     1H
P1       9.70 usec
SI       65536
SF       400.1300056 MHz
WDW      EM
SSB      0
LB       0.30 Hz
GB       0
PC       1.00
  
```



170.086  
162.690  
154.505  
149.519  
148.948  
144.052  
129.182  
124.256  
116.201

95.954  
85.076  
84.930  
77.377  
77.059  
76.742  
66.594  
62.208

40.655  
27.708  
14.030

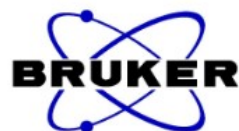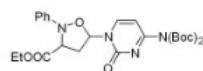

NAME 2016-12-30 tytu-chh  
EXPNO 11  
PROCNO 1  
Date\_ 20161231  
Time 0.34  
INSTRUM spect  
PROBHD 5 mm PABBO BB/  
PULPROG zgpg30  
ID 65536  
SOLVENT CDCl3  
NS 1024  
DS 4  
SWH 24038.461 Hz  
FIDRES 0.366798 Hz  
AQ 1.3631988 sec  
RG 185.43  
DW 20.800 usec  
DE 6.50 usec  
TE 293.7 K  
D1 2.0000000 sec  
D11 0.0300000 sec  
TD0 1

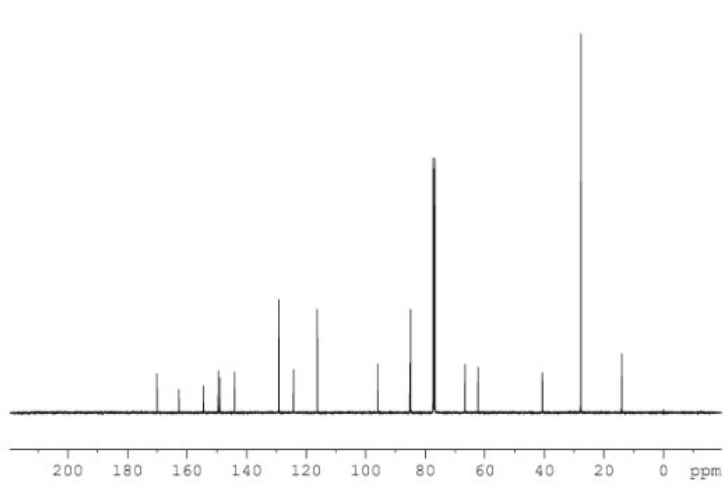

----- CHANNEL f1 -----  
SFO1 100.6228293 MHz  
NUC1 13C  
P1 9.50 usec  
SI 32768  
SF 100.6127690 MHz  
WDW EM  
SSB 0  
LB 1.00 Hz  
GB 0  
PC 1.40

*cis-4i*

8.096  
8.094  
7.260  
7.247  
7.170  
6.499  
6.493  
6.486  
6.480

4.212  
4.201  
4.197  
4.186  
4.168  
4.156  
4.144  
4.132  
3.302  
3.251  
2.835  
2.795  
2.365  
1.990  
1.607  
1.207  
1.195  
1.183

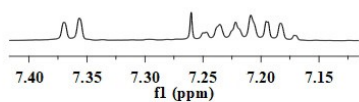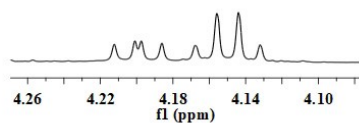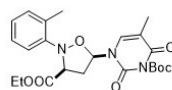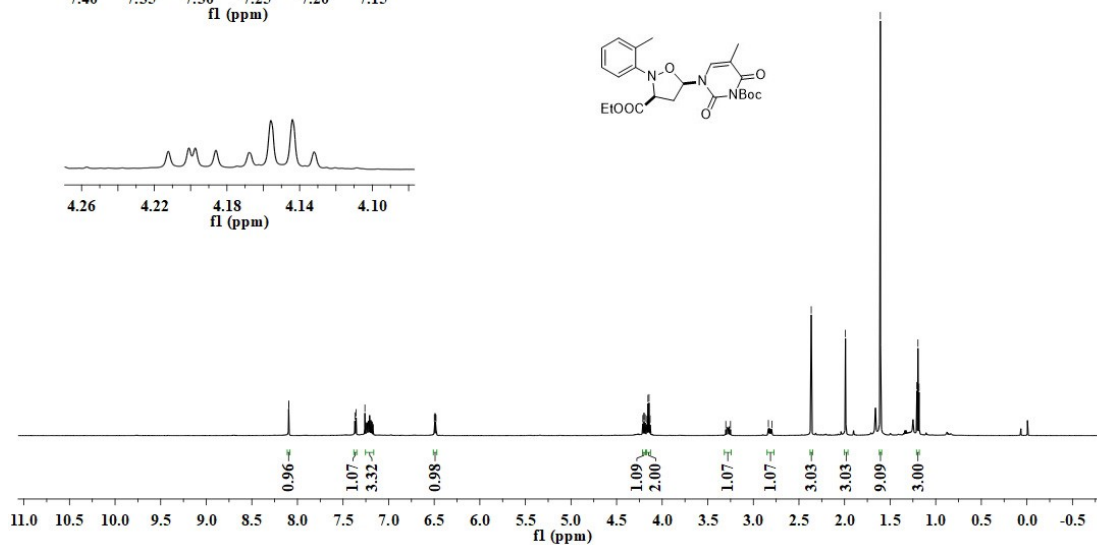



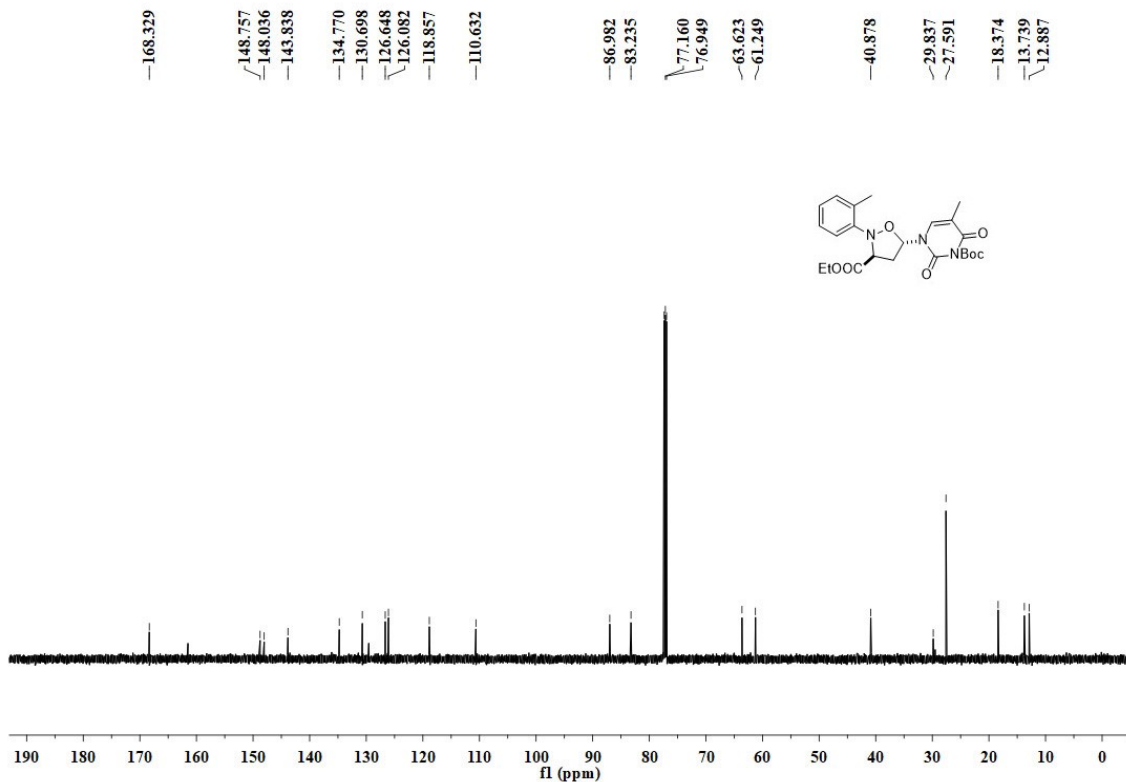

4j

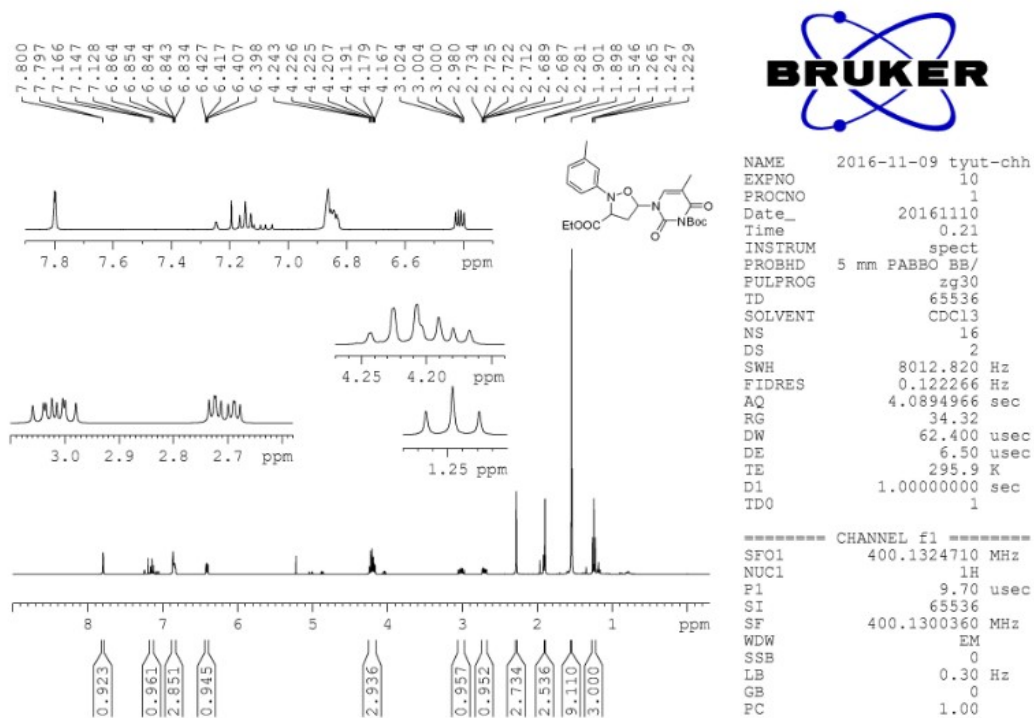

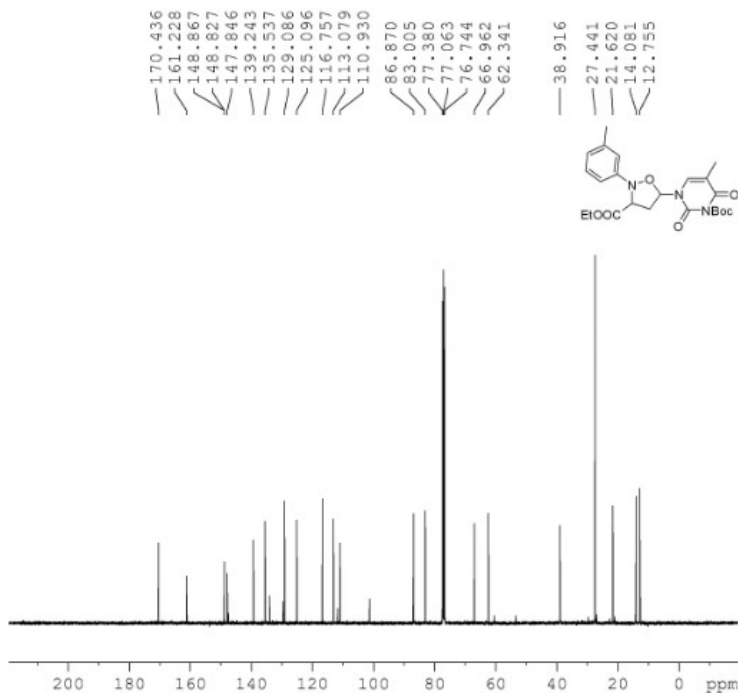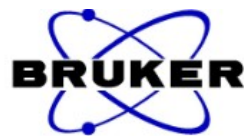

NAME 2016-11-09 tyut-chh  
 EXPNO 11  
 PROCNO 1  
 Date\_ 20161110  
 Time 1.20  
 INSTRUM spect  
 PROBHD 5 mm PABBO BB/  
 PULPROG zgpg30  
 TD 65536  
 SOLVENT CDCl3  
 NS 1024  
 DS 4  
 SWH 24038.461 Hz  
 FIDRES 0.366798 Hz  
 AQ 1.3631988 sec  
 RG 185.43  
 DW 20.800 usec  
 DE 6.50 usec  
 TE 296.5 K  
 D1 2.00000000 sec  
 D11 0.03000000 sec  
 TDO 1

===== CHANNEL f1 =====  
 SFO1 100.6228293 MHz  
 NUC1 13C  
 P1 9.50 usec  
 SI 32768  
 SF 100.6127690 MHz  
 WDW EM  
 SSB 0  
 LB 1.00 Hz  
 GB 0  
 PC 1.40

4k

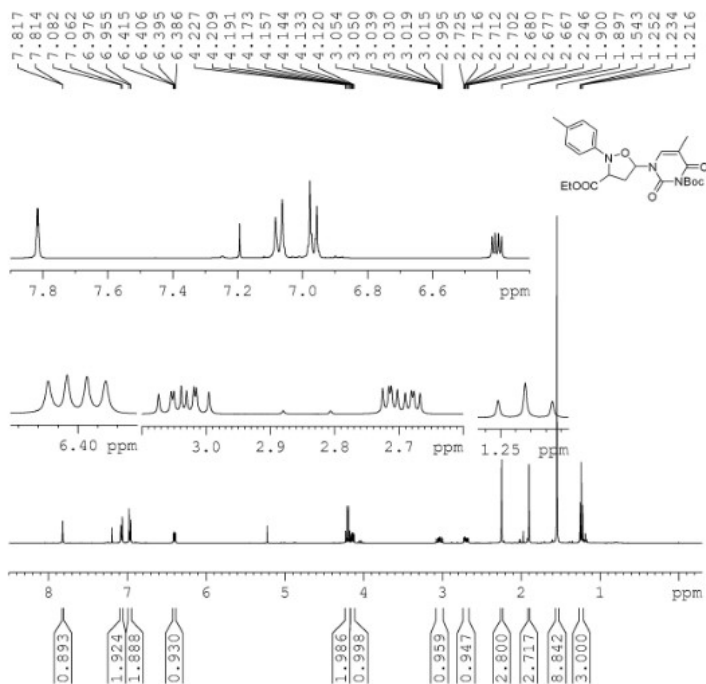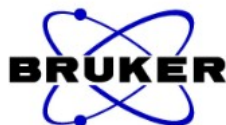

NAME 2016-11-10 tyut-chh  
 EXPNO 10  
 PROCNO 1  
 Date\_ 20161110  
 Time 23.37  
 INSTRUM spect  
 PROBHD 5 mm PABBO BB/  
 PULPROG zg30  
 TD 65536  
 SOLVENT CDCl3  
 NS 16  
 DS 2  
 SWH 8012.820 Hz  
 FIDRES 0.122266 Hz  
 AQ 4.0894966 sec  
 RG 34.32  
 DW 62.400 usec  
 DE 6.50 usec  
 TE 295.6 K  
 D1 1.00000000 sec  
 TDO 1

===== CHANNEL f1 =====  
 SFO1 400.1324710 MHz  
 NUC1 1H  
 P1 9.70 usec  
 SI 65536  
 SF 400.1300363 MHz  
 WDW EM  
 SSB 0  
 LB 0.30 Hz  
 GB 0  
 PC 1.00

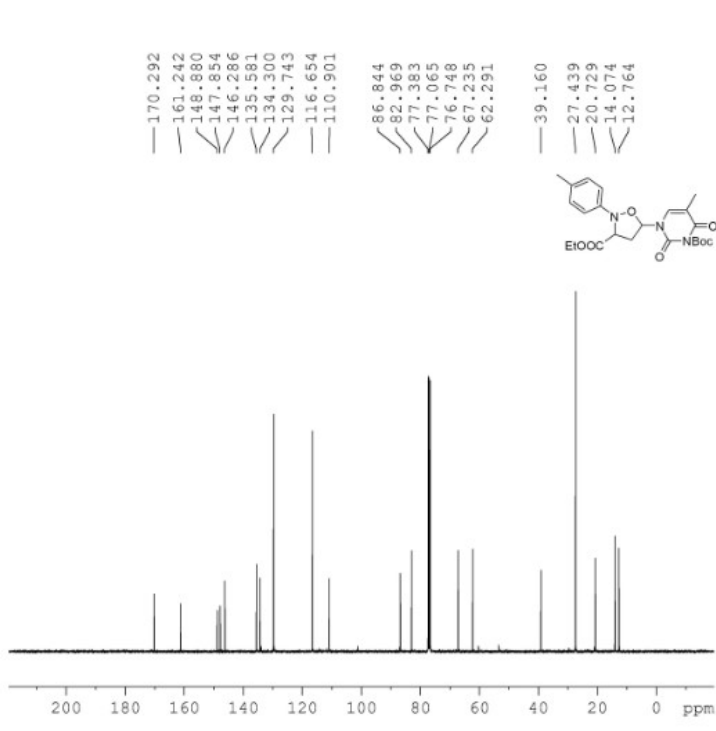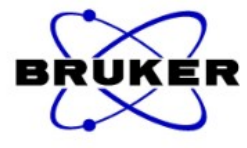

```

NAME      2016-11-10 tyut-chh
EXPNO     11
PROCNO    1
Date_     20161111
Time      0.35
INSTRUM   spect
PROBHD    5 mm PABBO BB/
PULPROG   zgpg30
TD         65536
SOLVENT   CDCl3
NS         1024
DS         4
SWH       24038.461 Hz
FIDRES    0.366798 Hz
AQ        1.3631988 sec
RG         185.43
DW        20.800 usec
DE         6.50 usec
TE        296.3 K
D1        2.00000000 sec
D11       0.03000000 sec
TD0       1

===== CHANNEL f1 =====
SF01     100.6228293 MHz
NUC1      13C
P1        9.50 usec
SI        32768
SF        100.6127690 MHz
WDW       EM
SSB       0
LB        1.00 Hz
GB        0
PC        1.40
  
```

*cis-4n*

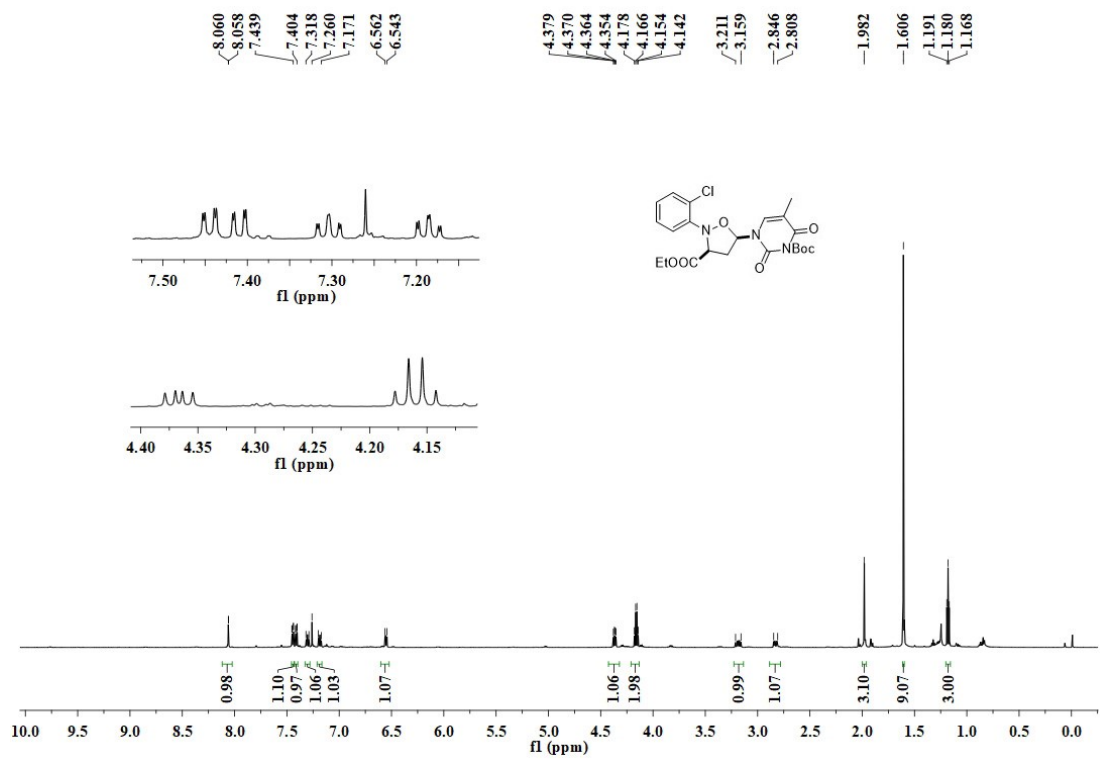

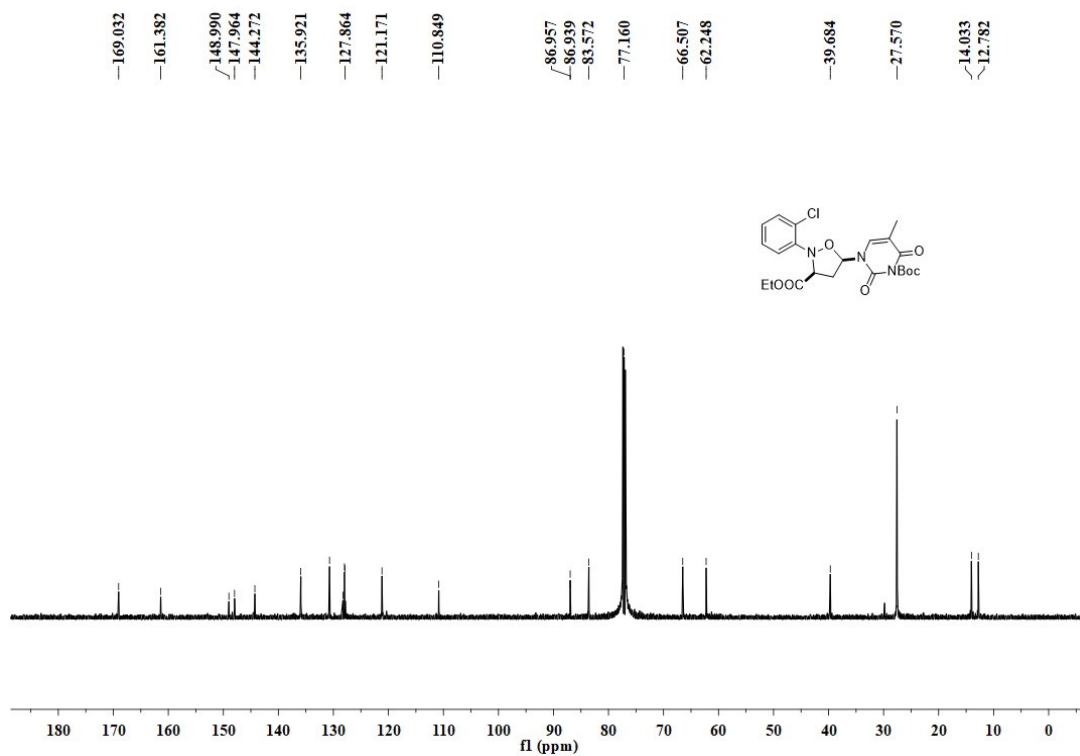

*trans-4n*

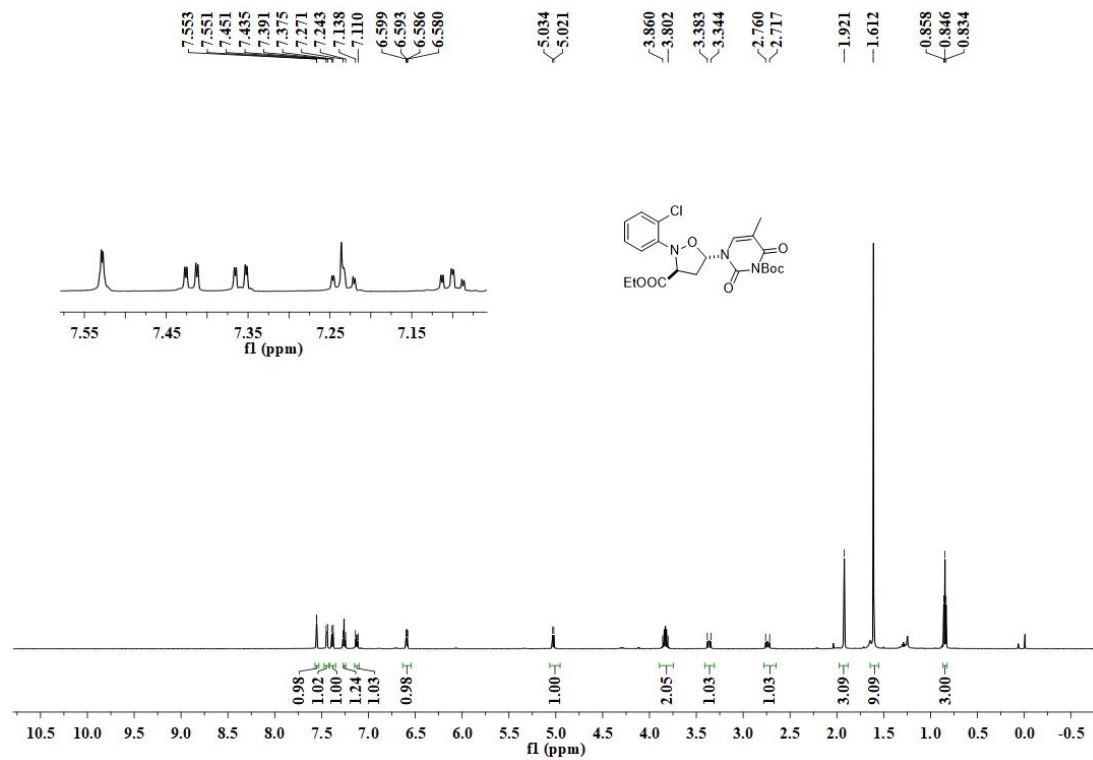

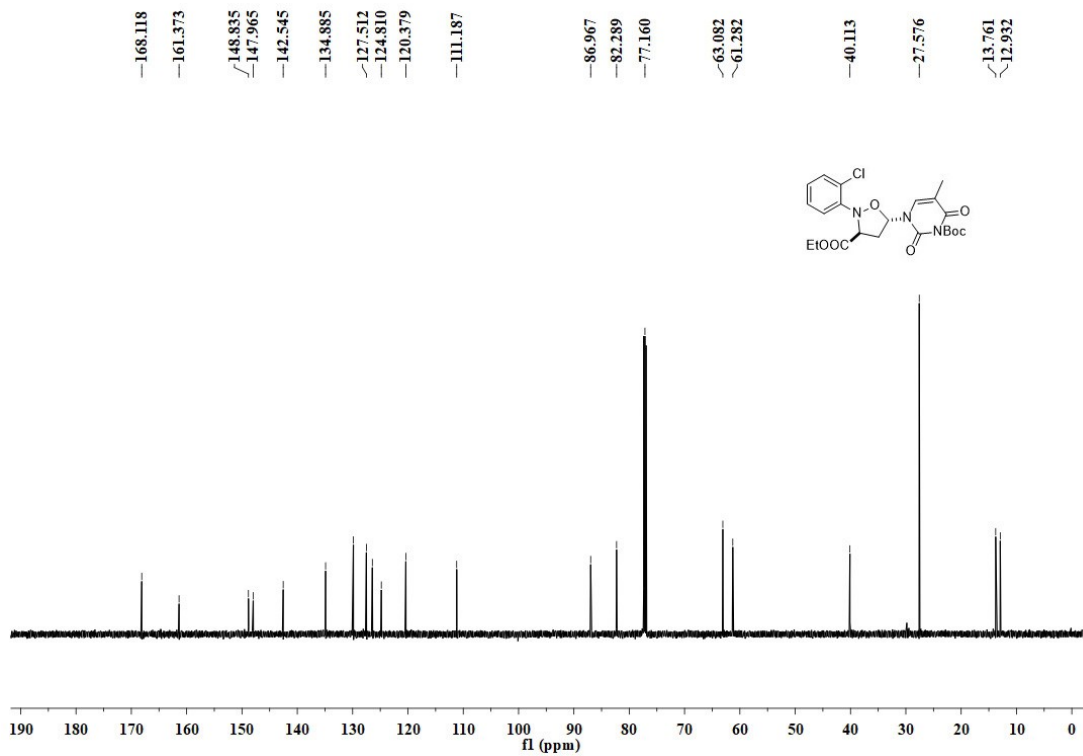

40

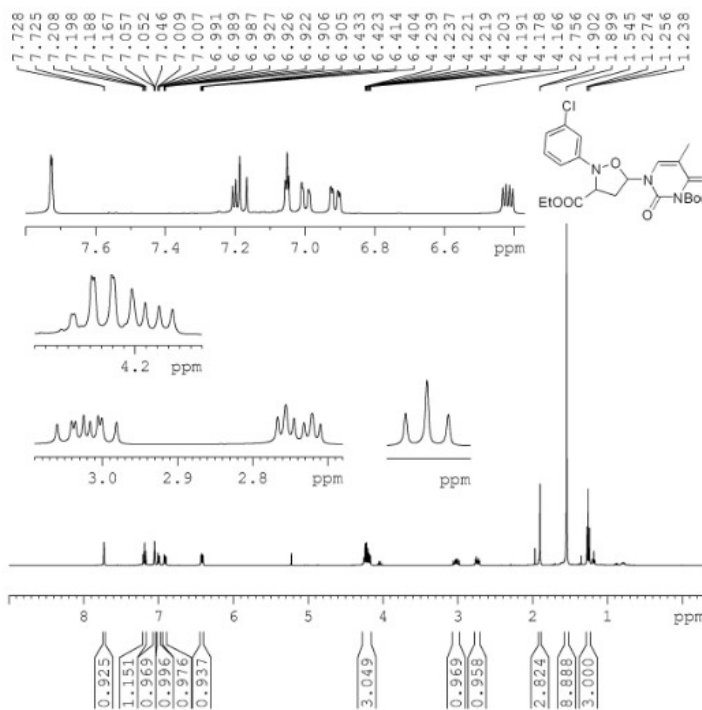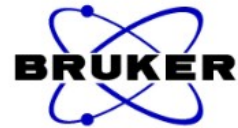

```

NAME      2016-11-09 tyut-chh
EXPNO     10
PROCNO    1
Date_     20161109
Time      22.14
INSTRUM   spect
PROBHD    5 mm PABBO BB/
PULPROG   zg30
TD         65536
SOLVENT   CDCl3
NS         16
DS         2
SWH       8012.820 Hz
FIDRES    0.122266 Hz
AQ         4.0894966 sec
RG         34.32
DW         62.400 usec
DE         6.50 usec
TE         295.9 K
D1         1.00000000 sec
TD0        1
  
```

```

===== CHANNEL f1 =====
SF01     400.1324710 MHz
NUC1      1H
P1         9.70 usec
SI         65536
SF         400.1300343 MHz
WDW        EM
SSB         0
LB         0.30 Hz
GB         0
PC         1.00
  
```

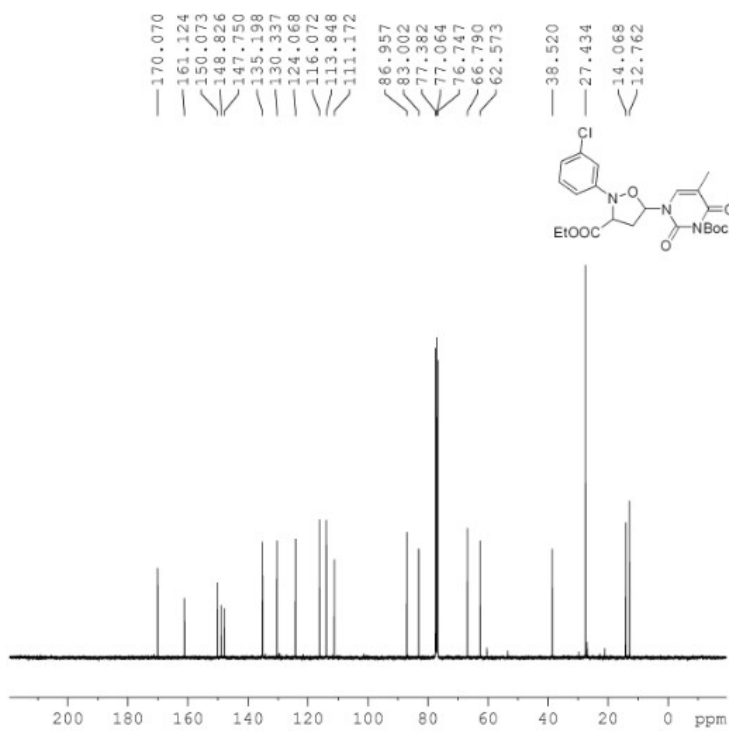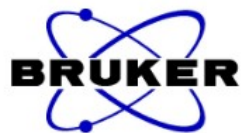

NAME 2016-11-09 tyut-chh  
 EXPNO 11  
 PROCNO 1  
 Date\_ 20161109  
 Time 23.13  
 INSTRUM spect  
 PROBHD 5 mm PABBO BB/  
 PULPROG zgpg30  
 TD 65536  
 SOLVENT CDCl3  
 NS 1024  
 DS 4  
 SWH 24038.461 Hz  
 FIDRES 0.366798 Hz  
 AQ 1.3631988 sec  
 RG 185.43  
 DW 20.800 usec  
 DE 6.50 usec  
 TE 296.6 K  
 D1 2.00000000 sec  
 D11 0.03000000 sec  
 TD0 1

===== CHANNEL f1 =====  
 SFO1 100.6228293 MHz  
 NUC1 13C  
 P1 9.50 usec  
 SI 32768  
 SF 100.6127690 MHz  
 WDW EM  
 SSB 0  
 LB 1.00 Hz  
 GB 0  
 PC 1.40

4p

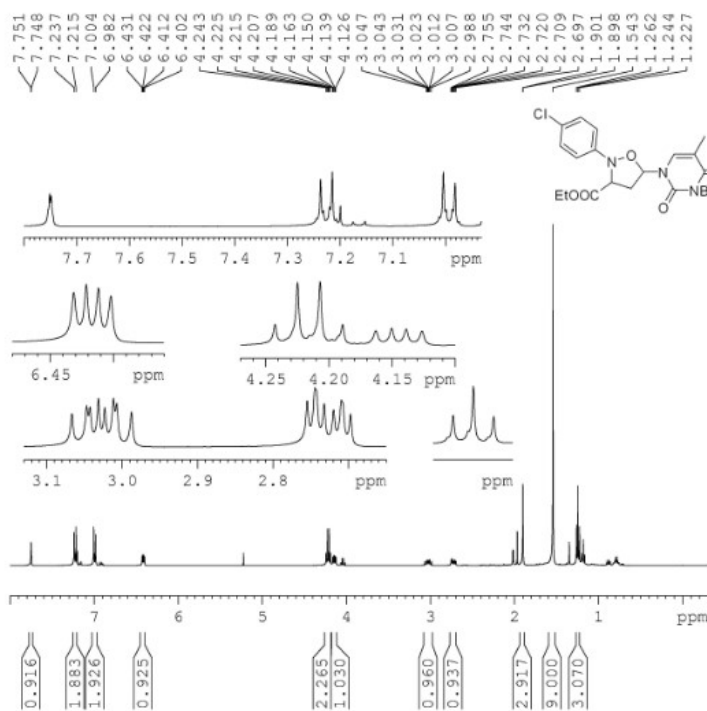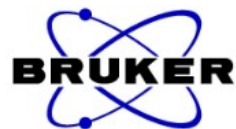

NAME 2016-11-09 tyut-chh  
 EXPNO 10  
 PROCNO 1  
 Date\_ 20161109  
 Time 23.18  
 INSTRUM spect  
 PROBHD 5 mm PABBO BB/  
 PULPROG zg30  
 TD 65536  
 SOLVENT CDCl3  
 NS 16  
 DS 2  
 SWH 8012.820 Hz  
 FIDRES 0.122266 Hz  
 AQ 4.0894966 sec  
 RG 34.32  
 DW 62.400 usec  
 DE 6.50 usec  
 TE 295.9 K  
 D1 1.00000000 sec  
 TD0 1

===== CHANNEL f1 =====  
 SFO1 400.1324710 MHz  
 NUC1 1H  
 P1 9.70 usec  
 SI 65536  
 SF 400.1300338 MHz  
 WDW EM  
 SSB 0  
 LB 0.30 Hz  
 GB 0  
 PC 1.00



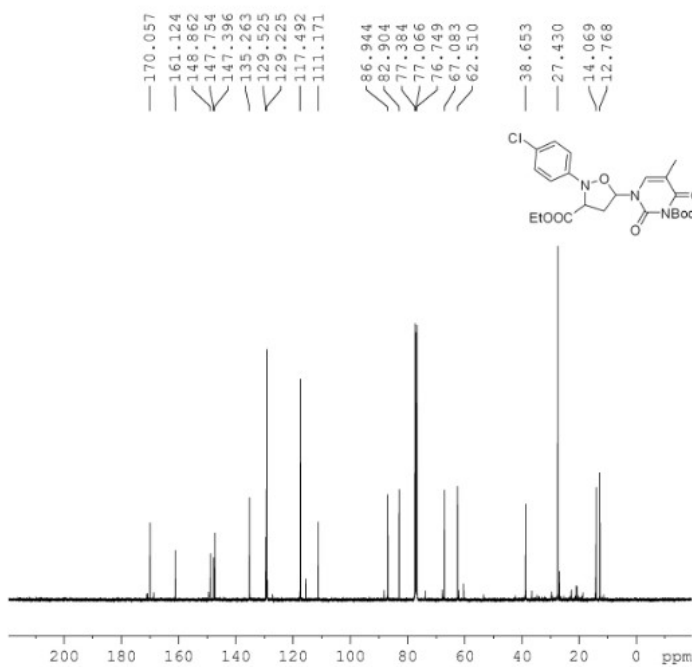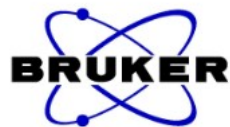

```

NAME      2016-11-09 tyut-chh
EXPNO     11
PROCNO    1
Date_     20161110
Time      0.17
INSTRUM   spect
PROBHD    5 mm PABBO BB/
PULPROG   zgpg30
TD         65536
SOLVENT   CDCl3
NS         1024
DS         4
SWH        24038.461 Hz
FIDRES     0.366798 Hz
AQ         1.3631988 sec
RG         185.43
DW         20.800 usec
DE         6.50 usec
TE         296.5 K
D1         2.00000000 sec
D11        0.03000000 sec
TD0        1
  
```

```

===== CHANNEL f1 =====
SFO1      100.6228293 MHz
NUC1       13C
P1         9.50 usec
SI         32768
SF         100.6127690 MHz
WDW        EM
SSB         0
LB         1.00 Hz
GB         0
PC         1.40
  
```

### 4q

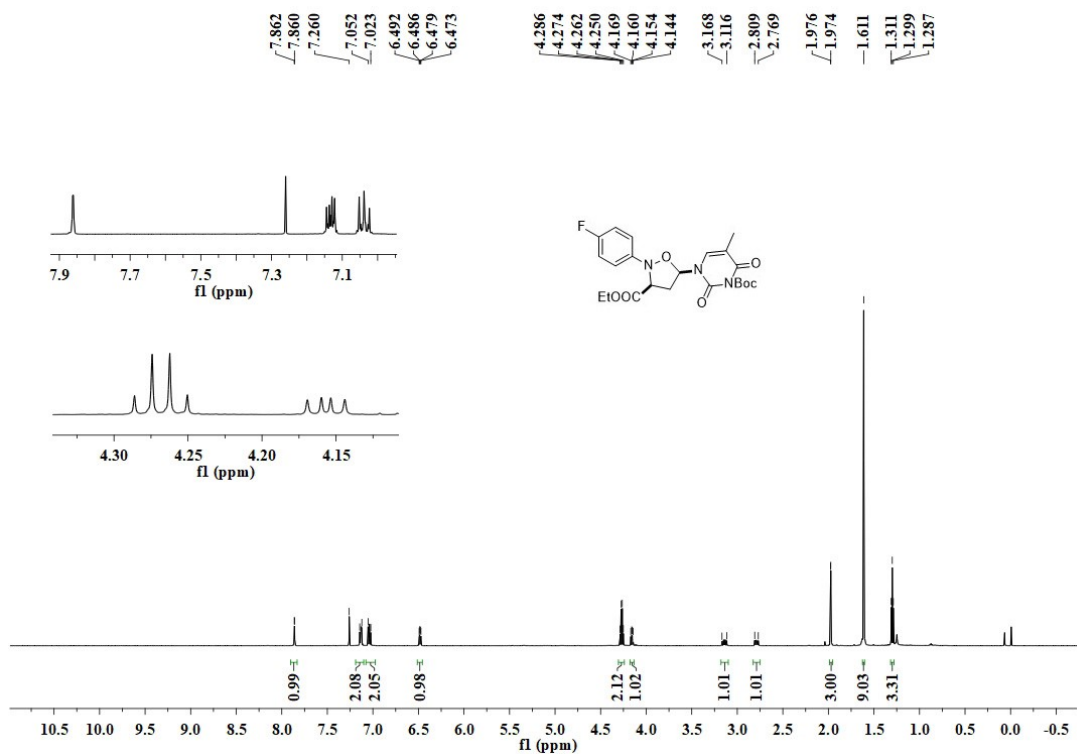

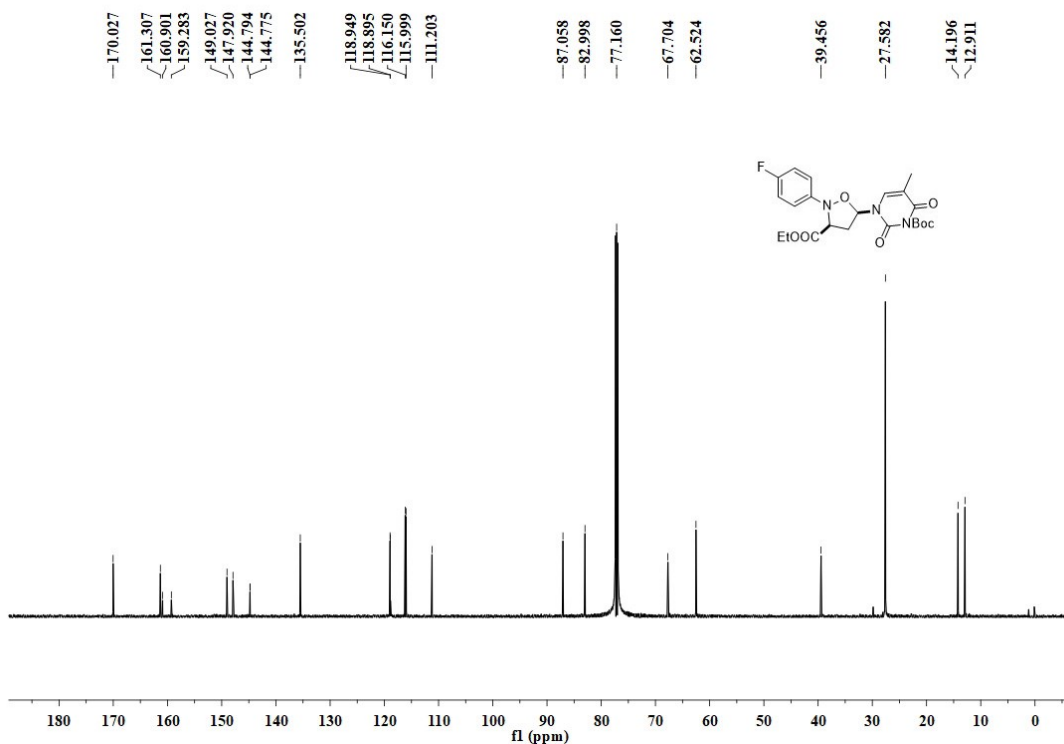

4r

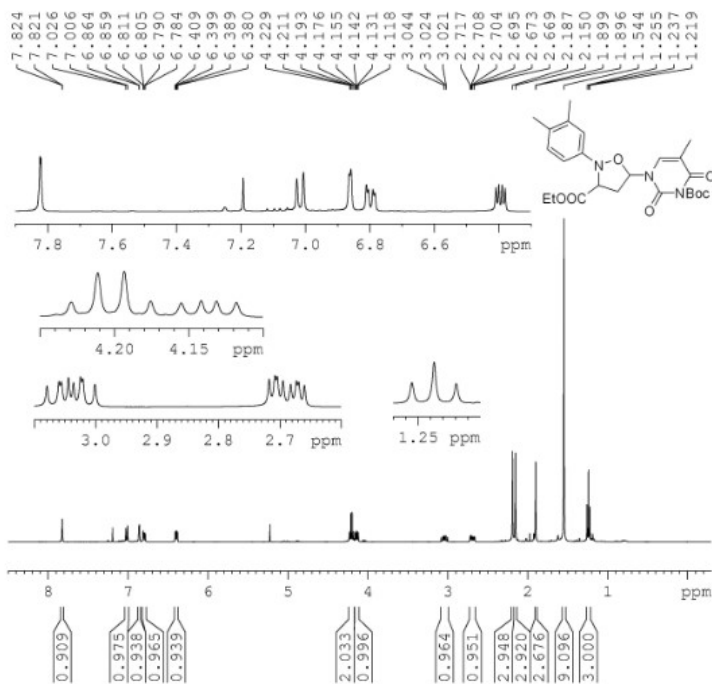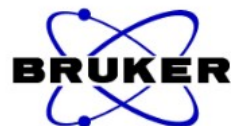

NAME 2016-11-29 tyut-chh  
 EXPNO 10  
 PROCNO 1  
 Date\_ 20161130  
 Time 2.03  
 INSTRUM spect  
 PROBHD 5 mm PABBO BB/  
 PULPROG zg30  
 TD 65536  
 SOLVENT CDC13  
 NS 16  
 DS 2  
 SWH 8012.820 Hz  
 FIDRES 0.122266 Hz  
 AQ 4.0894966 sec  
 RG 34.32  
 DW 62.400 usec  
 DE 6.50 usec  
 TE 292.3 K  
 D1 1.0000000 sec  
 TD0 1

===== CHANNEL f1 =====  
 SFO1 400.1324710 MHz  
 NUC1 1H  
 P1 9.70 usec  
 SI 65536  
 SF 400.1300367 MHz  
 WDW EM  
 SSB 0  
 LB 0.30 Hz  
 GB 0  
 PC 1.00

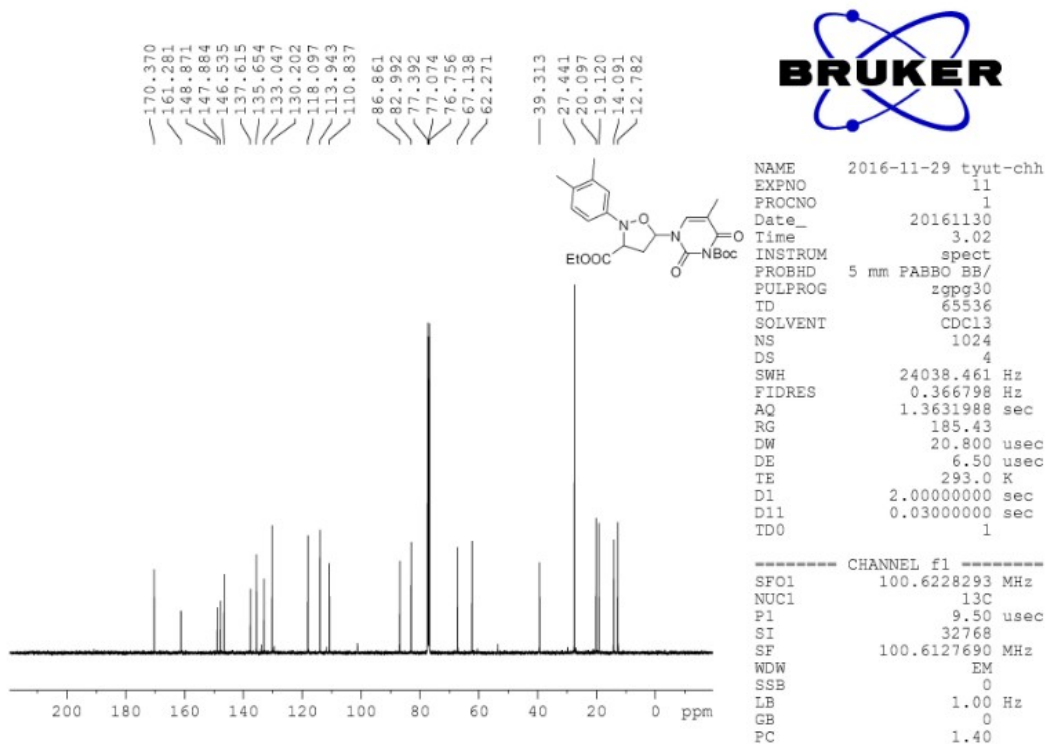

4s

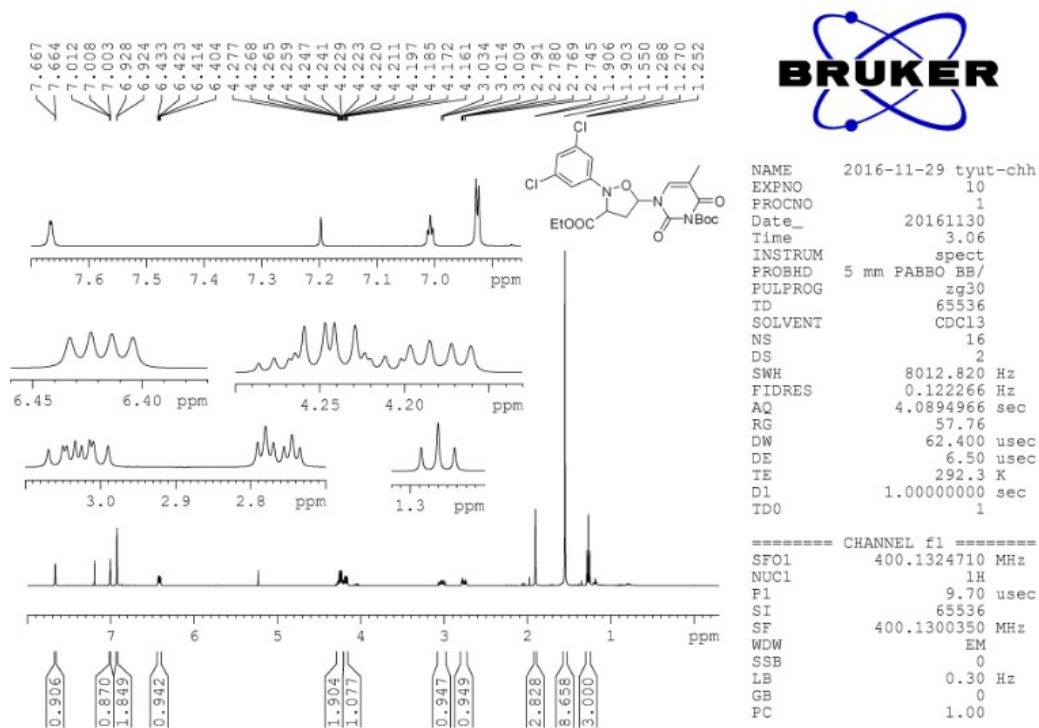

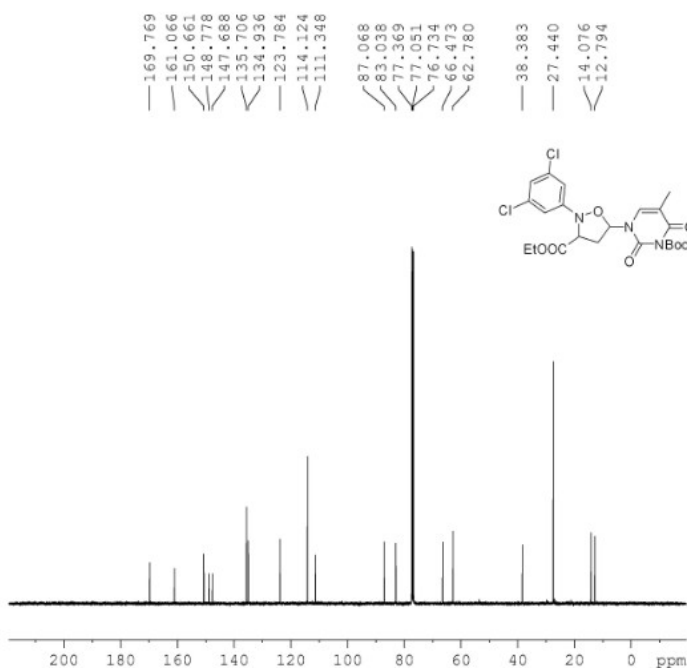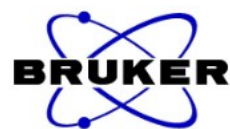

```

NAME      2016-11-29 tyut-chh
EXPNO     11
PROCNO    1
Date_     20161130
Time      4.05
INSTRUM   spect
PROBHD    5 mm PABBO BB/
PULPROG   zgpg30
TD        65536
SOLVENT   CDC13
NS        1024
DS        4
SWH       24038.461 Hz
FIDRES    0.366798 Hz
AQ        1.3631988 sec
RG        185.43
DW        20.800 usec
DE        6.50 usec
TE        293.0 K
D1        2.00000000 sec
D11       0.03000000 sec
TD0       1

===== CHANNEL f1 =====
SFO1     100.6228293 MHz
NUC1     13C
P1       9.50 usec
SI       32768
SF       100.6127690 MHz
WDW      EM
SSB      0
LB       1.00 Hz
GB       0
PC       1.40

```

4t

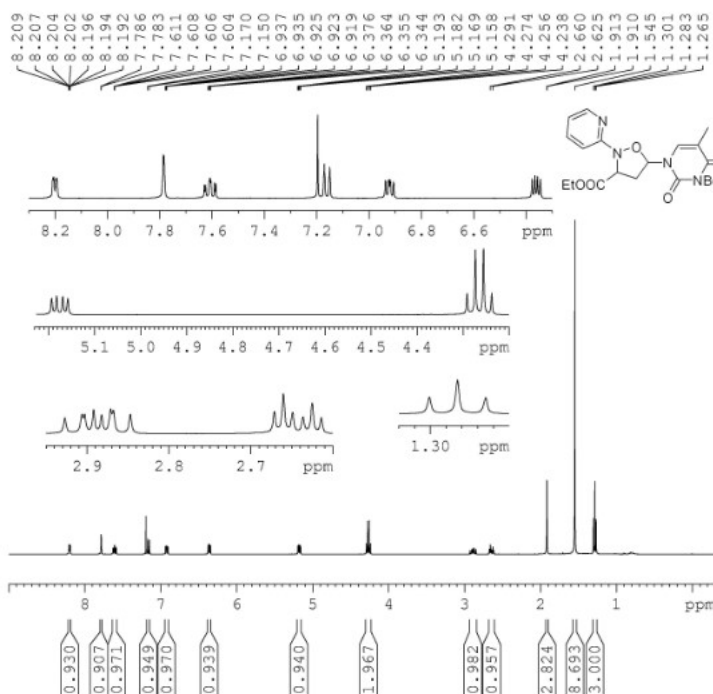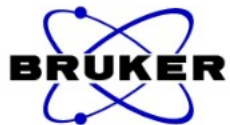

```

NAME      2016-11-10 tyut-chh
EXPNO     10
PROCNO    1
Date_     20161111
Time      0.40
INSTRUM   spect
PROBHD    5 mm PABBO BB/
PULPROG   zg30
TD        65536
SOLVENT   CDC13
NS        16
DS        2
SWH       8012.820 Hz
FIDRES    0.122266 Hz
AQ        4.0894966 sec
RG        67.58
DW        62.400 usec
DE        6.50 usec
TE        295.6 K
D1        1.00000000 sec
TD0       1

===== CHANNEL f1 =====
SFO1     400.1324710 MHz
NUC1     1H
P1       9.70 usec
SI       65536
SF       400.1300354 MHz
WDW      EM
SSB      0
LB       0.30 Hz
GB       0
PC       1.00

```

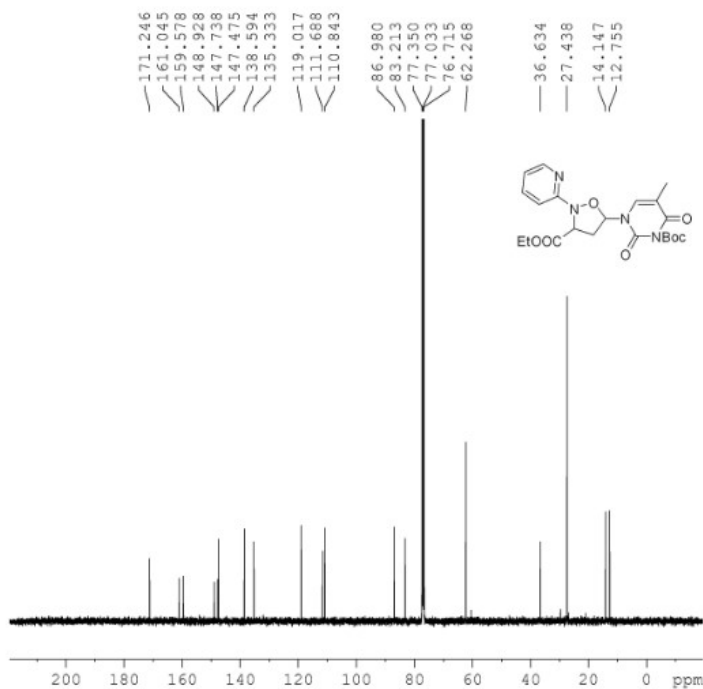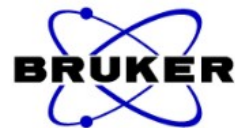

NAME 2016-11-10 tyut-chh  
 EXPNO 11  
 PROCNO 1  
 Date\_ 20161111  
 Time 1.39  
 INSTRUM spect  
 PROBHD 5 mm PABBO BB/  
 PULPROG zgpg30  
 TD 65536  
 SOLVENT CDCl3  
 NS 1024  
 DS 4  
 SWH 24038.461 Hz  
 FIDRES 0.366798 Hz  
 AQ 1.3631988 sec  
 RG 185.43  
 DW 20.800 usec  
 DE 6.50 usec  
 TE 296.2 K  
 D1 2.00000000 sec  
 D11 0.03000000 sec  
 TD0 1

===== CHANNEL f1 =====  
 SFO1 100.6228293 MHz  
 NUC1 13C  
 P1 9.50 usec  
 SI 32768  
 SF 100.6127690 MHz  
 WDW EM  
 SSB 0  
 LB 1.00 Hz  
 GB 0  
 PC 1.40

4u

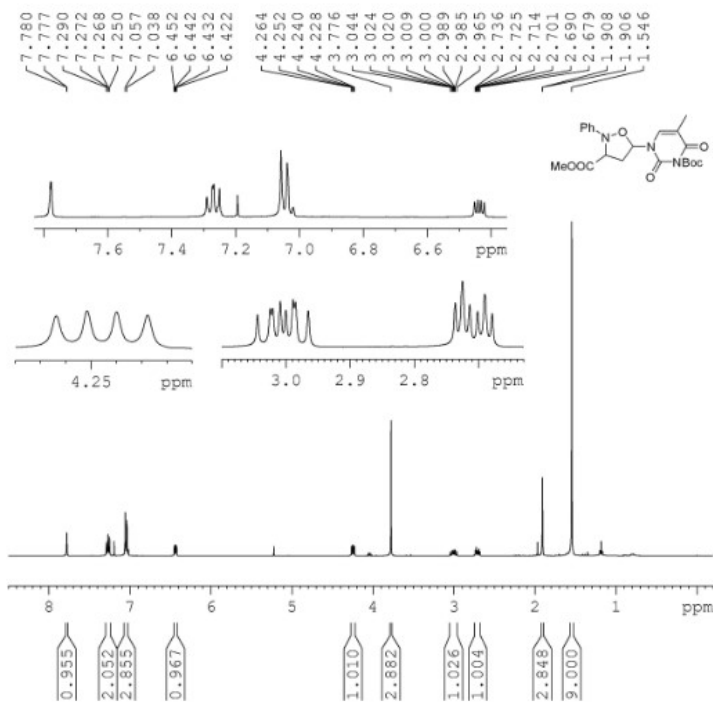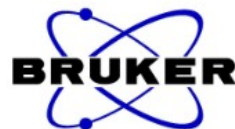

NAME 2016-11-08 tyut-chh  
 EXPNO 10  
 PROCNO 1  
 Date\_ 20161109  
 Time 10.26  
 INSTRUM spect  
 PROBHD 5 mm PABBO BB/  
 PULPROG zg30  
 TD 65536  
 SOLVENT CDCl3  
 NS 16  
 DS 2  
 SWH 8012.820 Hz  
 FIDRES 0.122266 Hz  
 AQ 4.0894966 sec  
 RG 34.32  
 DW 62.400 usec  
 DE 6.50 usec  
 TE 295.4 K  
 D1 1.00000000 sec  
 TD0 1

===== CHANNEL f1 =====  
 SFO1 400.1324710 MHz  
 NUC1 1H  
 P1 9.70 usec  
 SI 65536  
 SF 400.1300361 MHz  
 WDW EM  
 SSB 0  
 LB 0.30 Hz  
 GB 0  
 PC 1.00

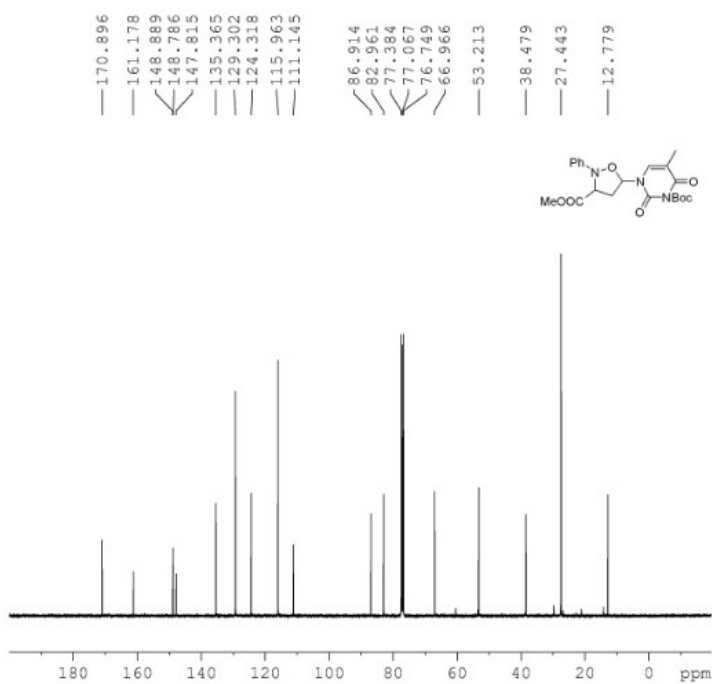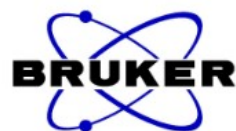

```

NAME      2016-11-08 tyut-chn
EXPNO     11
PROCNO    1
Date_     20161109
Time      11.25
INSTRUM   spect
PROBHD    5 mm PABBO BB/
PULPROG   zgpg30
ID        65536
SOLVENT   CDCl3
NS        1024
DS        4
SWH       24038.461 Hz
FIDRES    0.366798 Hz
AQ        1.3631988 sec
RG        185.43
DW        20.800 usec
DE        6.50 usec
TE        296.3 K
D1        2.00000000 sec
D11       0.03000000 sec
TD0       1
  
```

```

===== CHANNEL f1 =====
SFO1     100.6228293 MHz
NUC1     13C
P1       9.50 usec
SI       32768
SF       100.6127690 MHz
WDW      EM
SSB      0
LB       1.00 Hz
GB       0
PC       1.40
  
```

4v

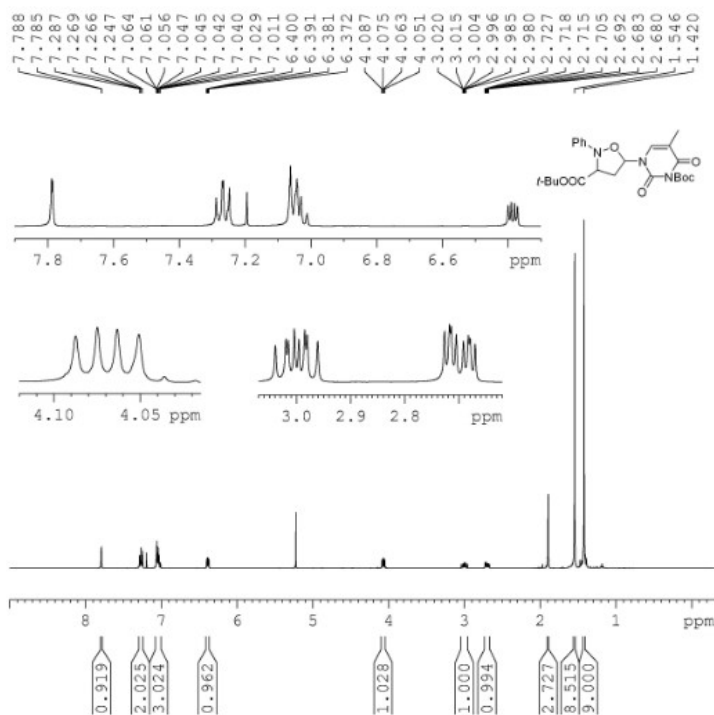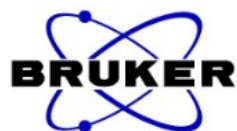

```

NAME      2016-11-08 tyut-chn
EXPNO     10
PROCNO    1
Date_     20161109
Time      11.29
INSTRUM   spect
PROBHD    5 mm PABBO BB/
PULPROG   zg30
ID        65536
SOLVENT   CDCl3
NS        16
DS        2
SWH       8012.820 Hz
FIDRES    0.122266 Hz
AQ        4.0894966 sec
RG        34.32
DW        62.400 usec
DE        6.50 usec
TE        295.6 K
D1        1.00000000 sec
TD0       1
  
```

```

===== CHANNEL f1 =====
SFO1     400.1324710 MHz
NUC1     1H
P1       9.70 usec
SI       65536
SF       400.1300361 MHz
WDW      EM
SSB      0
LB       0.30 Hz
GB       0
PC       1.00
  
```

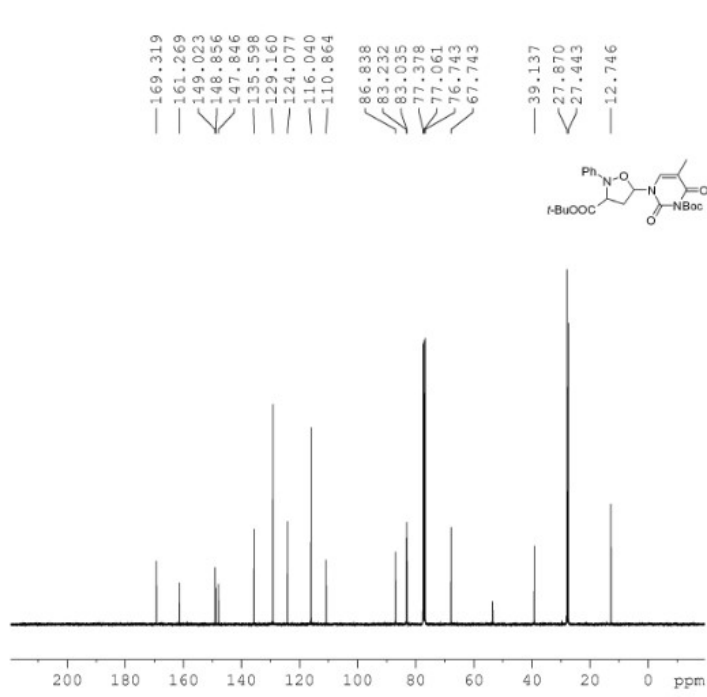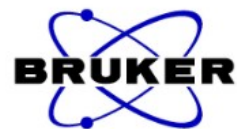

```

NAME      2016-11-08 tyut-chh
EXPNO    11
PROCNO   1
Date_    20161109
Time     12.28
INSTRUM  spect
PROBHD   5 mm PABBO BB/
PULPROG  zgpgg30
TD       65536
SOLVENT  CDCl3
NS       1024
DS       4
SWH      24038.461 Hz
FIDRES   0.366798 Hz
AQ       1.3631988 sec
RG       185.43
DW       20.800 usec
DE       6.50 usec
TE       296.3 K
D1       2.00000000 sec
D11      0.03000000 sec
TD0      1
  
```

```

===== CHANNEL f1 =====
SFO1    100.6228293 MHz
NUC1     13C
P1       9.50 usec
SI       32768
SF       100.6127690 MHz
WDW      EM
SSB      0
LB       1.00 Hz
GB       0
PC       1.40
  
```

4w

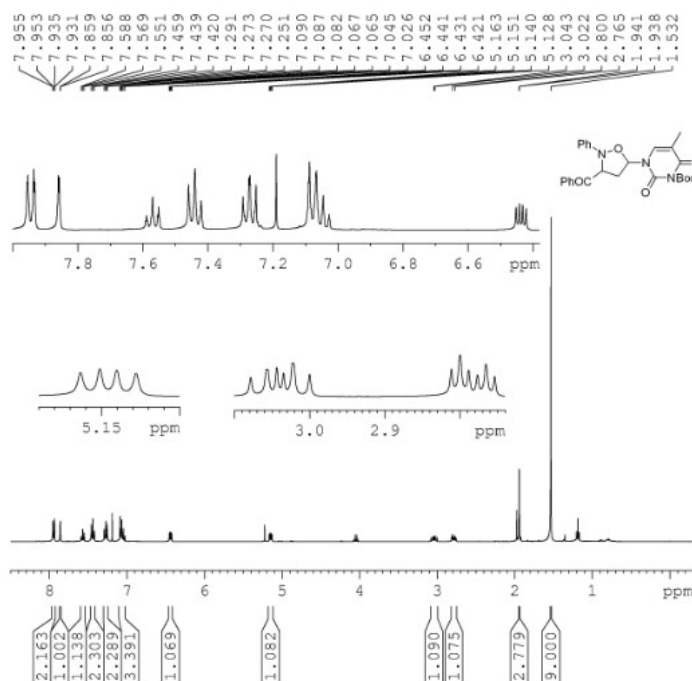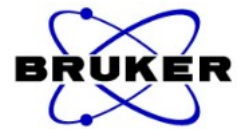

```

NAME      2016-11-08 tyut-chh
EXPNO    10
PROCNO   1
Date_    20161109
Time     12.32
INSTRUM  spect
PROBHD   5 mm PABBO BB/
PULPROG  zg30
TD       65536
SOLVENT  CDCl3
NS       16
DS       2
SWH      8012.820 Hz
FIDRES   0.122266 Hz
AQ       4.0894966 sec
RG       57.76
DW       62.400 usec
DE       6.50 usec
TE       295.7 K
D1       1.00000000 sec
TD0      1
  
```

```

===== CHANNEL f1 =====
SFO1    400.1324710 MHz
NUC1     1H
P1       9.70 usec
SI       65536
SF       400.1300381 MHz
WDW      EM
SSB      0
LB       0.30 Hz
GB       0
PC       1.00
  
```

S47

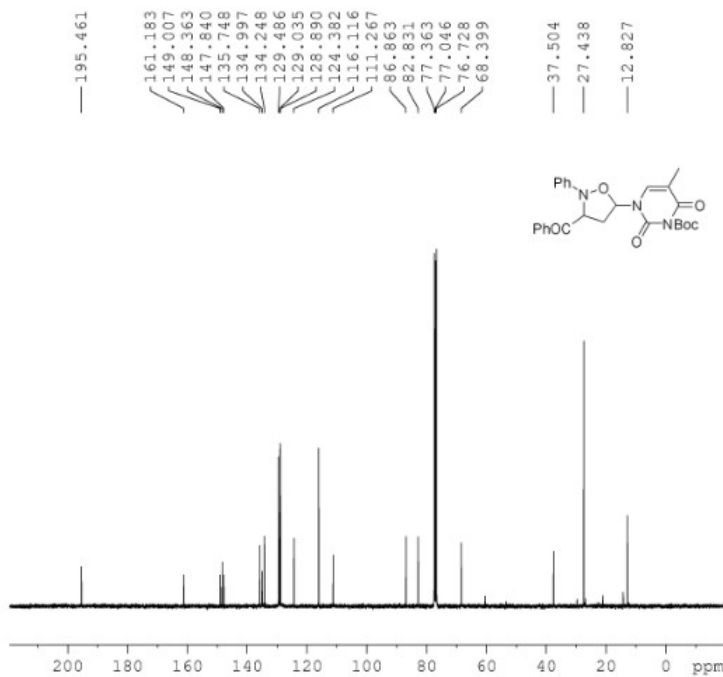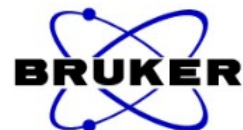

NAME 2016-11-08 tyut-chh  
 EXPNO 11  
 PROCNO 1  
 Date\_ 20161109  
 Time 13.31  
 INSTRUM spect  
 PROBHD 5 mm PABBO BB/  
 PULPROG zgpg30  
 TD 65536  
 SOLVENT CDCl3  
 NS 1024  
 DS 4  
 SWH 24038.461 Hz  
 FIDRES 0.366798 Hz  
 AQ 1.3631988 sec  
 RG 185.43  
 DW 20.800 usec  
 DE 6.50 usec  
 TE 296.4 K  
 D1 2.00000000 sec  
 D11 0.03000000 sec  
 TD0 1

===== CHANNEL f1 =====  
 SFO1 100.6228293 MHz  
 NUC1 13C  
 P1 9.50 usec  
 SI 32768  
 SF 100.6127690 MHz  
 WDW EM  
 SSB 0  
 LB 1.00 Hz  
 GB 0  
 PC 1.40

## 11. <sup>1</sup>H- and <sup>13</sup>C-NMR spectra of products 6

6a

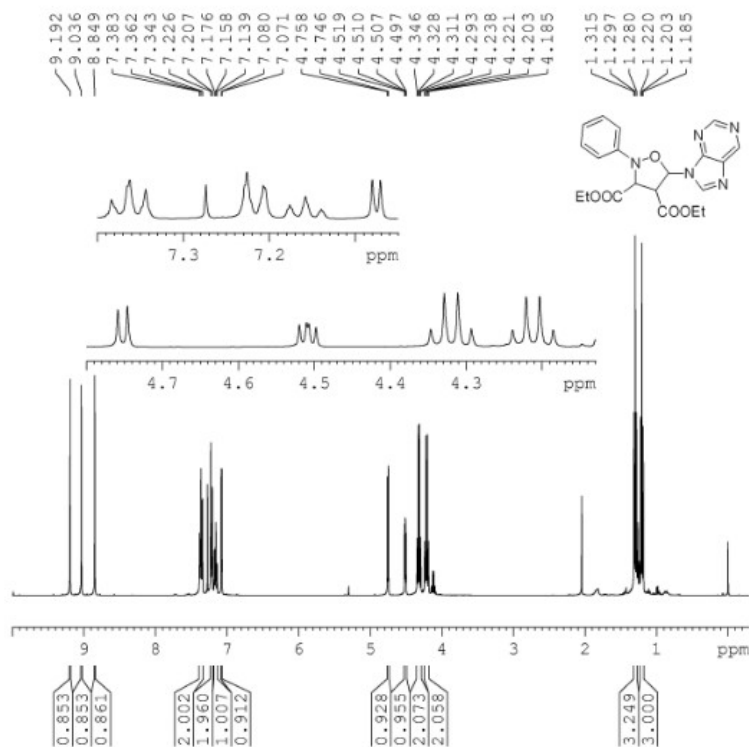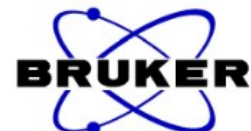

NAME 2017-03-17 tyut-lix  
 EXPNO 10  
 PROCNO 1  
 Date\_ 20170318  
 Time 18.25  
 INSTRUM spect  
 PROBHD 5 mm PABBO BB/  
 PULPROG zg30  
 TD 65536  
 SOLVENT CDCl3  
 NS 16  
 DS 2  
 SWH 8012.820 Hz  
 FIDRES 0.122266 Hz  
 AQ 4.0894966 sec  
 RG 57.76  
 DW 62.400 usec  
 DE 6.50 usec  
 TE 295.5 K  
 D1 1.00000000 sec  
 TD0 1

===== CHANNEL f1 =====  
 SFO1 400.1324710 MHz  
 NUC1 1H  
 P1 9.70 usec  
 SI 65536  
 SF 400.1300046 MHz  
 WDW EM  
 SSB 0  
 LB 0.30 Hz  
 GB 0  
 PC 1.00



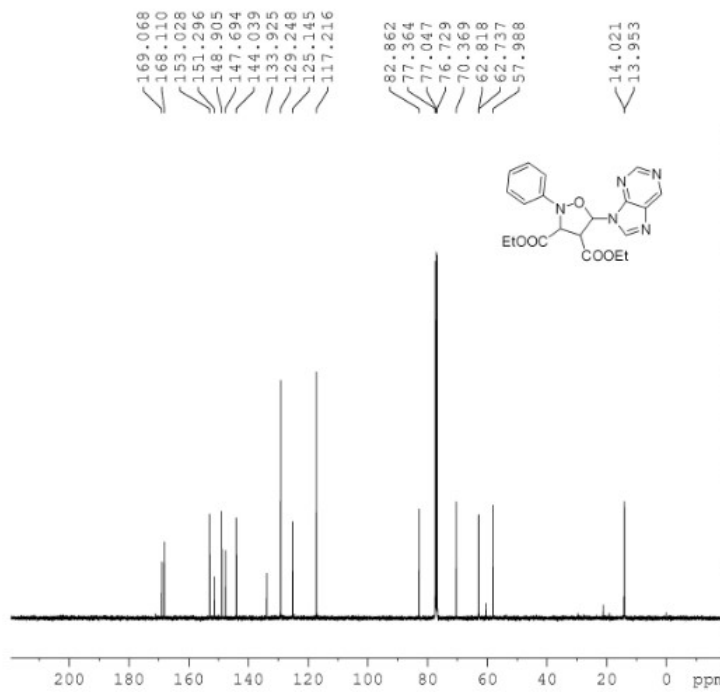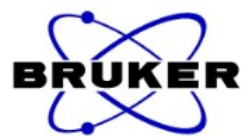

```

NAME      2017-03-17 tyut-lix
EXPNO    11
PROCNO   1
Date_    20170319
Time     3.31
INSTRUM  spect
PROBHD   5 mm PABBO BB/
PULPROG  zgpgg30
TD       65536
SOLVENT  CDCl3
NS       1024
DS       4
SWH      24038.461 Hz
FIDRES   0.366798 Hz
AQ       1.3631988 sec
RG       185.43
DW       20.800 usec
DE       6.50 usec
TE       296.3 K
D1       2.00000000 sec
D11      0.03000000 sec
TD0      1
  
```

```

===== CHANNEL f1 =====
SFO1    100.6228293 MHz
NUC1    13C
P1      9.50 usec
SI      32768
SF      100.6127690 MHz
WDW     EM
SSB     0
LB      1.00 Hz
GB      0
PC      1.40
  
```

6b

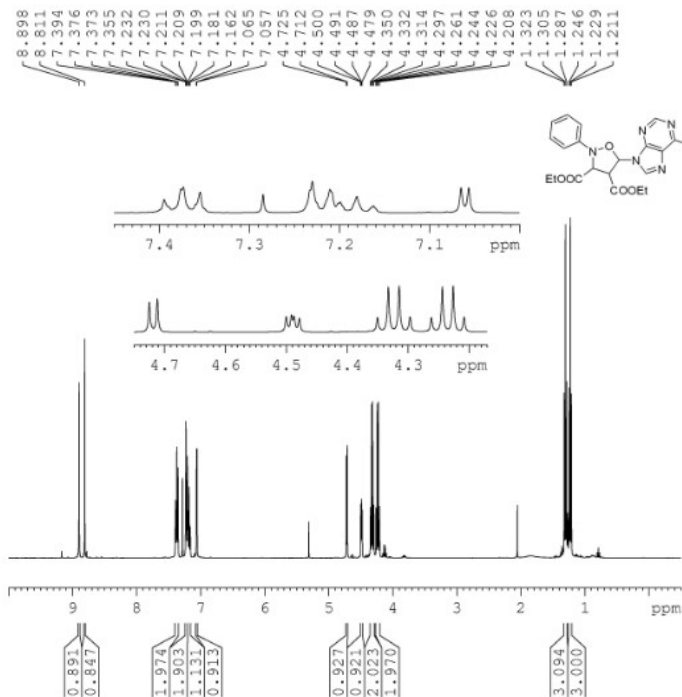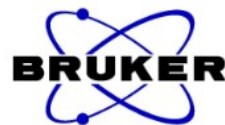

```

NAME      2016-09-22 tyuy-chh
EXPNO    10
PROCNO   1
Date_    20160922
Time     18.45
INSTRUM  spect
PROBHD   5 mm PABBO BB/
PULPROG  zg30
TD       65536
SOLVENT  CDCl3
NS       16
DS       2
SWH      8012.820 Hz
FIDRES   0.122266 Hz
AQ       4.0894966 sec
RG       57.76
DW       62.400 usec
DE       6.50 usec
TE       295.4 K
D1       1.00000000 sec
TD0      1
  
```

```

===== CHANNEL f1 =====
SFO1    400.1324710 MHz
NUC1    1H
P1      9.70 usec
SI      65536
SF      400.1300000 MHz
WDW     EM
SSB     0
LB      0.30 Hz
GB      0
PC      1.00
  
```

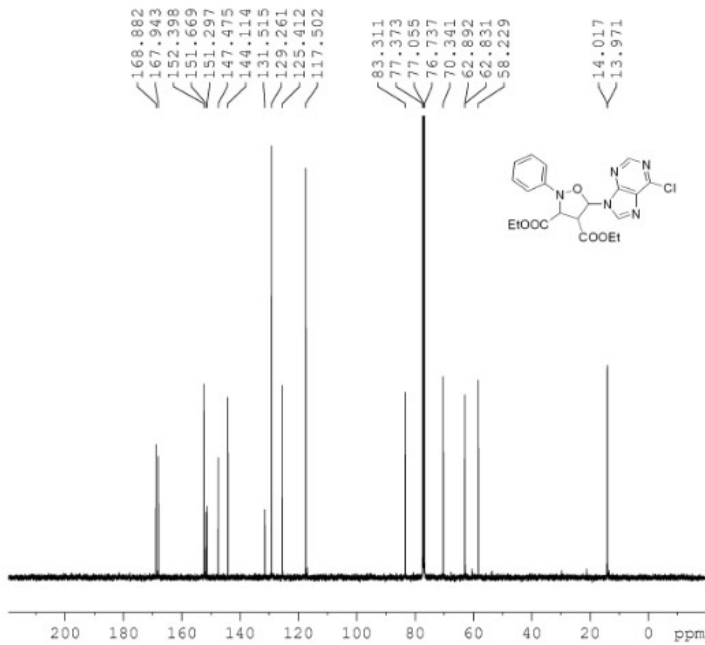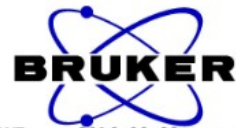

NAME 2016-09-22 tyuy-chh  
 EXPNO 11  
 PROCNO 1  
 Date\_ 20160922  
 Time 19.44  
 INSTRUM spect  
 PROBHD 5 mm PABBO BB/  
 PULPROG zgpg30  
 TD 65536  
 SOLVENT CDCl3  
 NS 1024  
 DS 4  
 SWH 24038.461 Hz  
 FIDRES 0.366798 Hz  
 AQ 1.3631988 sec  
 RG 185.43  
 DW 20.800 usec  
 DE 6.50 usec  
 TE 296.2 K  
 D1 2.00000000 sec  
 D11 0.03000000 sec  
 TDO 1

===== CHANNEL f1 =====  
 SFO1 100.6228293 MHz  
 NUC1 13C  
 P1 9.50 usec  
 SI 32768  
 SF 100.6127690 MHz  
 WDW EM  
 SSB 0  
 LB 1.00 Hz  
 GB 0  
 PC 1.40

6c

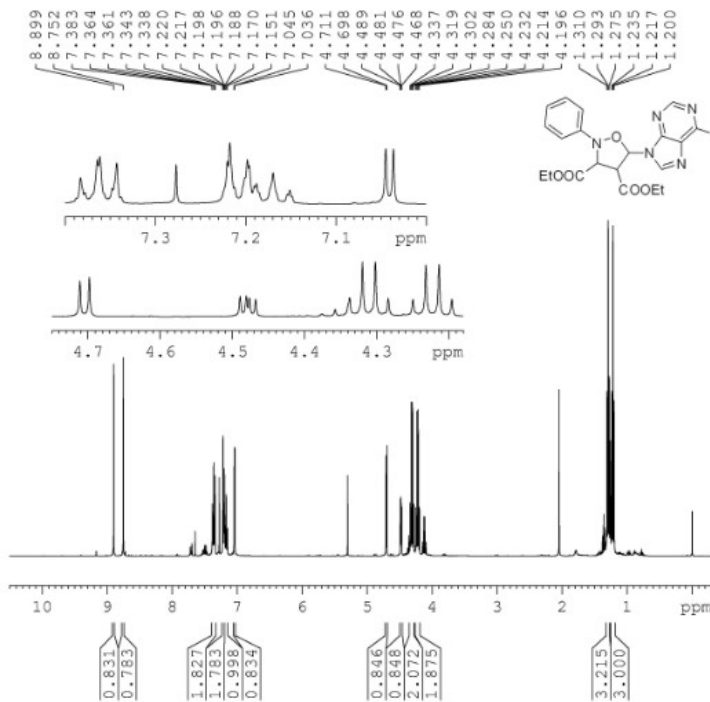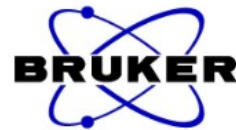

NAME 2017-03-16 tyut-lx-  
 EXPNO 10  
 PROCNO 1  
 Date\_ 20170317  
 Time 1.46  
 INSTRUM spect  
 PROBHD 5 mm PABBO BB/  
 PULPROG zg30  
 TD 65536  
 SOLVENT CDCl3  
 NS 16  
 DS 2  
 SWH 8012.820 Hz  
 FIDRES 0.122266 Hz  
 AQ 4.0894966 sec  
 RG 34.32  
 DW 62.400 usec  
 DE 6.50 usec  
 TE 295.4 K  
 D1 1.00000000 sec  
 TDO 1

===== CHANNEL f1 =====  
 SFO1 400.1324710 MHz  
 NUC1 1H  
 P1 9.70 usec  
 SI 65536  
 SF 400.1300031 MHz  
 WDW EM  
 SSB 0  
 LB 0.30 Hz  
 GB 0  
 PC 1.00

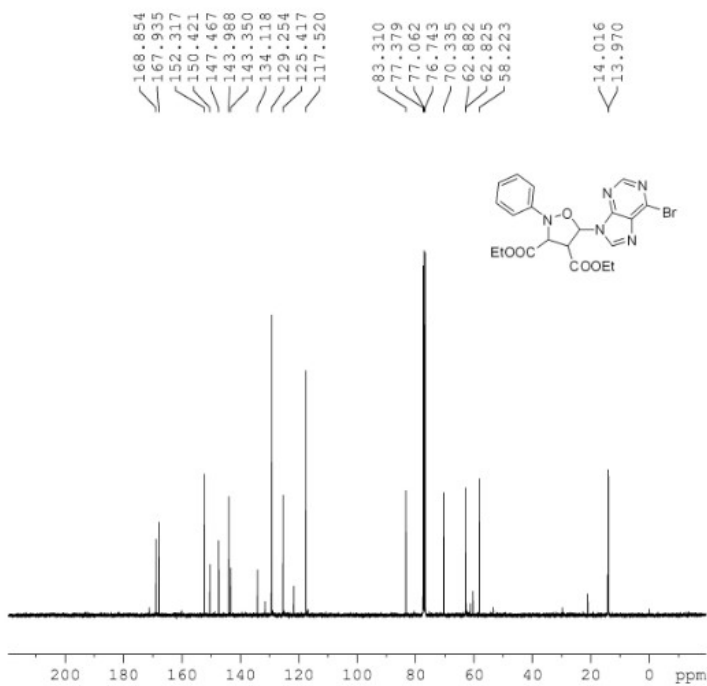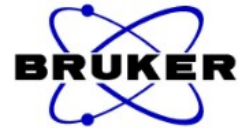

```

NAME      2017-03-16 tyut-lx-
EXPNO    11
PROCNO   1
Date_    20170317
Time     2.45
INSTRUM  spect
PROBHD   5 mm PABBO BB/
PULPROG  zgpg30
TD       65536
SOLVENT  CDCl3
NS       1024
DS       4
SWH      24038.461 Hz
FIDRES   0.366798 Hz
AQ       1.3631988 sec
RG       185.43
DW       20.800 usec
DE       6.50 usec
TE       296.4 K
D1       2.00000000 sec
D11      0.03000000 sec
TD0      1
  
```

```

===== CHANNEL f1 =====
SFO1    100.6228293 MHz
NUC1    13C
P1      9.50 usec
SI      32768
SF      100.6127690 MHz
WDW     EM
SSB     0
LB      1.00 Hz
GB      0
PC      1.40
  
```

6d

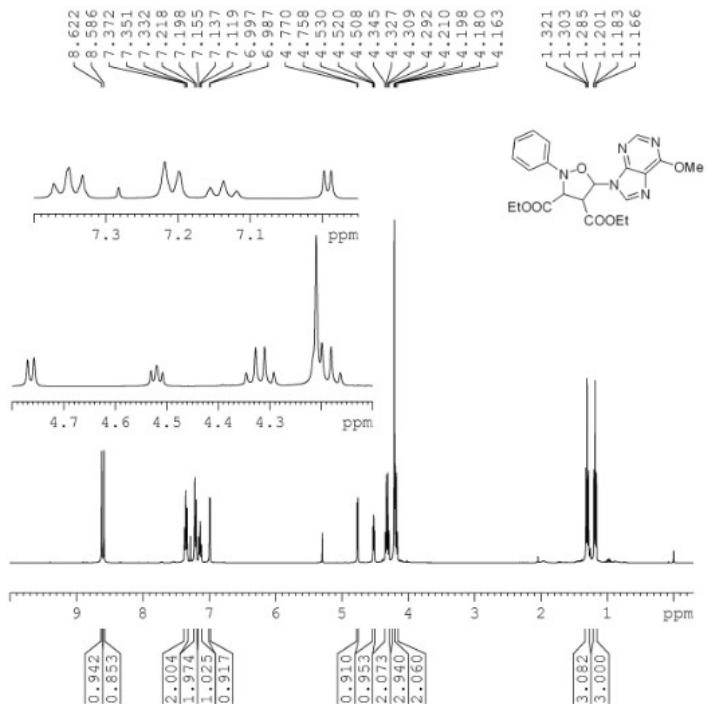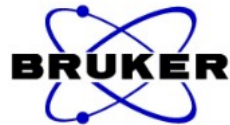

```

NAME      2017-03-17 tyut-lix
EXPNO    10
PROCNO   1
Date_    20170318
Time     18.29
INSTRUM  spect
PROBHD   5 mm PABBO BB/
PULPROG  zg30
TD       65536
SOLVENT  CDCl3
NS       16
DS       2
SWH      8012.820 Hz
FIDRES   0.122266 Hz
AQ       4.0894966 sec
RG       34.32
DW       62.400 usec
DE       6.50 usec
TE       295.5 K
D1       1.00000000 sec
TD0      1
  
```

```

===== CHANNEL f1 =====
SFO1    400.1324710 MHz
NUC1    1H
P1      9.70 usec
SI      65536
SF      400.1300010 MHz
WDW     EM
SSB     0
LB      0.30 Hz
GB      0
PC      1.00
  
```

S51

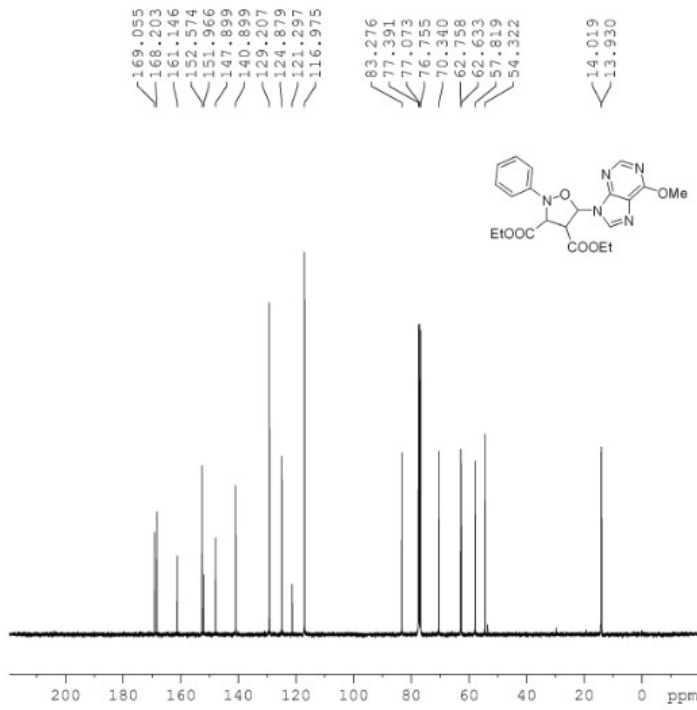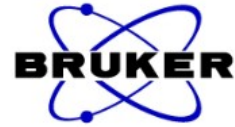

```

NAME      2017-03-17 tyut-lix
EXPNO    11
PROCNO   1
Date_    20170319
Time     4.32
INSTRUM  spect
PROBHD   5 mm PABBO BB/
PULPROG  zgpg30
TD       65536
SOLVENT  CDC13
NS       1024
DS       4
SWH      24038.461 Hz
FIDRES   0.366798 Hz
AQ       1.3631988 sec
RG       185.43
DW       20.800 usec
DE       6.50 usec
TE       296.3 K
D1       2.00000000 sec
D11      0.03000000 sec
TD0      1
  
```

```

===== CHANNEL f1 =====
SFO1     100.6228293 MHz
NUC1     13C
P1       9.50 usec
SI       32768
SF       100.6127690 MHz
WDW      EM
SSB      0
LB       1.00 Hz
GB       0
PC       1.40
  
```

6e

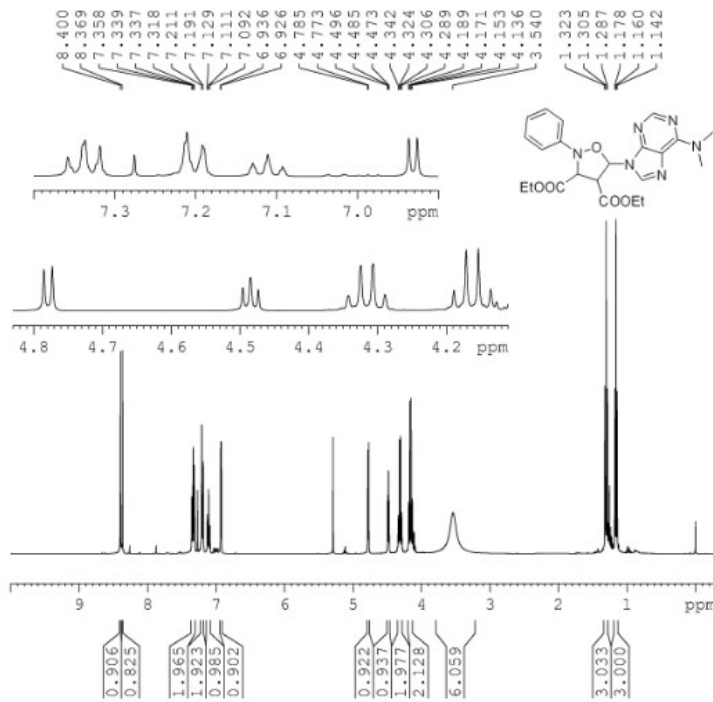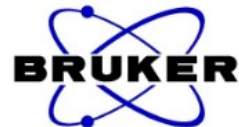

```

NAME      2017-03-16 tyut-lx-
EXPNO    10
PROCNO   1
Date_    20170317
Time     2.49
INSTRUM  spect
PROBHD   5 mm PABBO BB/
PULPROG  zg30
TD       65536
SOLVENT  CDC13
NS       16
DS       2
SWH      8012.820 Hz
FIDRES   0.122266 Hz
AQ       4.0894966 sec
RG       34.32
DW       62.400 usec
DE       6.50 usec
TE       295.7 K
D1       1.00000000 sec
TD0      1
  
```

```

===== CHANNEL f1 =====
SFO1     400.1324710 MHz
NUC1     1H
P1       9.70 usec
SI       65536
SF       400.1300036 MHz
WDW      EM
SSB      0
LB       0.30 Hz
GB       0
PC       1.00
  
```

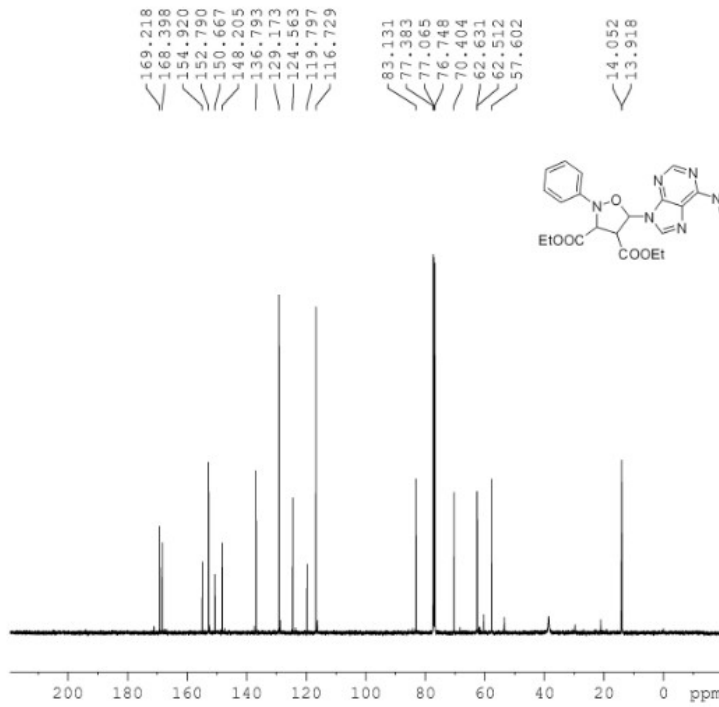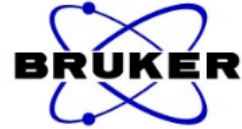

```

NAME      2017-03-16 tyut-lx-
EXPNO    11
PROCNO   1
Date_    20170317
Time     3.48
INSTRUM  spect
PROBHD   5 mm PABBO BB/
PULPROG  zgpg30
TD       65536
SOLVENT  CDCl3
NS       1024
DS       4
SWH      24038.461 Hz
FIDRES   0.366798 Hz
AQ       1.3631988 sec
RG       185.43
DW       20.800 usec
DE       6.50 usec
TE       296.4 K
D1       2.0000000 sec
D11      0.03000000 sec
TD0      1
  
```

```

===== CHANNEL f1 =====
SFO1    100.6228293 MHz
NUC1     13C
P1       9.50 usec
SI      32768
SF      100.6127690 MHz
WDW      EM
SSB      0
LB       1.00 Hz
GB       0
PC       1.40
  
```

6f

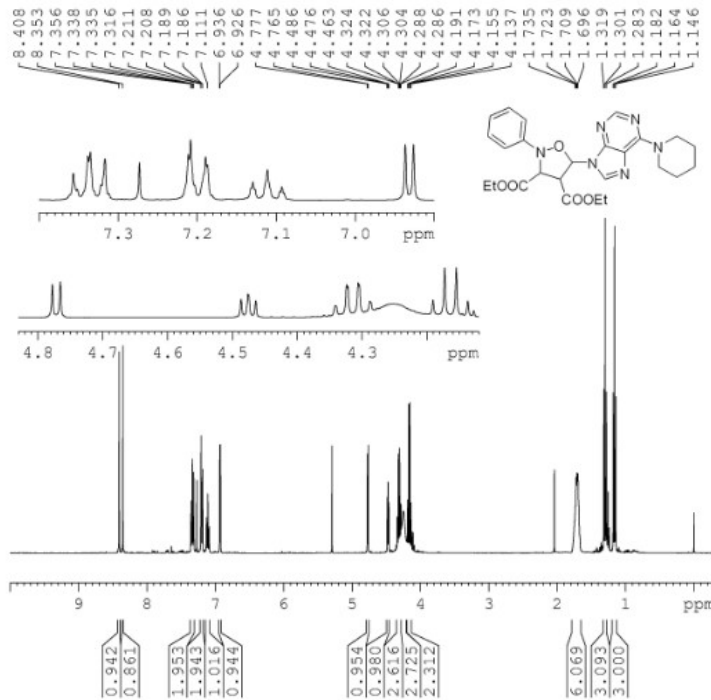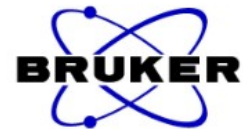

```

NAME      2017-03-16 tyut-lx-
EXPNO    10
PROCNO   1
Date_    20170317
Time     3.52
INSTRUM  spect
PROBHD   5 mm PABBO BB/
PULPROG  zg30
TD       65536
SOLVENT  CDCl3
NS       16
DS       2
SWH      8012.820 Hz
FIDRES   0.122266 Hz
AQ       4.0894966 sec
RG       34.32
DW       62.400 usec
DE       6.50 usec
TE       295.7 K
D1       1.0000000 sec
TD0      1
  
```

```

===== CHANNEL f1 =====
SFO1    400.1324710 MHz
NUC1     1H
P1       9.70 usec
SI      65536
SF      400.1300047 MHz
WDW      EM
SSB      0
LB       0.30 Hz
GB       0
PC       1.00
  
```

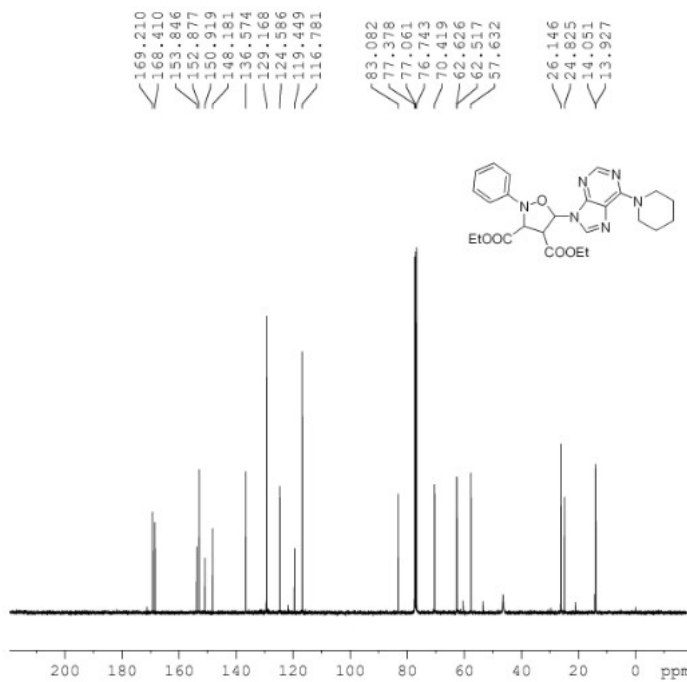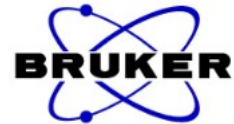

```

NAME      2017-03-16 tyut-lx-
EXPNO    11
PROCNO   1
Date_    20170317
Time     4.51
INSTRUM  spect
PROBHD   5 mm PABBO BB/
PULPROG  zgpg30
TD       65536
SOLVENT  CDCl3
NS       1024
DS       4
SWH      24038.461 Hz
FIDRES   0.366798 Hz
AQ       1.3631988 sec
RG       185.43
DW       20.800 usec
DE       6.50 usec
TE       296.3 K
D1       2.00000000 sec
D11      0.03000000 sec
TD0      1
  
```

```

===== CHANNEL f1 =====
SFO1    100.6228293 MHz
NUC1     13C
P1       9.50 usec
SI      32768
SF      100.6127690 MHz
WDW      EM
SSB      0
LB       1.00 Hz
GB       0
PC       1.40
  
```

6g

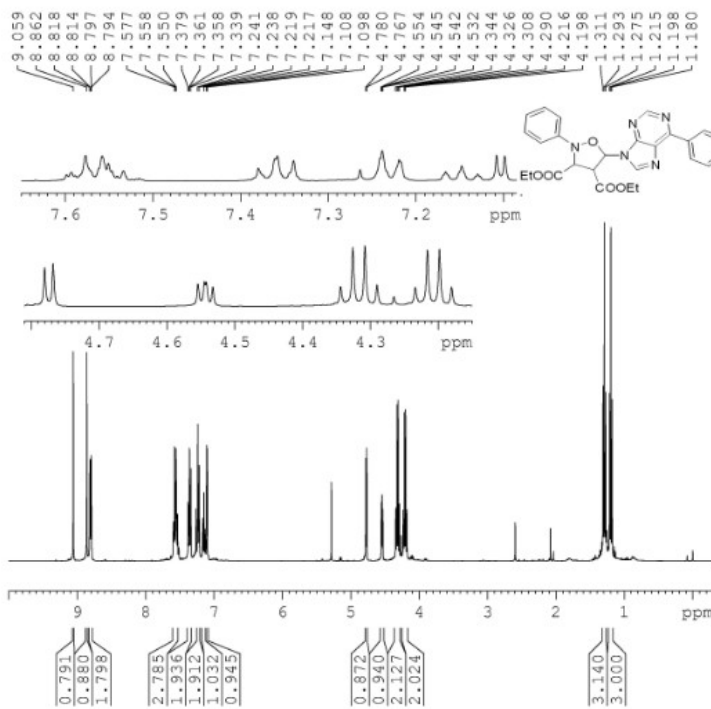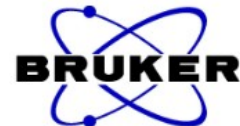

```

NAME      2017-04-28 tyut-lx-
EXPNO    10
PROCNO   1
Date_    20170428
Time     21.11
INSTRUM  spect
PROBHD   5 mm PABBO BB/
PULPROG  zg30
TD       65536
SOLVENT  CDCl3
NS       16
DS       2
SWH      8012.820 Hz
FIDRES   0.122266 Hz
AQ       4.0894966 sec
RG       34.32
DW       62.400 usec
DE       6.50 usec
TE       297.6 K
D1       1.00000000 sec
TD0      1
  
```

```

===== CHANNEL f1 =====
SFO1    400.1324710 MHz
NUC1     1H
P1       9.70 usec
SI      65536
SF      400.1300086 MHz
WDW      EM
SSB      0
LB       0.30 Hz
GB       0
PC       1.00
  
```

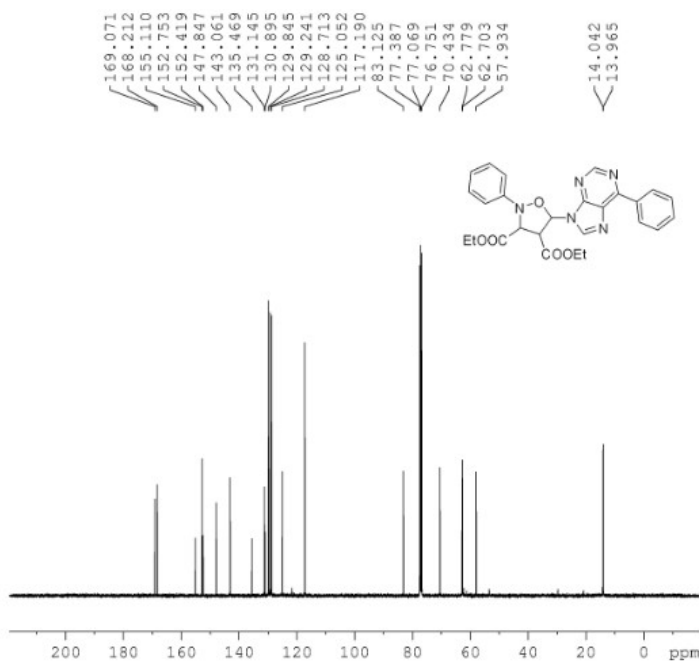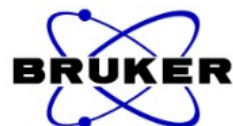

```

NAME      2017-05-02 tyut-lx-
EXPNO     10
PROCNO    1
Date_     20170502
Time      21.51
INSTRUM   spect
PROBHD    5 mm PABBO BB/
PULPROG   zgpg30
TD        65536
SOLVENT   CDCl3
NS        1024
DS        4
SWH       24038.461 Hz
FIDRES    0.366798 Hz
AQ        1.3631988 sec
RG        185.43
DW        20.800 usec
DE        6.50 usec
TE        298.0 K
D1        2.00000000 sec
D11       0.03000000 sec
TD0       1
  
```

```

===== CHANNEL f1 =====
SFO1     100.6228293 MHz
NUC1     13C
P1       9.50 usec
SI       32768
SF       100.6127690 MHz
WDW      EM
SSB      0
LB       1.00 Hz
GB       0
PC       1.40
  
```

6h

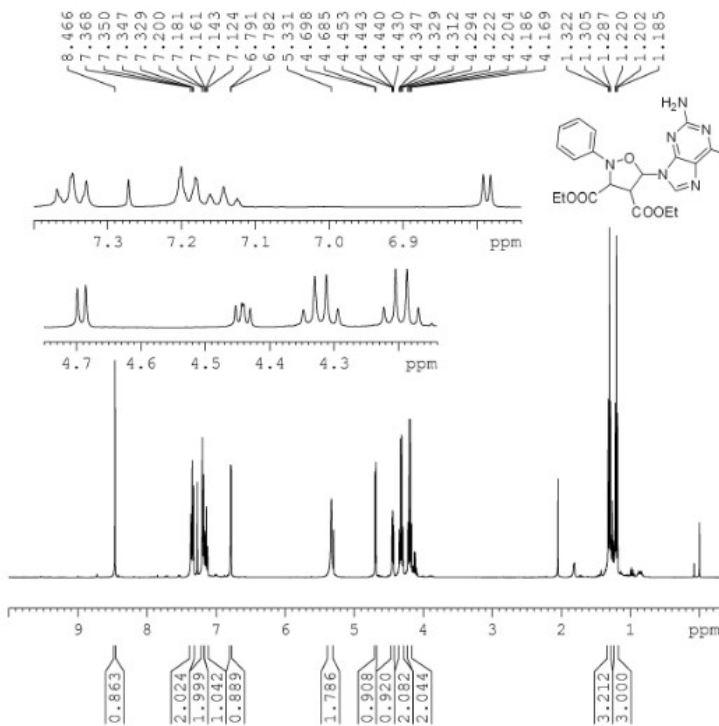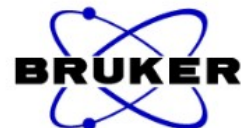

```

NAME      2017-03-17 tyut-lix
EXPNO     10
PROCNO    1
Date_     20170318
Time      18.33
INSTRUM   spect
PROBHD    5 mm PABBO BB/
PULPROG   zg30
TD        65536
SOLVENT   CDCl3
NS        16
DS        2
SWH       8012.820 Hz
FIDRES    0.122266 Hz
AQ        4.0894966 sec
RG        57.76
DW        62.400 usec
DE        6.50 usec
TE        295.5 K
D1        1.00000000 sec
TD0       1
  
```

```

===== CHANNEL f1 =====
SFO1     400.1324710 MHz
NUC1     1H
P1       9.70 usec
SI       65536
SF       400.1300053 MHz
WDW      EM
SSB      0
LB       0.30 Hz
GB       0
PC       1.00
  
```

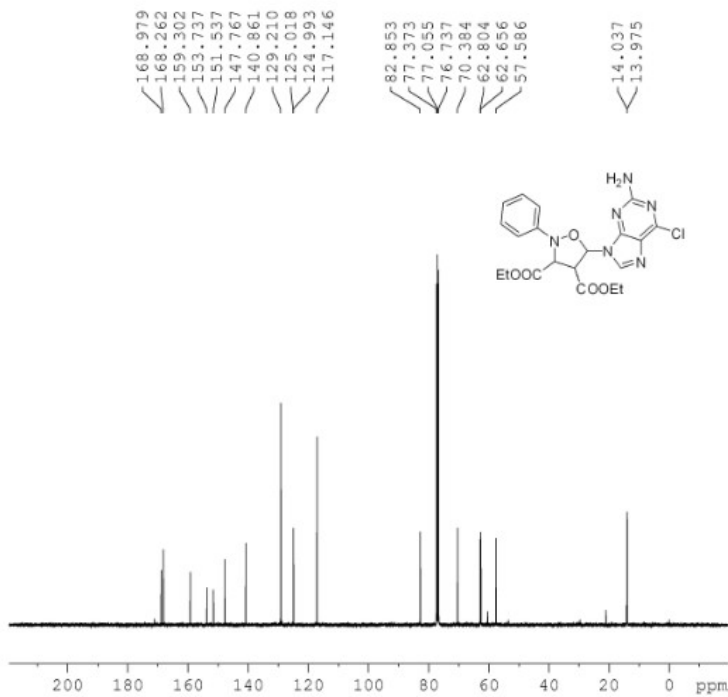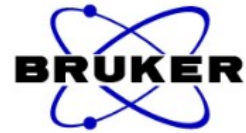

```

NAME      2017-03-17 tyut-lix
EXPNO    11
PROCNO   1
Date_    20170319
Time     5.33
INSTRUM  spect
PROBHD   5 mm PABBO BB/
PULPROG  zgpg30
TD       65536
SOLVENT  CDCl3
NS       1024
DS       4
SWH      24038.461 Hz
FIDRES   0.366798 Hz
AQ       1.3631988 sec
RG       185.43
DW       20.800 usec
DE       6.50 usec
TE       296.3 K
D1       2.00000000 sec
D11      0.03000000 sec
TD0     1
  
```

```

===== CHANNEL f1 =====
SFO1    100.6228293 MHz
NUC1     13C
P1       9.50 usec
SI      32768
SF      100.6127690 MHz
WDW     EM
SSB     0
LB      1.00 Hz
GB      0
PC      1.40
  
```

6i

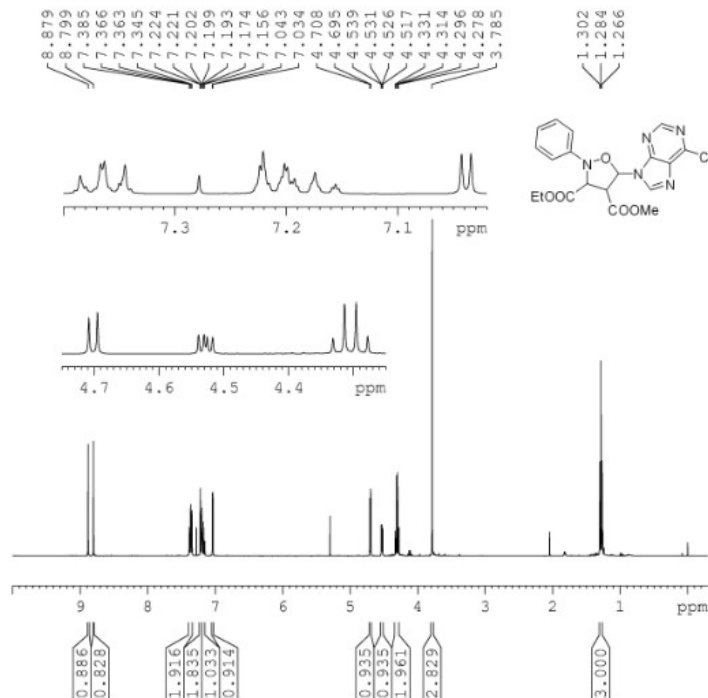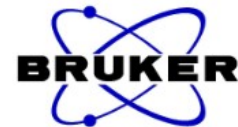

```

NAME      2017-04-15 tyut-lix
EXPNO    10
PROCNO   1
Date_    20170416
Time     2.35
INSTRUM  spect
PROBHD   5 mm PABBO BB/
PULPROG  zg30
TD       65536
SOLVENT  CDCl3
NS       16
DS       2
SWH      8012.820 Hz
FIDRES   0.122266 Hz
AQ       4.0894966 sec
RG       34.32
DW       62.400 usec
DE       6.50 usec
TE       297.4 K
D1       1.00000000 sec
TD0     1
  
```

```

===== CHANNEL f1 =====
SFO1    400.1324710 MHz
NUC1     1H
P1       9.70 usec
SI      65536
SF      400.1300024 MHz
WDW     EM
SSB     0
LB      0.30 Hz
GB      0
PC      1.00
  
```



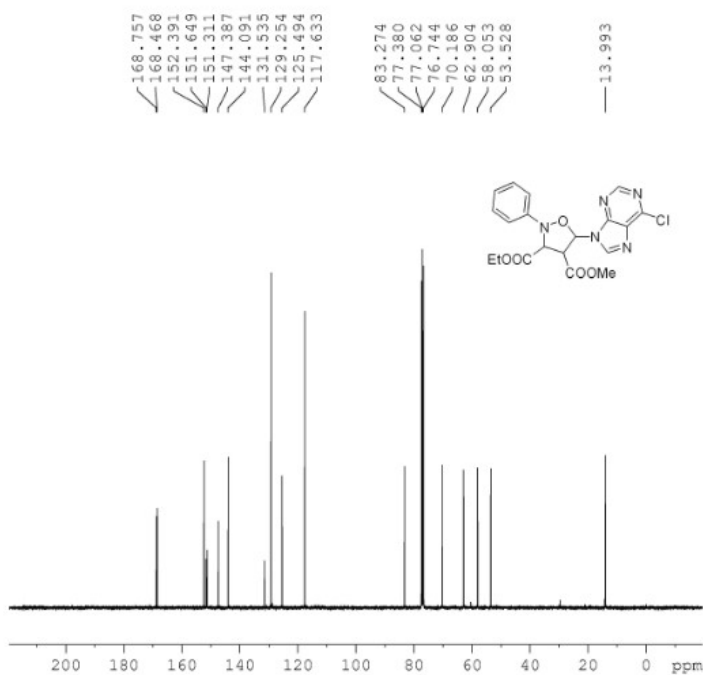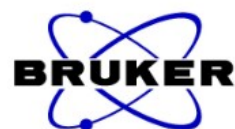

```

NAME      2017-04-15 tyut-lix
EXPNO     11
PROCNO    1
Date_     20170416
Time      3.34
INSTRUM   spect
PROBHD    5 mm PABBO BB/
PULPROG   zgpg30
TD         65536
SOLVENT   CDCl3
NS         1024
DS         4
SWH       24038.461 Hz
FIDRES    0.366798 Hz
AQ         1.3631988 sec
RG         185.43
DW         20.800 usec
DE         6.50 usec
TE         298.1 K
D1         2.00000000 sec
D11        0.03000000 sec
TDO        1

```

```

===== CHANNEL f1 =====
SFO1      100.6228293 MHz
NUC1      13C
P1        9.50 usec
SI        32768
SF        100.6127690 MHz
WDW       EM
SSB       0
LB        1.00 Hz
GB        0
PC        1.40

```

6k

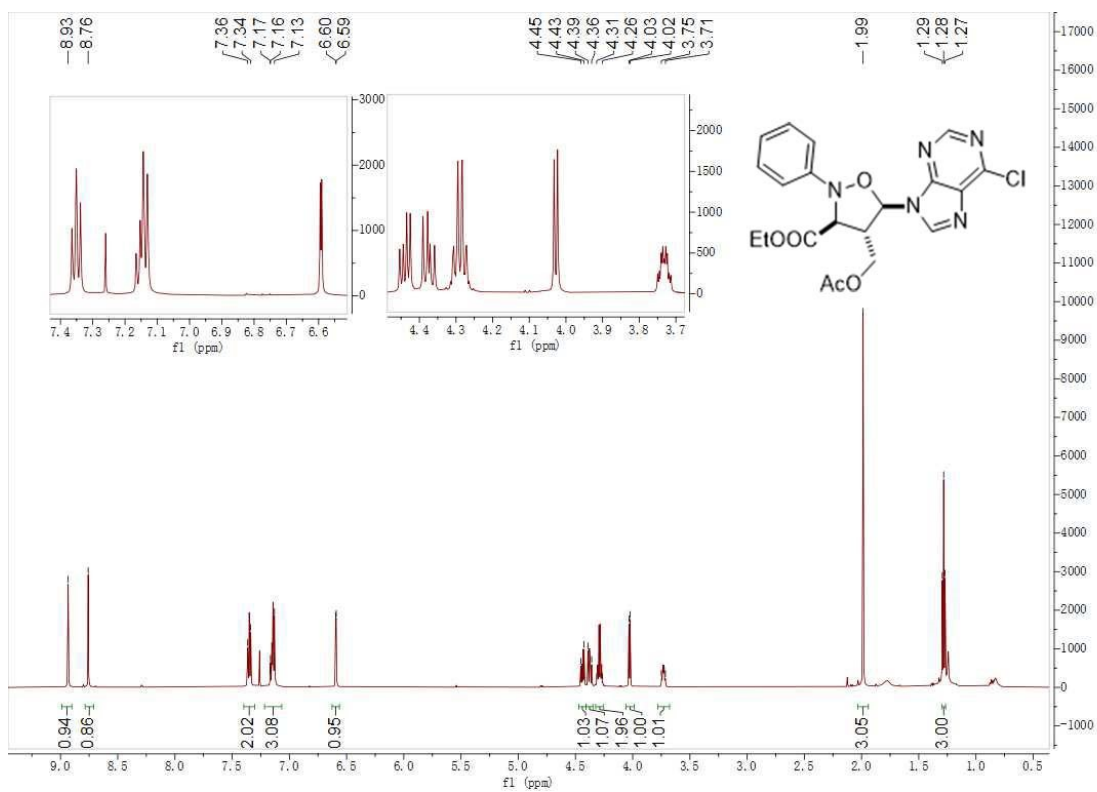

S57

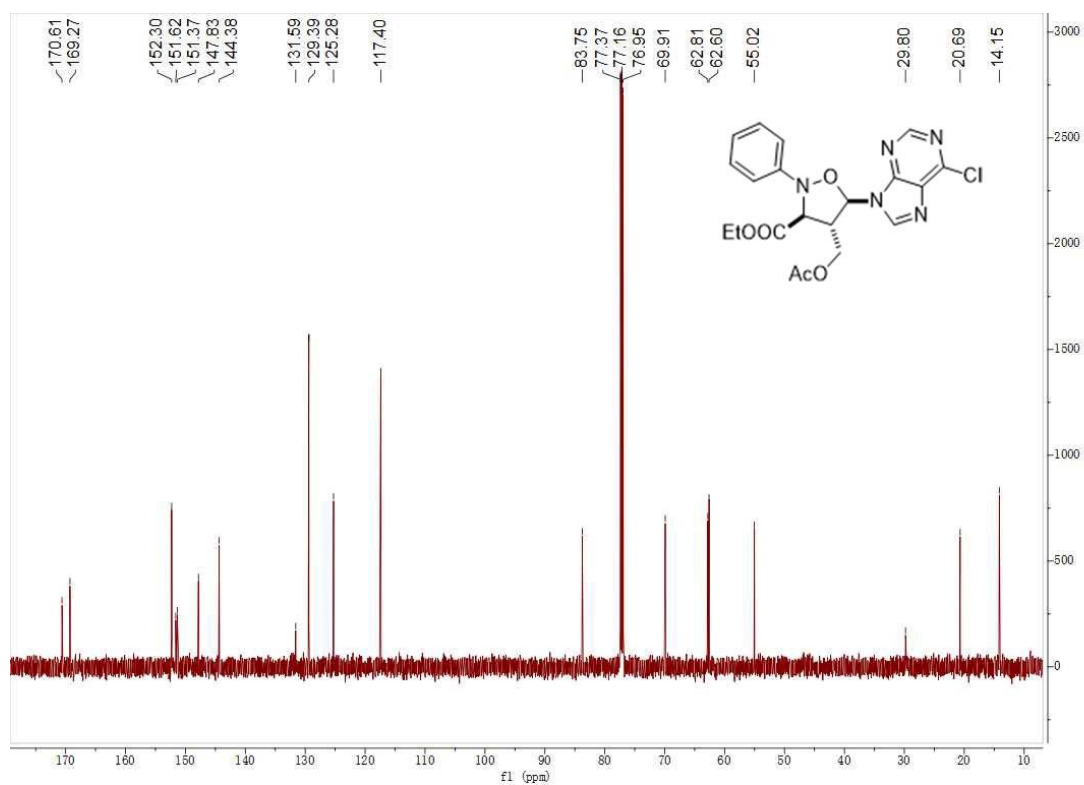

6l

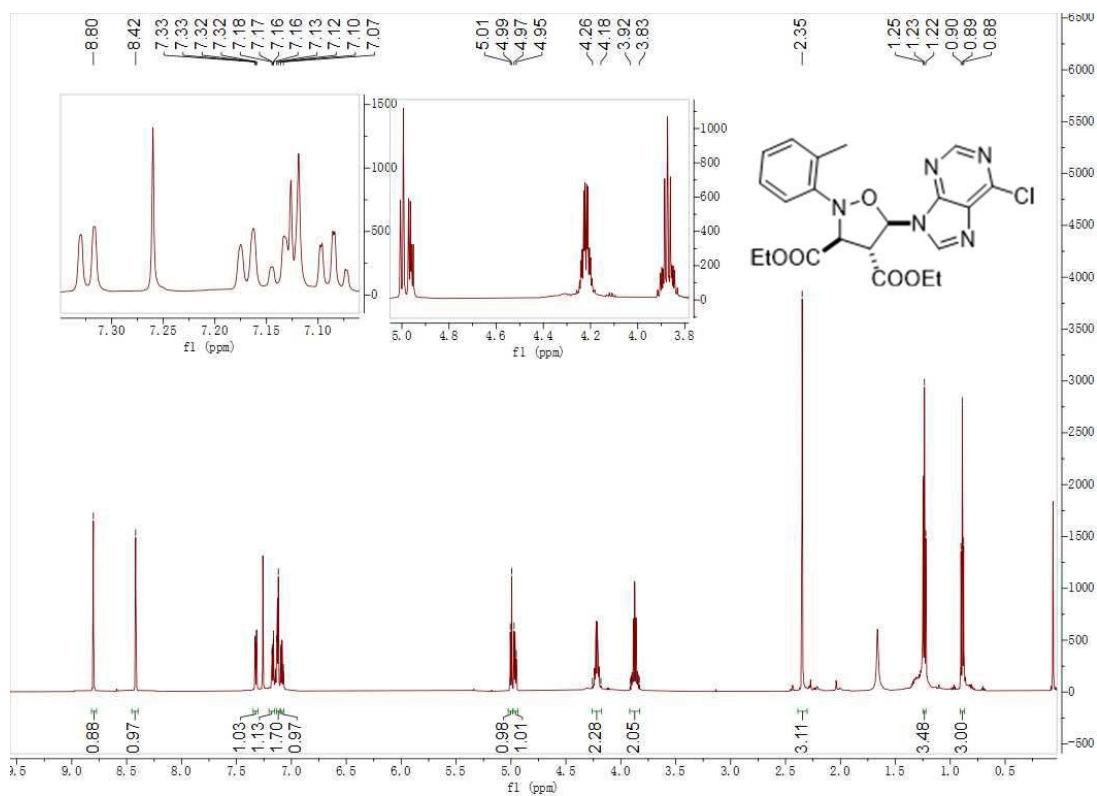

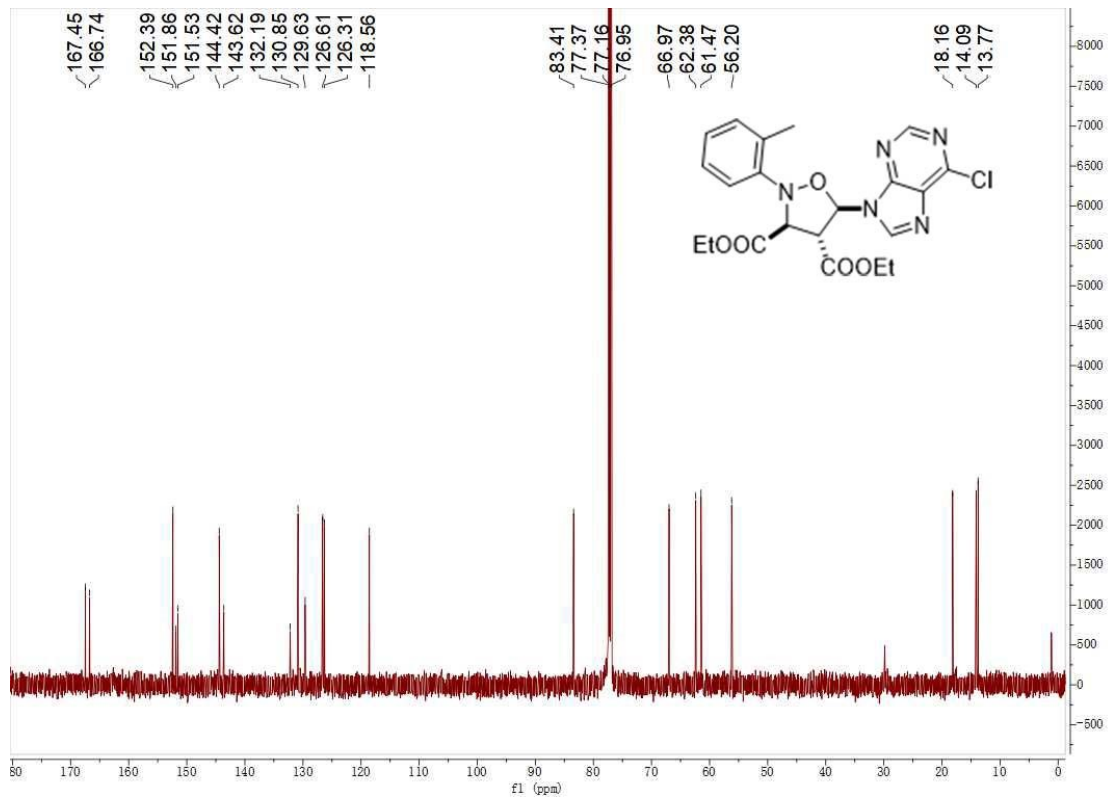

6m

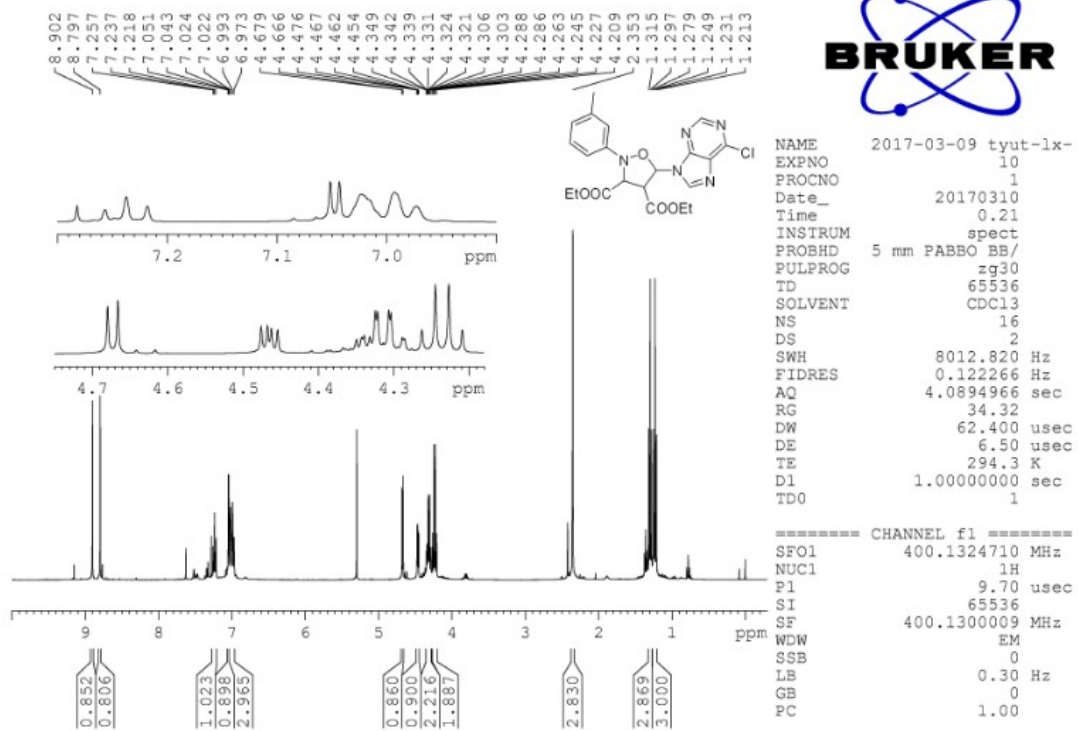

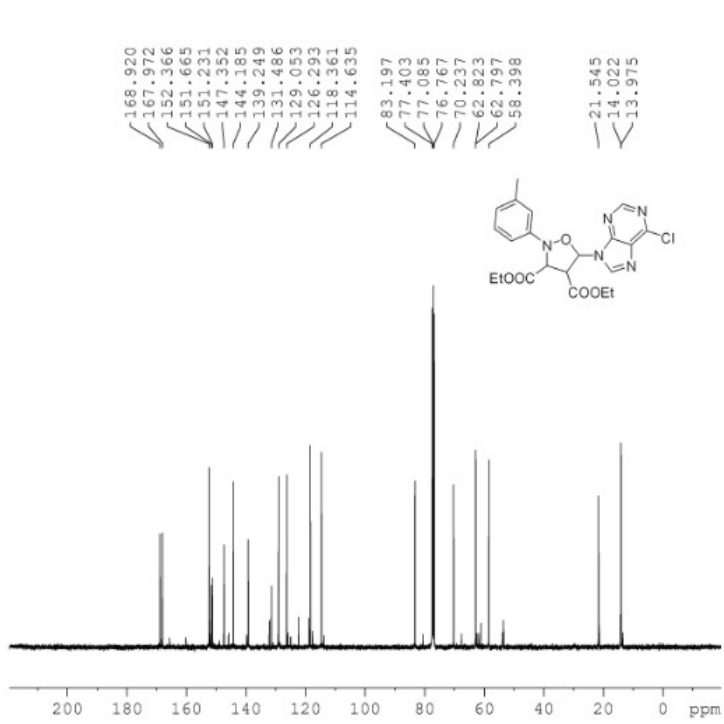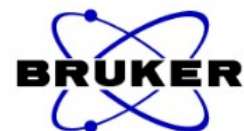

NAME 2017-03-09 tyut-lx-  
 EXPNO 11  
 PROCNO 1  
 Date\_ 20170310  
 Time 1.20  
 INSTRUM spect  
 PROBHD 5 mm PABBO BB/  
 PULPROG zgpg30  
 TD 65536  
 SOLVENT CDCl3  
 NS 1024  
 DS 4  
 SWH 24038.461 Hz  
 FIDRES 0.366798 Hz  
 AQ 1.3631988 sec  
 RG 185.43  
 DW 20.800 usec  
 DE 6.50 usec  
 TE 295.0 K  
 D1 2.00000000 sec  
 D11 0.03000000 sec  
 TDO 1

===== CHANNEL f1 =====  
 SFO1 100.6228293 MHz  
 NUC1 13C  
 P1 9.50 usec  
 SI 32768  
 SF 100.6127690 MHz  
 WDW EM  
 SSB 0  
 LB 1.00 Hz  
 GB 0  
 PC 1.40

6n

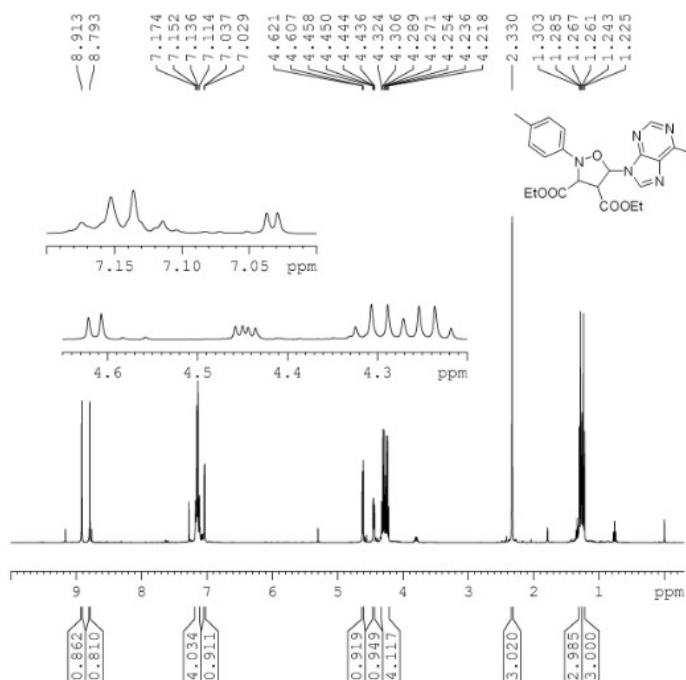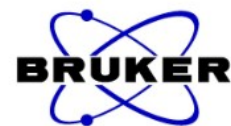

NAME 2017-03-09 tyut-lx-  
 EXPNO 10  
 PROCNO 1  
 Date\_ 20170310  
 Time 1.24  
 INSTRUM spect  
 PROBHD 5 mm PABBO BB/  
 PULPROG zg30  
 TD 65536  
 SOLVENT CDCl3  
 NS 16  
 DS 2  
 SWH 8012.820 Hz  
 FIDRES 0.122266 Hz  
 AQ 4.0894966 sec  
 RG 34.32  
 DW 62.400 usec  
 DE 6.50 usec  
 TE 294.3 K  
 D1 1.00000000 sec  
 TDO 1

===== CHANNEL f1 =====  
 SFO1 400.1324710 MHz  
 NUC1 1H  
 P1 9.70 usec  
 SI 65536  
 SF 400.1300040 MHz  
 WDW EM  
 SSB 0  
 LB 0.30 Hz  
 GB 0  
 PC 1.00

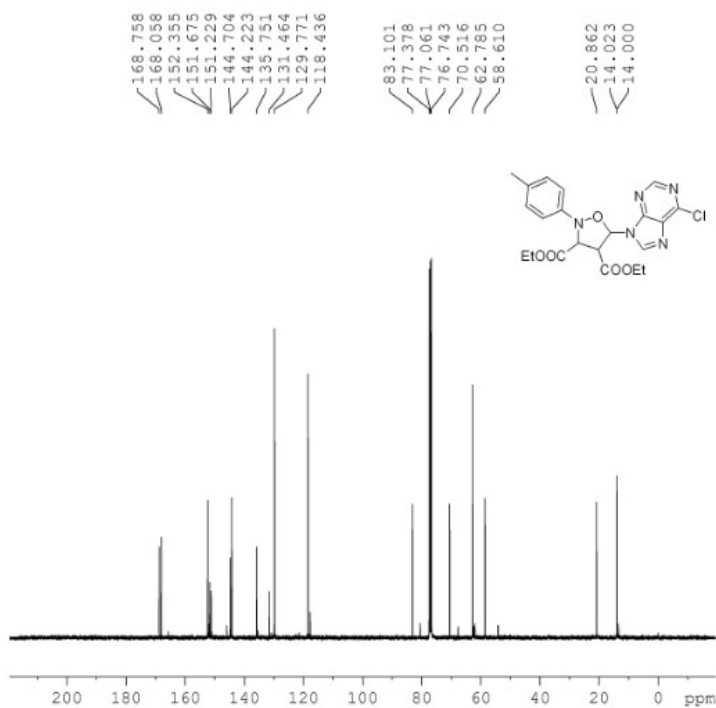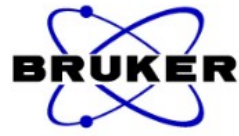

NAME 2017-03-09 tyut-lx-  
 EXPNO 11  
 PROCNO 1  
 Date\_ 20170310  
 Time 2.23  
 INSTRUM spect  
 PROBHD 5 mm PABBO BB/  
 PULPROG zgpgg30  
 TD 65536  
 SOLVENT CDC13  
 NS 1024  
 DS 4  
 SWH 24038.461 Hz  
 FIDRES 0.366798 Hz  
 AQ 1.3631988 sec  
 RG 185.43  
 DW 20.800 usec  
 DE 6.50 usec  
 TE 295.0 K  
 D1 2.00000000 sec  
 D11 0.03000000 sec  
 TD0 1

===== CHANNEL f1 =====  
 SFO1 100.6228293 MHz  
 NUC1 13C  
 P1 9.50 usec  
 SI 32768  
 SF 100.6127690 MHz  
 WDW EM  
 SSB 0  
 LB 1.00 Hz  
 GB 0  
 PC 1.40

endo-6q

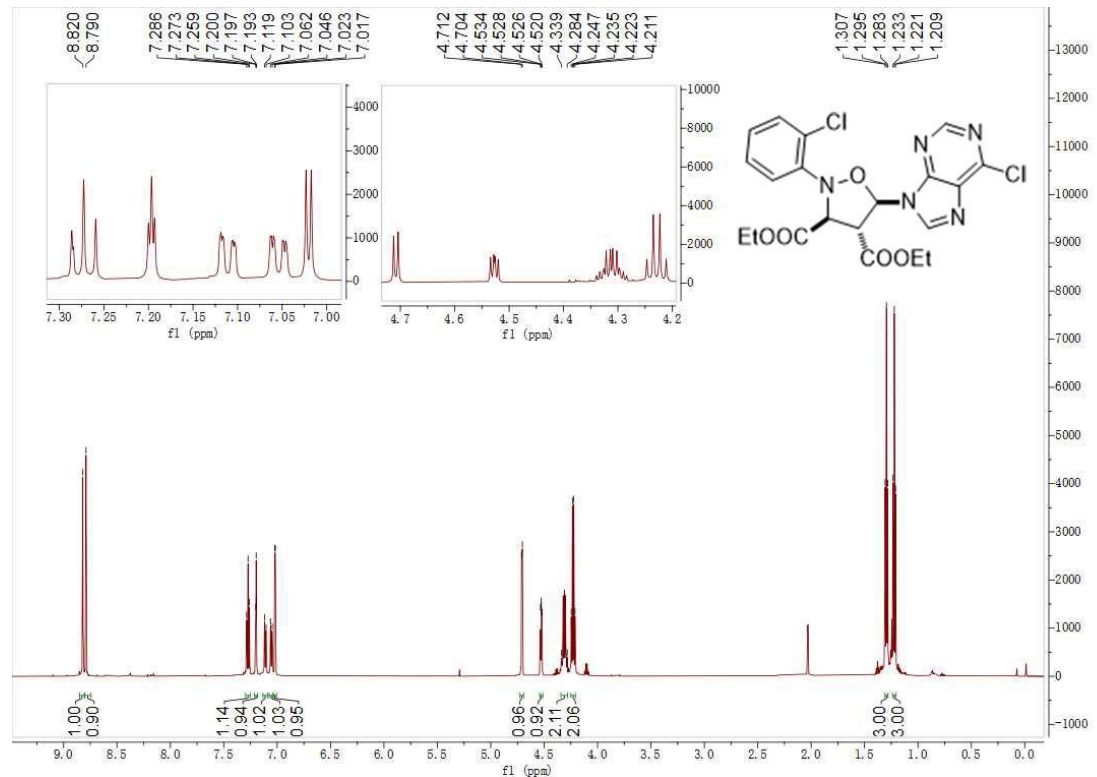

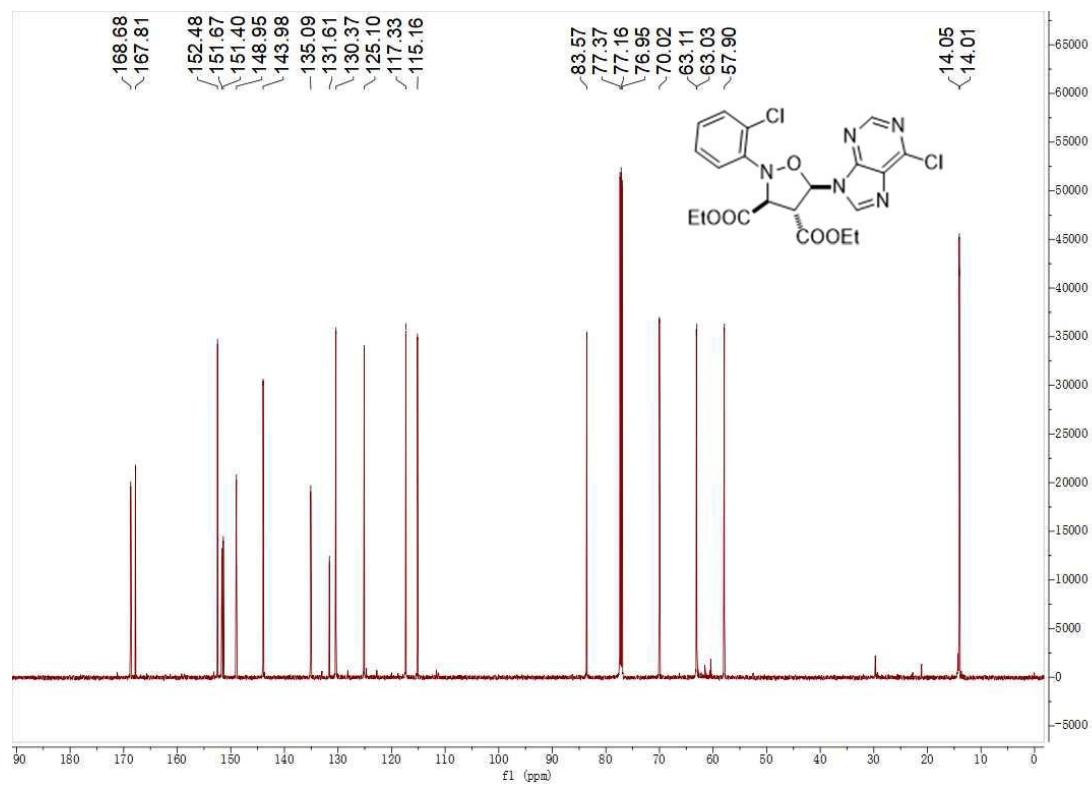

**exo-6q**

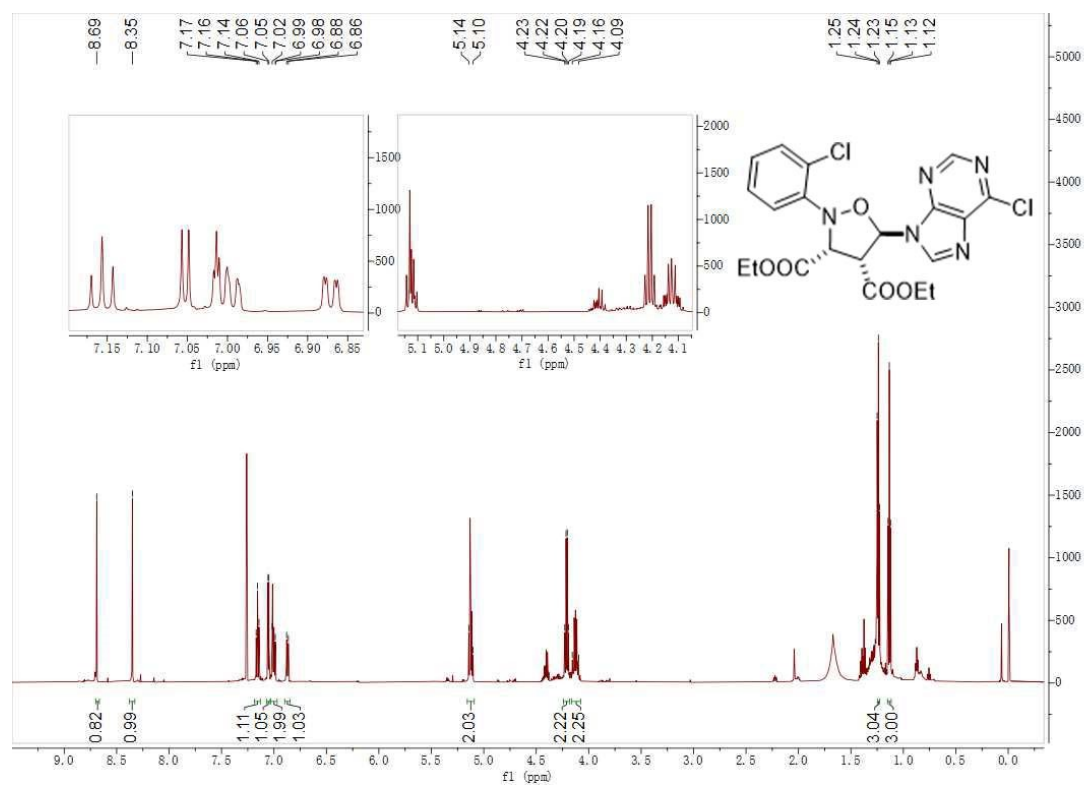

**6r**

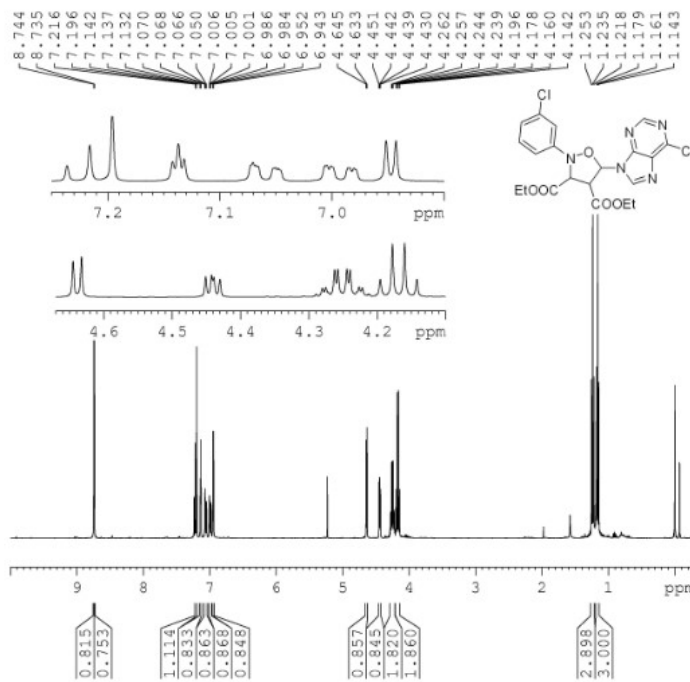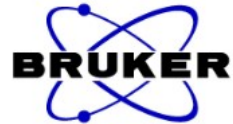

NAME 2017-03-10 tyut-chh  
 EXPNO 10  
 PROCNO 1  
 Date\_ 20170311  
 Time 0.22  
 INSTRUM spect  
 PROBHD 5 mm PABBO BB/  
 FULPROG zg30  
 TD 65536  
 SOLVENT CDCl3  
 NS 16  
 DS 2  
 SWH 8012.820 Hz  
 FIDRES 0.122266 Hz  
 AQ 4.0894966 sec  
 RG 74.25  
 DW 62.400 usec  
 DE 6.50 usec  
 TE 294.7 K  
 D1 1.00000000 sec  
 TD0 1

----- CHANNEL f1 -----  
 SFO1 400.1324710 MHz  
 NUC1 1H  
 P1 9.70 usec  
 SI 65536  
 SF 400.1300353 MHz  
 WDN EM  
 SSB 0  
 LB 0.30 Hz  
 GB 0  
 PC 1.00

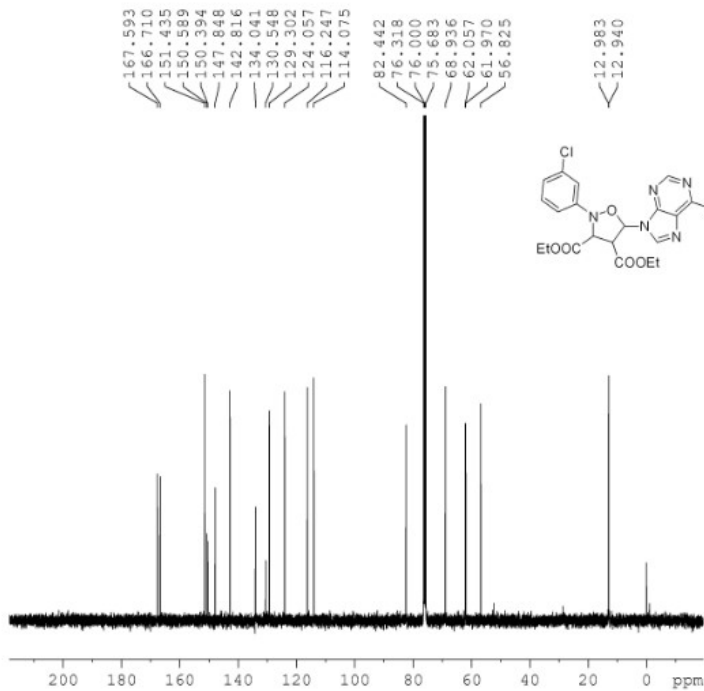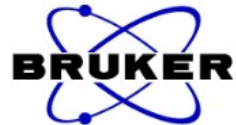

NAME 2017-03-10 tyut-chh  
 EXPNO 11  
 PROCNO 1  
 Date\_ 20170311  
 Time 1.21  
 INSTRUM spect  
 PROBHD 5 mm PABBO BB/  
 FULPROG zgpg30  
 TD 65536  
 SOLVENT CDCl3  
 NS 1024  
 DS 4  
 SWH 24038.461 Hz  
 FIDRES 0.366798 Hz  
 AQ 1.3631988 sec  
 RG 185.43  
 DW 20.800 usec  
 DE 6.50 usec  
 TE 295.3 K  
 D1 2.00000000 sec  
 D11 0.03000000 sec  
 TD0 1

----- CHANNEL f1 -----  
 SFO1 100.6228293 MHz  
 NUC1 13C  
 P1 9.50 usec  
 SI 32768  
 SF 100.6128730 MHz  
 WDN EM  
 SSB 0  
 LB 1.00 Hz  
 GB 0  
 PC 1.40

6s

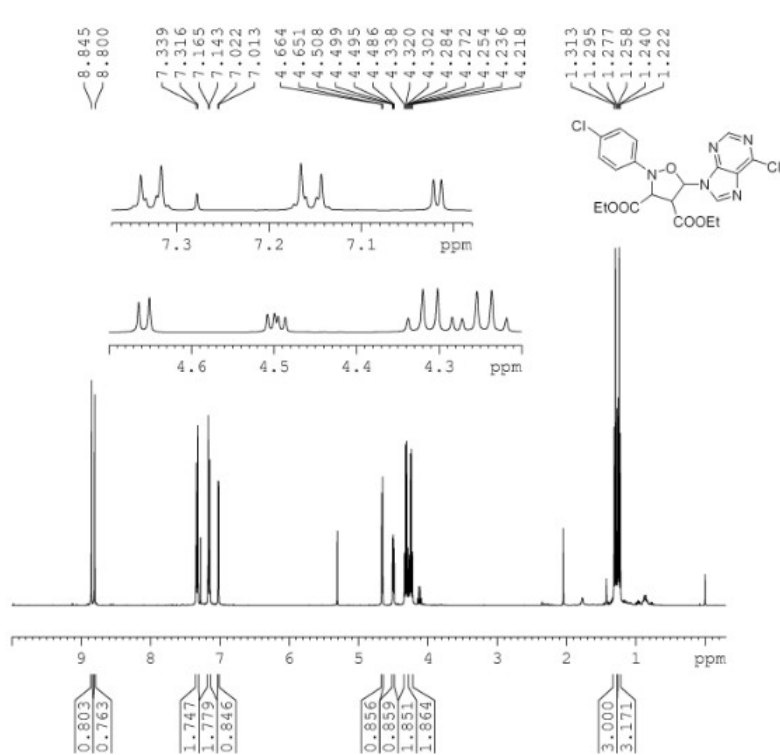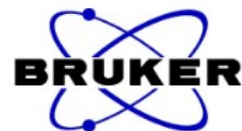

```

NAME      2017-03-10 tyut-chh
EXPNO     10
PROCNO    1
Date_     20170311
Time      1.25
INSTRUM   spect
PROBHD    5 mm PABBO BB/
PULPROG   zg30
TD        65536
SOLVENT   CDCl3
NS        16
DS        2
SWH       8012.820 Hz
FIDRES    0.122266 Hz
AQ        4.0894966 sec
RG        54.19
DW        62.400 usec
DE        6.50 usec
TE        294.6 K
D1        1.00000000 sec
TD0       1

===== CHANNEL f1 =====
SFO1     400.1324710 MHz
NUC1     1H
P1       9.70 usec
SI       65536
SF       400.1300024 MHz
WDW      EM
SSB      0
LB       0.30 Hz
GB       0
PC       1.00
  
```

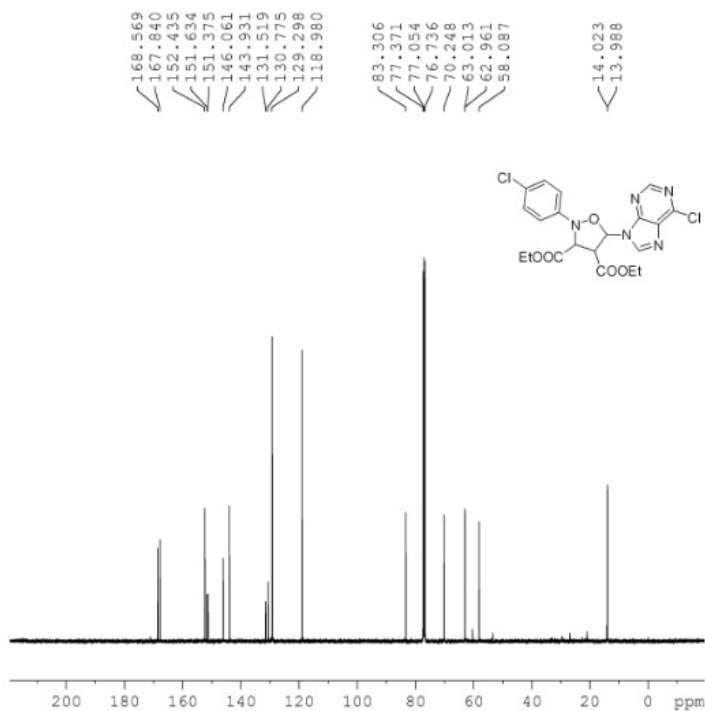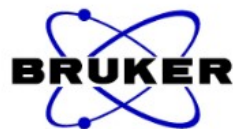

```

NAME      2017-03-10 tyut-chh
EXPNO     11
PROCNO    1
Date_     20170311
Time      2.24
INSTRUM   spect
PROBHD    5 mm PABBO BB/
PULPROG   zgpg30
TD        65536
SOLVENT   CDCl3
NS        1024
DS        4
SWH       24038.461 Hz
FIDRES    0.366798 Hz
AQ        1.3631988 sec
RG        185.43
DW        20.800 usec
DE        6.50 usec
TE        295.2 K
D1        2.00000000 sec
D11       0.03000000 sec
TD0       1

===== CHANNEL f1 =====
SFO1     100.6228293 MHz
NUC1     13C
P1       9.50 usec
SI       32768
SF       100.6127690 MHz
WDW      EM
SSB      0
LB       1.00 Hz
GB       0
PC       1.40
  
```

6t

S64



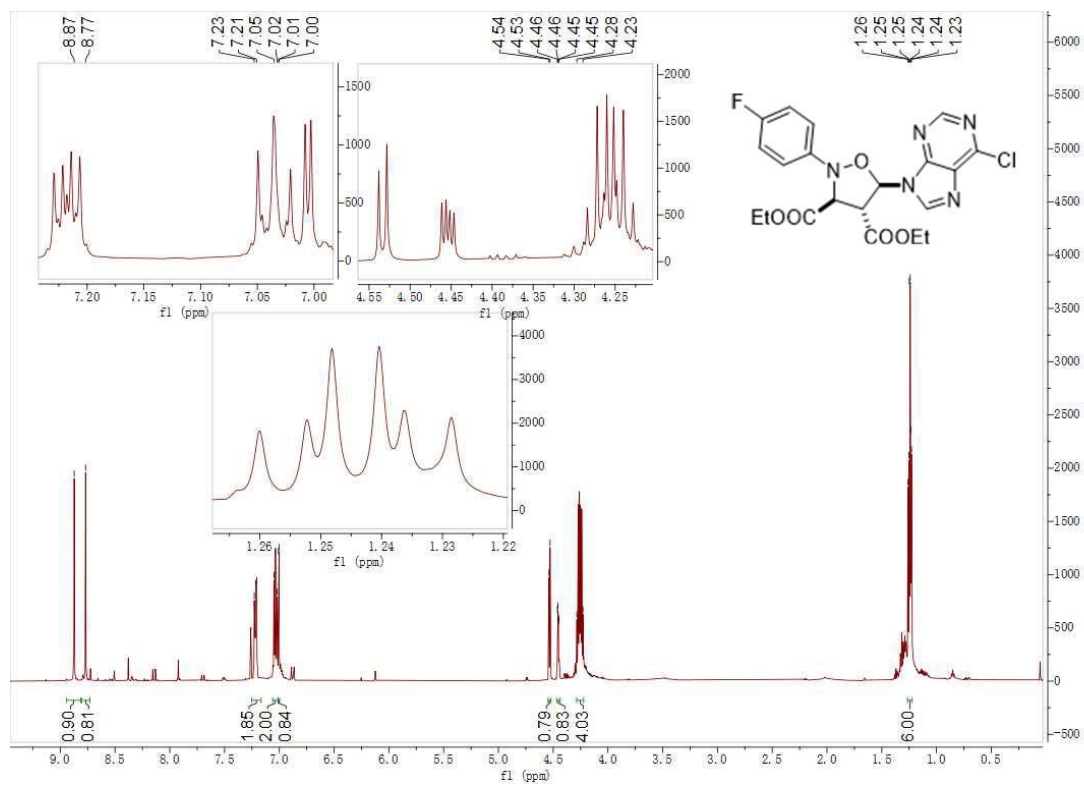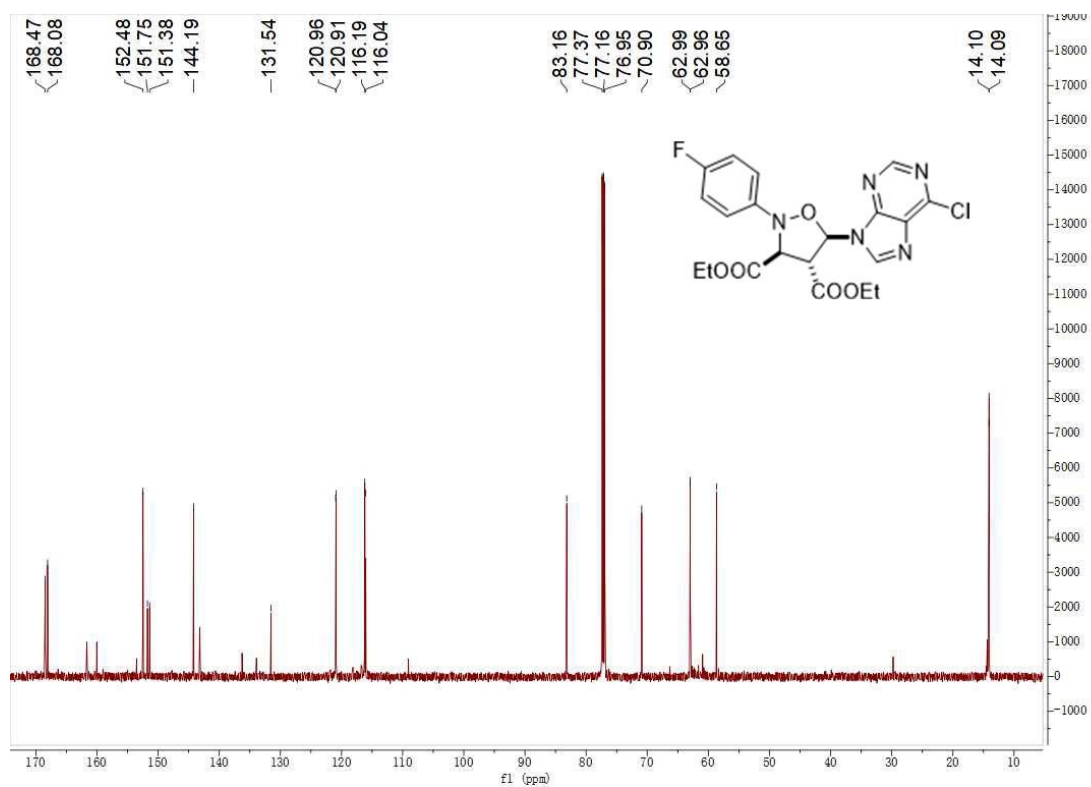

6u

S65

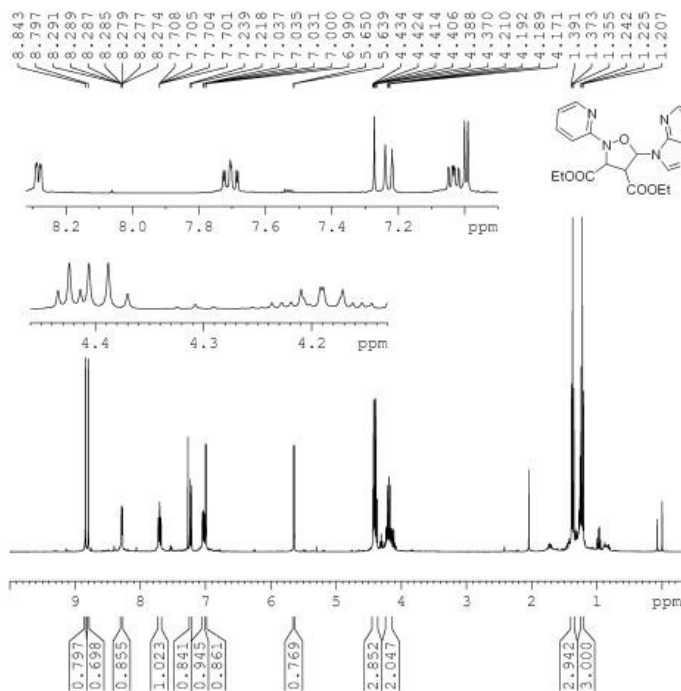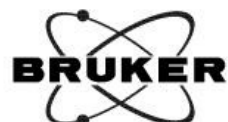

```

NAME      2014-04-06 tyut-lix
EXPNO     10
PROCNO    1
Date_     20170407
Time      1.15
INSTRUM   spect
PROBHD    5 mm PABBO BB/
PULPROG   zg30
TD        65536
SOLVENT   CDCl3
NS        16
DS        2
SWH       8012.820 Hz
FIDRES    0.122266 Hz
AQ        4.0894966 sec
RG        67.58
DW        62.400 usec
DE        6.50 usec
TE        298.3 K
D1        1.00000000 sec
TD0       1

===== CHANNEL f1 =====
SF01     400.1324710 MHz
NUC1     1H
P1       9.70 usec
SI       65536
SF       400.1300050 MHz
WDW      EM
SSB      0
LB       0.30 Hz
GB       0
PC       1.00
  
```

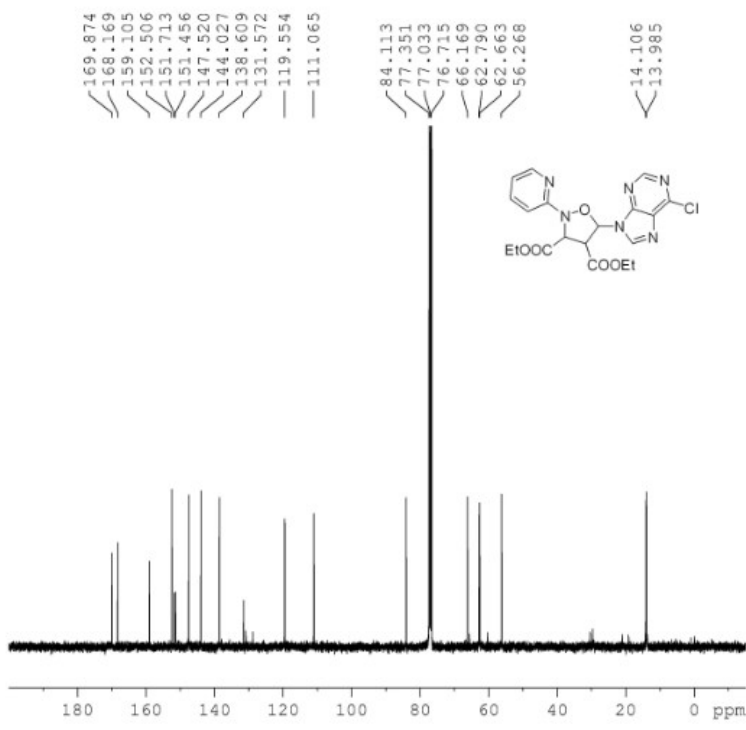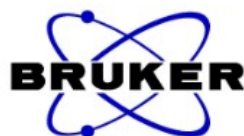

```

NAME      2014-04-06 tyut-lix
EXPNO     11
PROCNO    1
Date_     20170407
Time      2.14
INSTRUM   spect
PROBHD    5 mm PABBO BB/
PULPROG   zgpg30
TD        65536
SOLVENT   CDCl3
NS        1024
DS        4
SWH       24038.461 Hz
FIDRES    0.366798 Hz
AQ        1.3631988 sec
RG        185.43
DW        20.800 usec
DE        6.50 usec
TE        298.9 K
D1        2.00000000 sec
D11       0.03000000 sec
TD0       1

===== CHANNEL f1 =====
SF01     100.6228293 MHz
NUC1     13C
P1       9.50 usec
SI       32768
SF       100.6127690 MHz
WDW      EM
SSB      0
LB       1.00 Hz
GB       0
PC       1.40
  
```

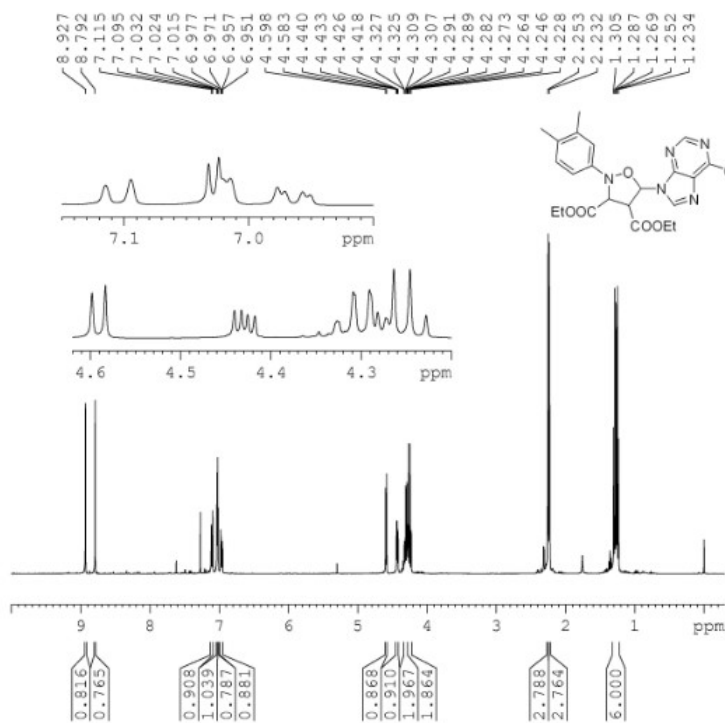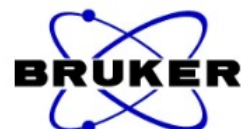

```

NAME      2017-03-11 tyut-lix
EXPNO    10
PROCNO   1
Date_    20170311
Time     18.54
INSTRUM  spect
PROBHD   5 mm PABBO BB/
PULPROG  zg30
TD       65536
SOLVENT  CDCl3
NS       16
DS       2
SWH      8012.820 Hz
FIDRES   0.122266 Hz
AQ       4.0894966 sec
RG       54.19
DW       62.400 usec
DE       6.50 usec
TE       294.2 K
D1       1.0000000 sec
D11      1
TD0      1
  
```

```

===== CHANNEL f1 =====
SF01    400.1324710 MHz
NUC1     1H
P1       9.70 usec
SI      65536
SF      400.1300046 MHz
WDW      EM
SSB      0
LB       0.30 Hz
GB       0
PC       1.00
  
```

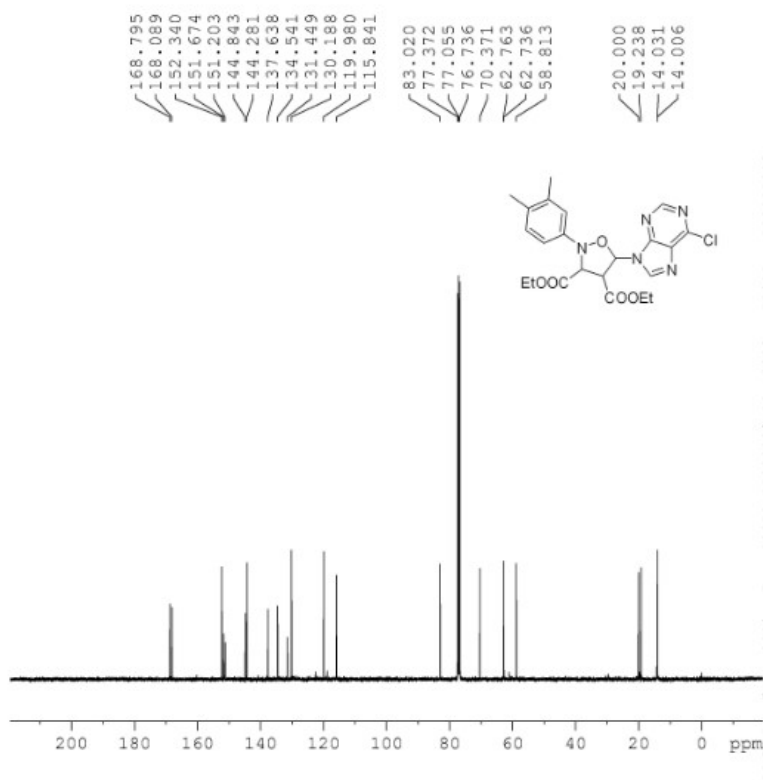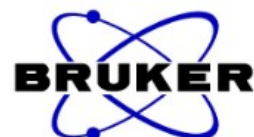

```

NAME      2017-03-11 tyut-lix
EXPNO    11
PROCNO   1
Date_    20170311
Time     19.53
INSTRUM  spect
PROBHD   5 mm PABBO BB/
PULPROG  zgpg30
TD       65536
SOLVENT  CDCl3
NS       1024
DS       4
SWH      24038.461 Hz
FIDRES   0.366798 Hz
AQ       1.3631988 sec
RG       185.43
DW       20.800 usec
DE       6.50 usec
TE       295.2 K
D1       2.0000000 sec
D11      0.0300000 sec
TD0      1
  
```

```

===== CHANNEL f1 =====
SF01    100.6228293 MHz
NUC1     13C
P1       9.50 usec
SI      32768
SF      100.6127690 MHz
WDW      EM
SSB      0
LB       1.00 Hz
GB       0
PC       1.40
  
```

6w

S67

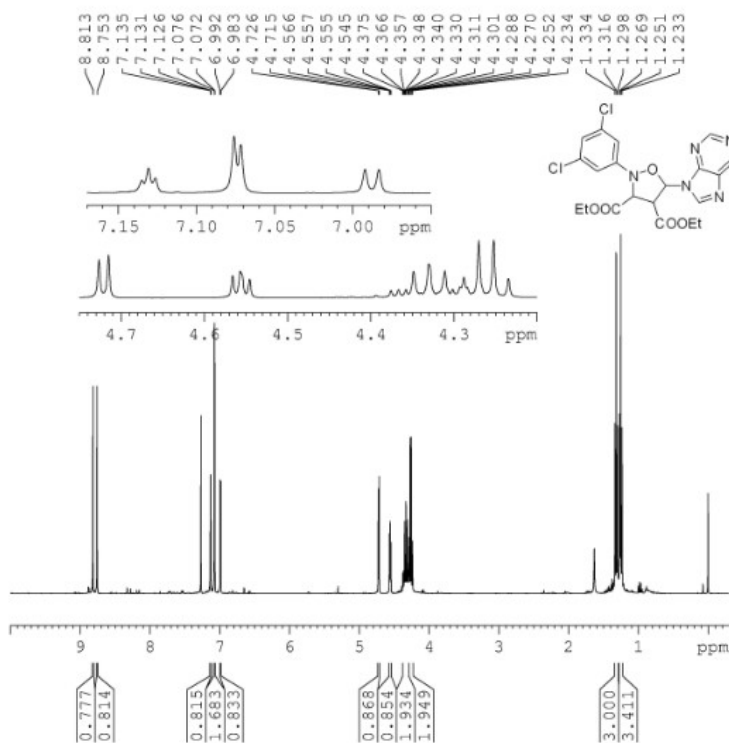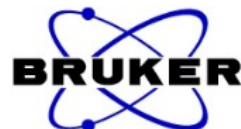

```

NAME      2017-03-11 tyut-lix
EXPNO    10
PROCNO   1
Date_    20170311
Time     19.57
INSTRUM  spect
PROBHD   5 mm PABBO BB/
PULPROG  zg30
TD       65536
SOLVENT  CDCl3
NS       16
DS       2
SWH      8012.820 Hz
FIDRES   0.122266 Hz
AQ       4.0894966 sec
RG       87.46
DW       62.400 usec
DE       6.50 usec
TE       294.5 K
D1       1.00000000 sec
TD0      1
  
```

```

===== CHANNEL f1 =====
SFO1    400.1324710 MHz
NUC1     1H
P1       9.70 usec
SI      65536
SF      400.1300066 MHz
WDW      EM
SSB      0
LB       0.30 Hz
GB       0
PC       1.00
  
```

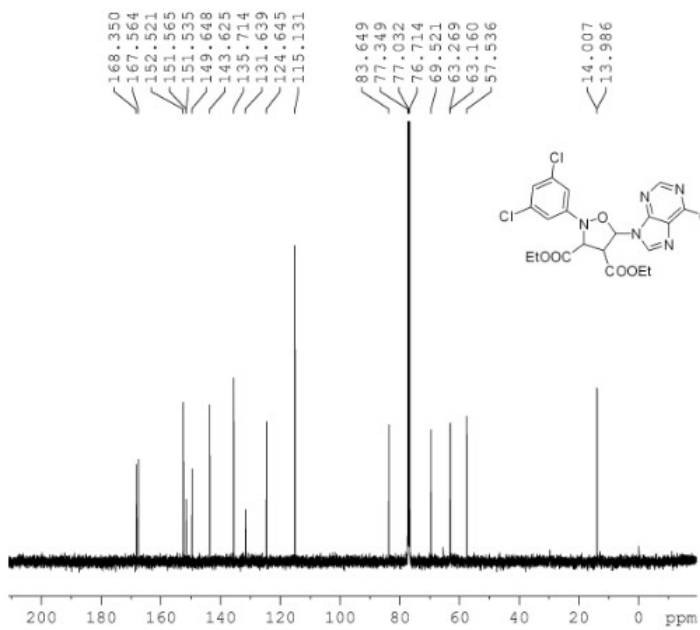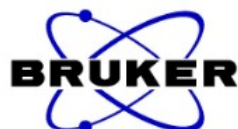

```

NAME      2017-03-11 tyut-lix
EXPNO    11
PROCNO   1
Date_    20170311
Time     20.56
INSTRUM  spect
PROBHD   5 mm PABBO BB/
PULPROG  zgpg30
TD       65536
SOLVENT  CDCl3
NS       1024
DS       4
SWH      24038.461 Hz
FIDRES   0.366798 Hz
AQ       1.3631988 sec
RG       185.43
DW       20.800 usec
DE       6.50 usec
TE       295.2 K
D1       2.00000000 sec
D11      0.03000000 sec
TD0      1
  
```

```

===== CHANNEL f1 =====
SFO1    100.6228293 MHz
NUC1     13C
P1       9.50 usec
SI      32768
SF      100.6127690 MHz
WDW      EM
SSB      0
LB       1.00 Hz
GB       0
PC       1.40
  
```

6x

S68

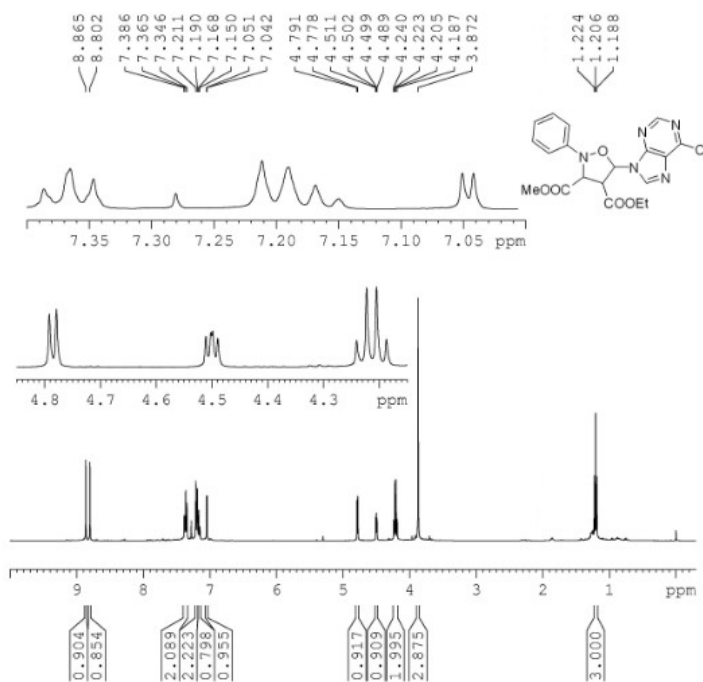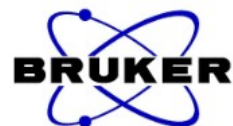

NAME 2017-03-08 tyut-chh  
 EXPNO 10  
 PROCNO 1  
 Date\_ 20170309  
 Time 9.00  
 INSTRUM spect  
 PROBHD 5 mm PABBO BB/  
 PULPROG zg30  
 TD 65536  
 SOLVENT CDCl3  
 NS 16  
 DS 2  
 SWH 8012.820 Hz  
 FIDRES 0.122266 Hz  
 AQ 4.0894966 sec  
 RG 34.32  
 DW 62.400 usec  
 DE 6.50 usec  
 TE 293.5 K  
 D1 1.00000000 sec  
 TD0 1

===== CHANNEL f1 =====  
 SFO1 400.1324710 MHz  
 NUC1 1H  
 P1 9.70 usec  
 SI 65536  
 SF 400.1300014 MHz  
 WDW EM  
 SSB 0  
 LB 0.30 Hz  
 GB 0  
 PC 1.00

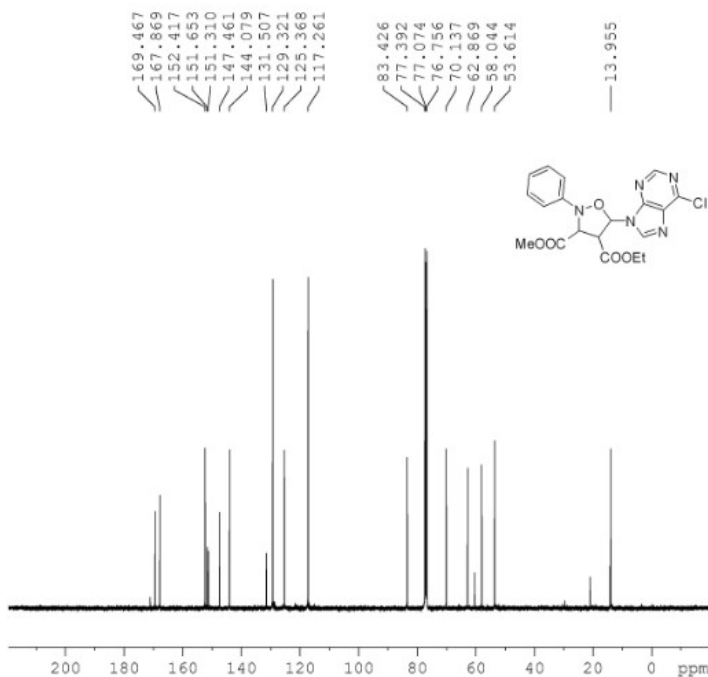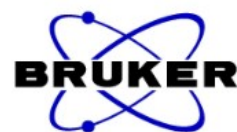

NAME 2017-03-08 tyut-chh  
 EXPNO 11  
 PROCNO 1  
 Date\_ 20170309  
 Time 9.59  
 INSTRUM spect  
 PROBHD 5 mm PABBO BB/  
 PULPROG zgpg30  
 TD 65536  
 SOLVENT CDCl3  
 NS 1024  
 DS 4  
 SWH 24038.461 Hz  
 FIDRES 0.366798 Hz  
 AQ 1.3631988 sec  
 RG 185.43  
 DW 20.800 usec  
 DE 6.50 usec  
 TE 294.4 K  
 D1 2.00000000 sec  
 D11 0.03000000 sec  
 TD0 1

===== CHANNEL f1 =====  
 SFO1 100.6228293 MHz  
 NUC1 13C  
 P1 9.50 usec  
 SI 32768  
 SF 100.6127690 MHz  
 WDW EM  
 SSB 0  
 LB 1.00 Hz  
 GB 0  
 PC 1.40

6y

S69

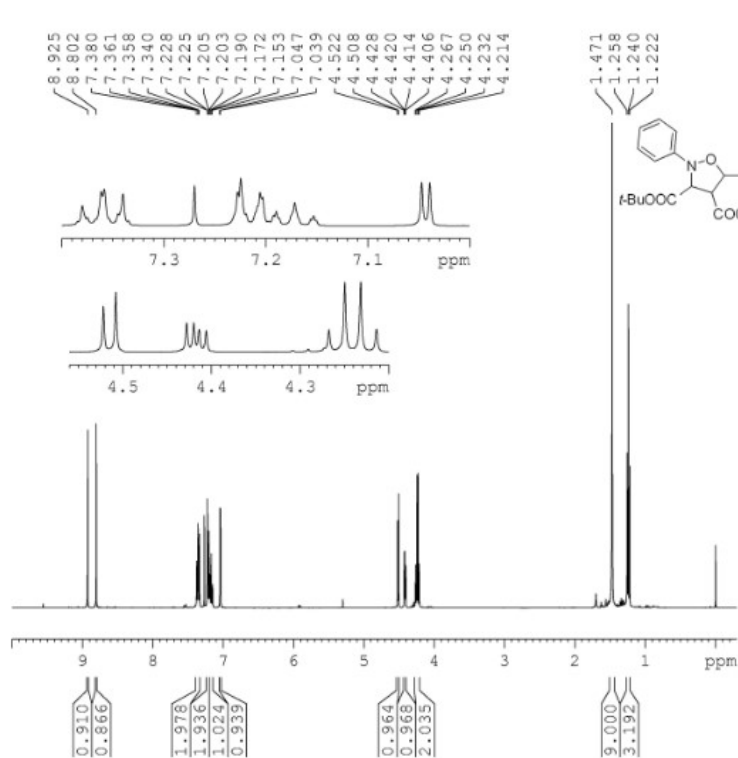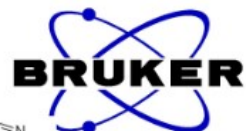

AME 2017-03-09 tyut  
 XPNO 10  
 ROCNO 1  
 Date\_ 20170310  
 Time 2.27  
 INSTRUM spect  
 PROBHD 5 mm PABBO BB/  
 PULPROG zg30  
 TD 65536  
 SOLVENT CDCl3  
 NS 16  
 DS 2  
 SWH 8012.820  
 FIDRES 0.122266  
 AQ 4.0894966  
 RG 60.71  
 DW 62.400  
 DE 6.50  
 TE 294.3  
 D1 1.00000000  
 TD0 1

===== CHANNEL f1 =====  
 SFO1 400.1324710  
 NUC1 1H  
 P1 9.70  
 SI 65536  
 SF 400.1300060  
 WDW EM  
 SSB 0  
 LB 0.30  
 GB 0  
 PC 1.00

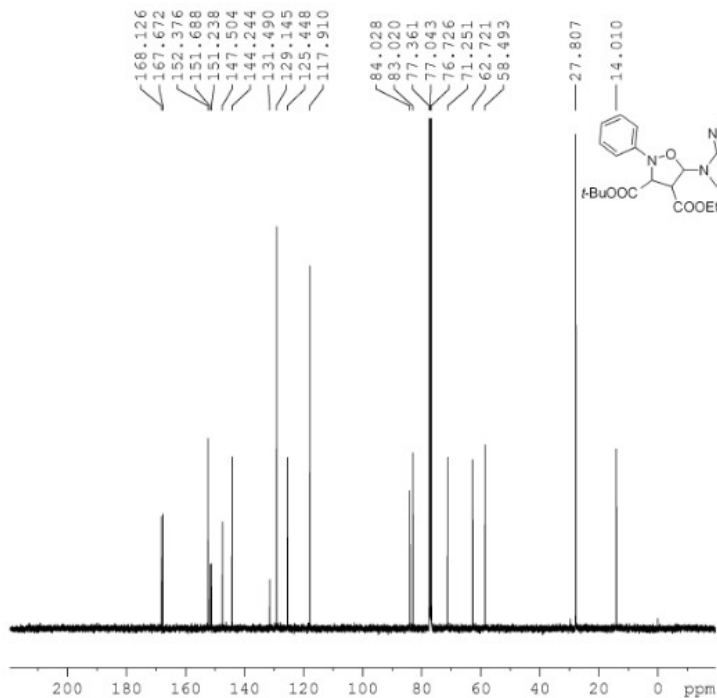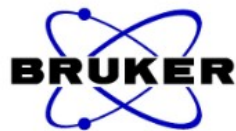

NAME 2017-03-09 tyut  
 EXPNO 11  
 PROCNO 1  
 Date\_ 20170310  
 Time 3.26  
 INSTRUM spect  
 PROBHD 5 mm PABBO BB/  
 PULPROG zgpg30  
 TD 65536  
 SOLVENT CDCl3  
 NS 1024  
 DS 4  
 SWH 24038.461  
 FIDRES 0.366798  
 AQ 1.3631988  
 RG 185.43  
 DW 20.800  
 DE 6.50  
 TE 294.9  
 D1 2.00000000  
 D11 0.03000000  
 TD0 1

===== CHANNEL f1 =====  
 SFO1 100.6228293  
 NUC1 13C  
 P1 9.50  
 SI 32768  
 SF 100.6127690  
 WDW EM  
 SSB 0  
 LB 1.00  
 GB 0  
 PC 1.40

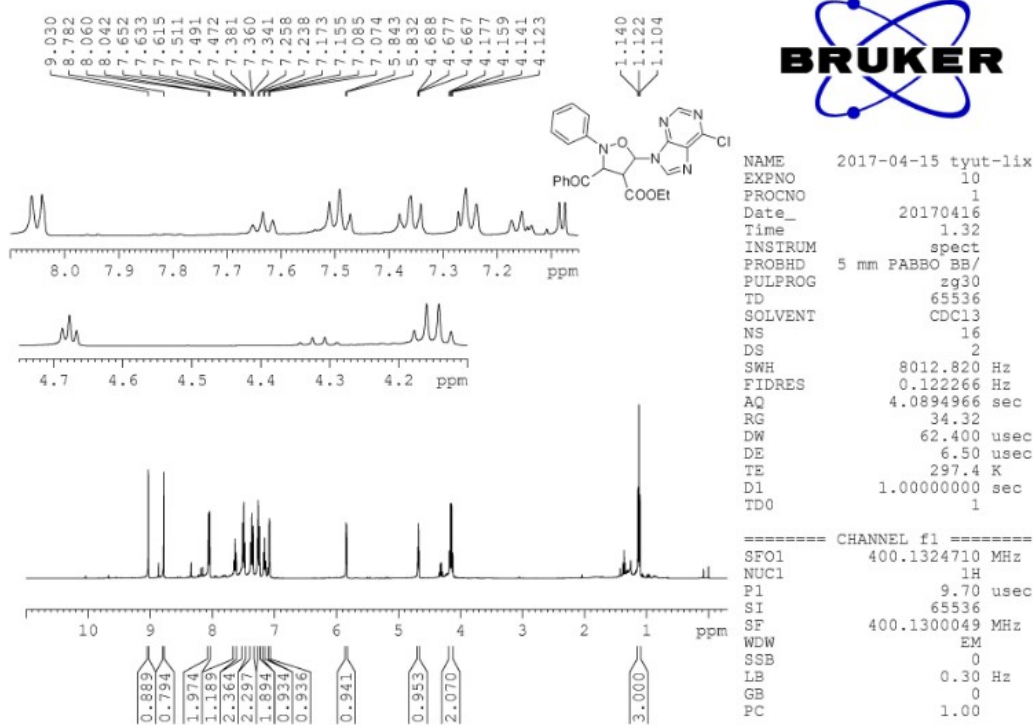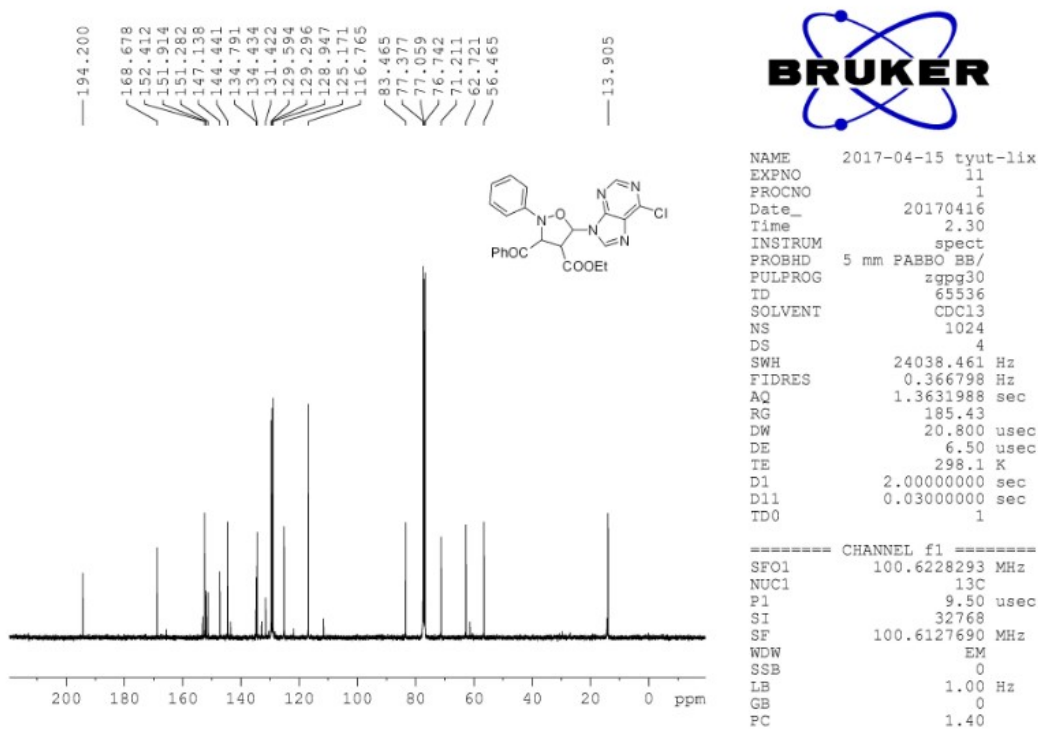

## 12. <sup>1</sup>H-NMR and <sup>13</sup>C-NMR spectra of products 8

8a

S71

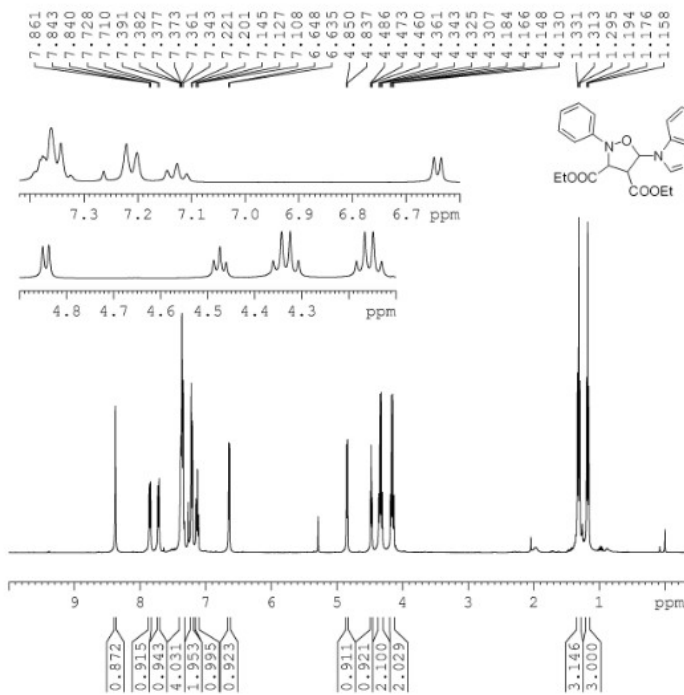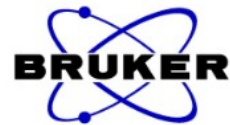

```

NAME      2017-03-11 tyut-lix
EXPNO    10
PROCNO   1
Date_    20170311
Time     21.00
INSTRUM spect
PROBHD   5 mm PABBO BB/
PULPROG zg30
TD       65536
SOLVENT  CDC13
NS       16
DS       2
SWH      8012.820 Hz
FIDRES   0.122266 Hz
AQ       4.0894966 sec
RG       34.32
DW       62.400 usec
DE       6.50 usec
TE       294.5 K
D1       1.00000000 sec
TDO     1

===== CHANNEL f1 =====
SFO1    400.1324710 MHz
NUC1     1H
P1       9.70 usec
SI       65536
SF       400.1300082 MHz
WDW      EM
SSB      0
LB       0.30 Hz
GB       0
PC       1.00
  
```

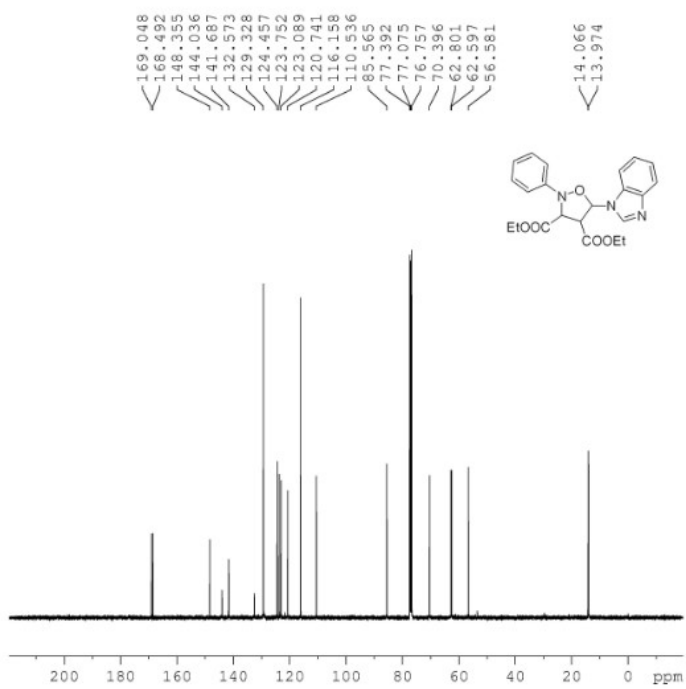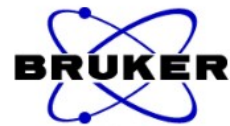

```

NAME      2017-03-11 tyut-lix
EXPNO    11
PROCNO   1
Date_    20170311
Time     21.59
INSTRUM spect
PROBHD   5 mm PABBO BB/
PULPROG zgpg30
TD       65536
SOLVENT  CDC13
NS       1024
DS       4
SWH      24038.461 Hz
FIDRES   0.366798 Hz
AQ       1.3631988 sec
RG       185.43
DW       20.800 usec
DE       6.50 usec
TE       295.3 K
D1       2.00000000 sec
D11     0.03000000 sec
TDO     1

===== CHANNEL f1 =====
SFO1    100.6228293 MHz
NUC1    13C
P1       9.50 usec
SI       32768
SF       100.6127690 MHz
WDW      EM
SSB      0
LB       1.00 Hz
GB       0
PC       1.40
  
```

8b



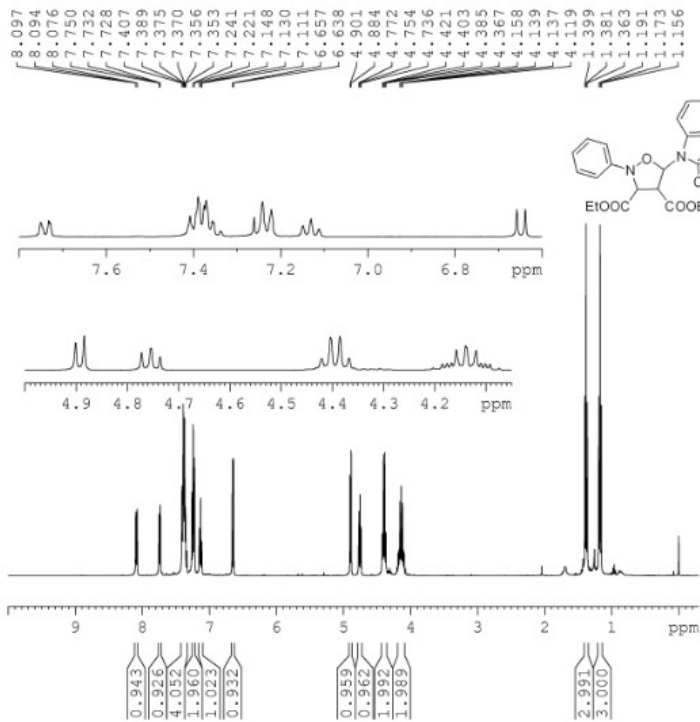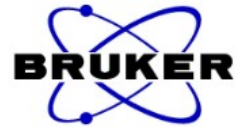

```

NAME      2017-03-24 tyut-lix
EXPNO    10
PROCNO   1
Date_    20170324
Time     21.55
INSTRUM  spect
PROBHD   5 mm PABBO BB/
PULPROG  zg30
TD       65536
SOLVENT  CDC13
NS       16
DS       2
SWH      8012.820 Hz
FIDRES   0.122266 Hz
AQ       4.0894966 sec
RG       54.19
DW       62.400 usec
DE       6.50 usec
TE       295.2 K
D1       1.0000000 sec
TD0      1

===== CHANNEL f1 =====
SFO1    400.1324710 MHz
NUC1     1H
P1       9.70 usec
SI       65536
SF       400.1300093 MHz
WDW      EM
SSB      0
LB       0.30 Hz
GB       0
PC       1.00
  
```

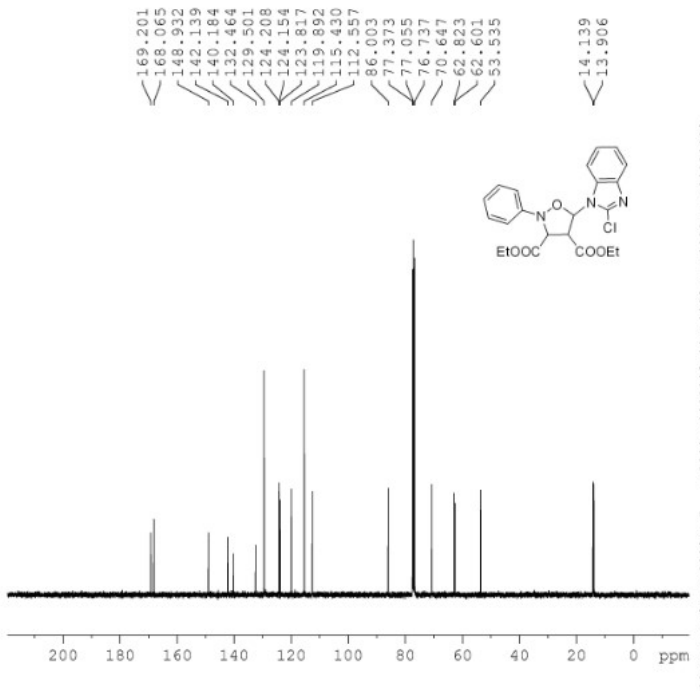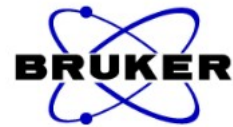

```

NAME      2017-03-24 tyut-lix
EXPNO    11
PROCNO   1
Date_    20170324
Time     22.12
INSTRUM  spect
PROBHD   5 mm PABBO BB/
PULPROG  zgpg30
TD       65536
SOLVENT  CDC13
NS       399
DS       4
SWH      24038.461 Hz
FIDRES   0.366798 Hz
AQ       1.3631988 sec
RG       185.43
DW       20.800 usec
DE       6.50 usec
TE       295.9 K
D1       2.0000000 sec
D11      0.0300000 sec
TD0      1

===== CHANNEL f1 =====
SFO1    100.6228293 MHz
NUC1     13C
P1       9.50 usec
SI       32768
SF       100.6127690 MHz
WDW      EM
SSB      0
LB       1.00 Hz
GB       0
PC       1.40
  
```

8c

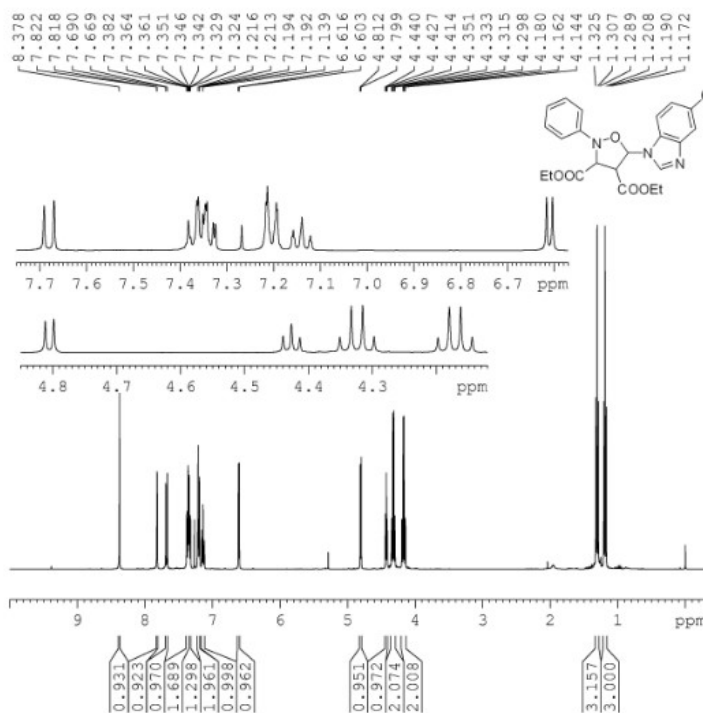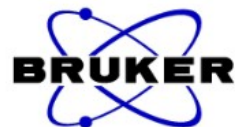

NAME 2017-03-24 tyut-lix  
 EXPNO 10  
 PROCNO 1  
 Date\_ 20170324  
 Time 22.22  
 INSTRUM spect  
 PROBHD 5 mm PABBO BB/  
 PULPROG zg30  
 TD 65536  
 SOLVENT CDCl3  
 NS 16  
 DS 2  
 SWH 8012.820 Hz  
 FIDRES 0.122266 Hz  
 AQ 4.0894966 sec  
 RG 34.32  
 DW 62.400 usec  
 DE 6.50 usec  
 TE 295.3 K  
 D1 1.00000000 sec  
 TD0 1

===== CHANNEL f1 =====  
 SFO1 400.1324710 MHz  
 NUC1 1H  
 P1 9.70 usec  
 SI 65536  
 SF 400.1300063 MHz  
 WDW EM  
 SSB 0  
 LB 0.30 Hz  
 GB 0  
 PC 1.00

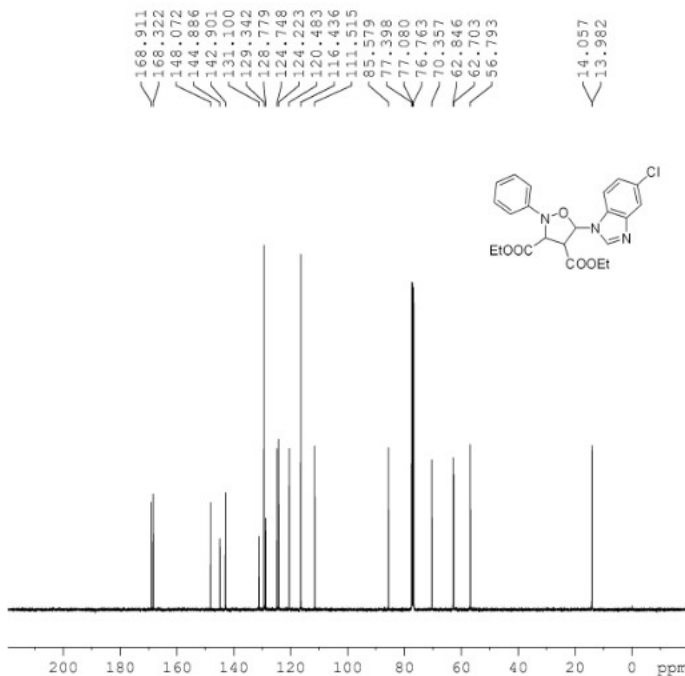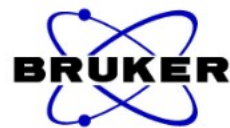

NAME 2017-03-24 tyut-lix  
 EXPNO 11  
 PROCNO 1  
 Date\_ 20170324  
 Time 23.21  
 INSTRUM spect  
 PROBHD 5 mm PABBO BB/  
 PULPROG zgpg30  
 TD 65536  
 SOLVENT CDCl3  
 NS 1024  
 DS 4  
 SWH 24038.461 Hz  
 FIDRES 0.366798 Hz  
 AQ 1.3631988 sec  
 RG 185.43  
 DW 20.800 usec  
 DE 6.50 usec  
 TE 295.7 K  
 D1 2.00000000 sec  
 D11 0.03000000 sec  
 TD0 1

===== CHANNEL f1 =====  
 SFO1 100.6228293 MHz  
 NUC1 13C  
 P1 9.50 usec  
 SI 32768  
 SF 100.6127690 MHz  
 WDW EM  
 SSB 0  
 LB 1.00 Hz  
 GB 0  
 PC 1.40

8d

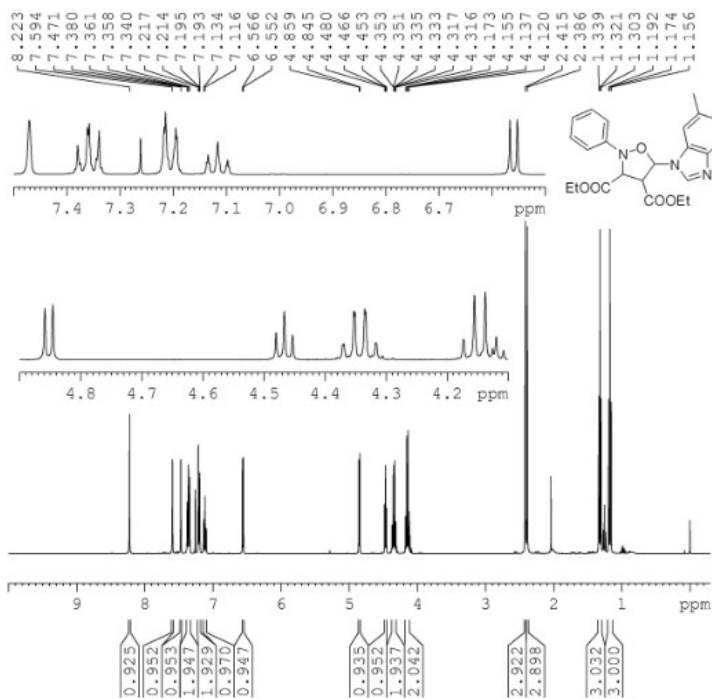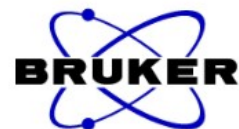

```

NAME      2017-03-23 tyut-lix
EXPNO    10
PROCNO   1
Date_    20170323
Time     23.01
INSTRUM  spect
PROBHD   5 mm PABBO BB/
PULPROG  zg30
ID       65536
SOLVENT  CDCl3
NS       16
DS       2
SWH      8012.820 Hz
FIDRES   0.122266 Hz
AQ       4.0894966 sec
RG       34.32
DW       62.400 usec
DE       6.50 usec
TE       295.5 K
D1       1.00000000 sec
TD0      1
  
```

```

===== CHANNEL f1 =====
SFO1    400.1324710 MHz
NUC1     1H
P1       9.70 usec
SI      65536
SF      400.1300092 MHz
WDW      EM
SSB      0
LB      0.30 Hz
GB      0
PC      1.00
  
```

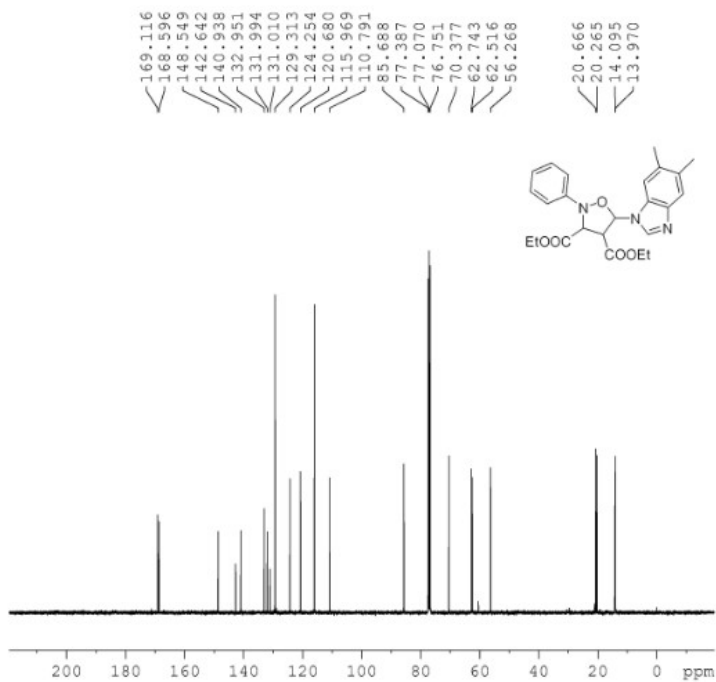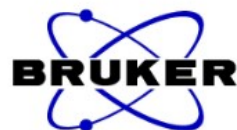

```

NAME      2017-03-23 tyut-lix
EXPNO    11
PROCNO   1
Date_    20170324
Time     0.00
INSTRUM  spect
PROBHD   5 mm PABBO BB/
PULPROG  zgpg30
TD       65536
SOLVENT  CDCl3
NS       1024
DS       4
SWH      24038.461 Hz
FIDRES   0.366798 Hz
AQ       1.3631988 sec
RG       185.43
DW       20.800 usec
DE       6.50 usec
TE       296.5 K
D1       2.00000000 sec
D11      0.03000000 sec
TD0      1
  
```

```

===== CHANNEL f1 =====
SFO1    100.6228293 MHz
NUC1    13C
P1       9.50 usec
SI      32768
SF      100.6127690 MHz
WDW      EM
SSB      0
LB      1.00 Hz
GB      0
PC      1.40
  
```

8e

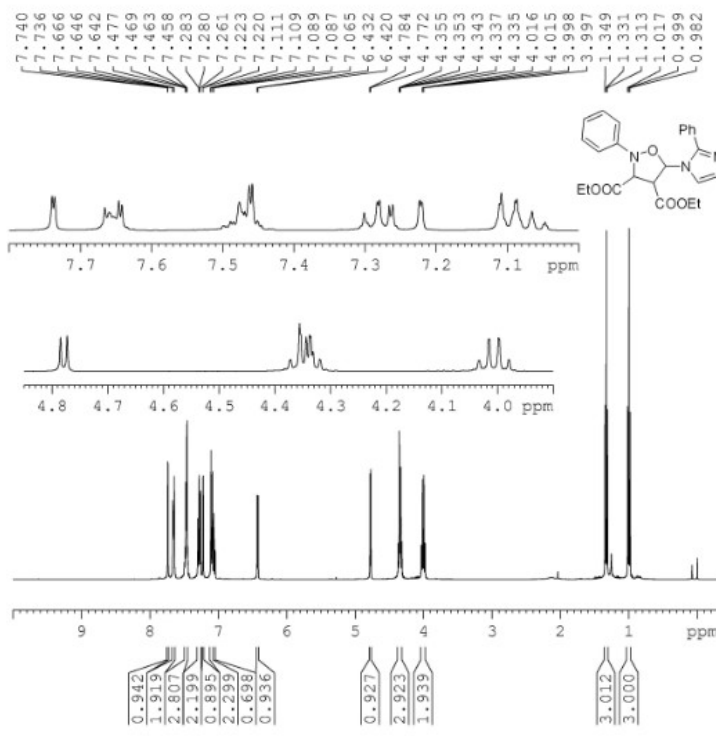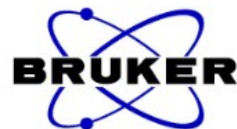

```

NAME      2017-03-24 tyut-lix
EXPNO    10
PROCNO   1
Date_    20170324
Time     23.25
INSTRUM  spect
PROBHD   5 mm PABBO BB/
PULPROG  zg30
TD       65536
SOLVENT  CDCl3
NS       16
DS       2
SWH      8012.820 Hz
FIDRES   0.122266 Hz
AQ       4.0894966 sec
RG       34.32
DW       62.400 usec
DE       6.50 usec
TE       295.2 K
D1       1.00000000 sec
TD0      1

===== CHANNEL f1 =====
SFO1    400.1324710 MHz
NUC1     1H
P1       9.70 usec
SI       65536
SF       400.1300072 MHz
WDW      EM
SSB      0
LB       0.30 Hz
GB       0
PC       1.00
  
```

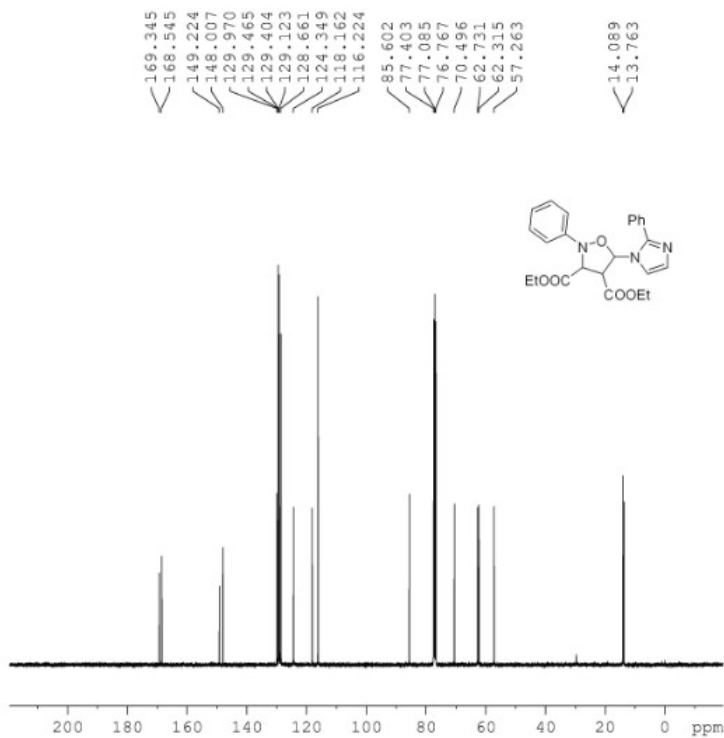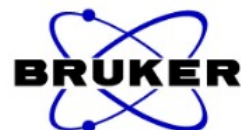

```

NAME      2017-03-24 tyut-lix
EXPNO    11
PROCNO   1
Date_    20170325
Time     0.24
INSTRUM  spect
PROBHD   5 mm PABBO BB/
PULPROG  zgpg30
TD       65536
SOLVENT  CDCl3
NS       1024
DS       4
SWH      24038.461 Hz
FIDRES   0.366798 Hz
AQ       1.3631988 sec
RG       185.43
DW       20.800 usec
DE       6.50 usec
TE       295.7 K
D1       2.00000000 sec
D11      0.03000000 sec
TD0      1

===== CHANNEL f1 =====
SFO1    100.6228293 MHz
NUC1     13C
P1       9.50 usec
SI       32768
SF       100.6127690 MHz
WDW      EM
SSB      0
LB       1.00 Hz
GB       0
PC       1.40
  
```

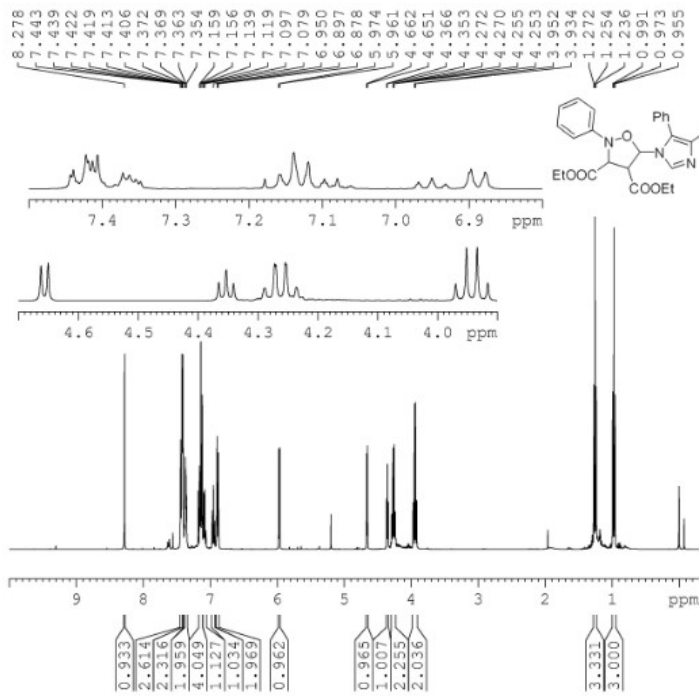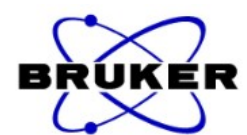

```

NAME      2017-03-27 tyut-lix
EXPNO    10
PROCNO   1
Date_    20170327
Time     23.01
INSTRUM  spect
PROBHD   5 mm PABBO BB/
PULPROG  zg30
TD       65536
SOLVENT  CDCl3
NS       16
DS       2
SWH      8012.820 Hz
FIDRES   0.122266 Hz
AQ       4.0894966 sec
RG       34.32
DW       62.400 usec
DE       6.50 usec
TE       297.3 K
D1       1.00000000 sec
TD0      1

===== CHANNEL f1 =====
SF01    400.1324710 MHz
NUC1     1H
P1       9.70 usec
SI       65536
SF       400.1300422 MHz
WDW      EM
SSB      0
LB       0.30 Hz
GB       0
PC       1.00
  
```

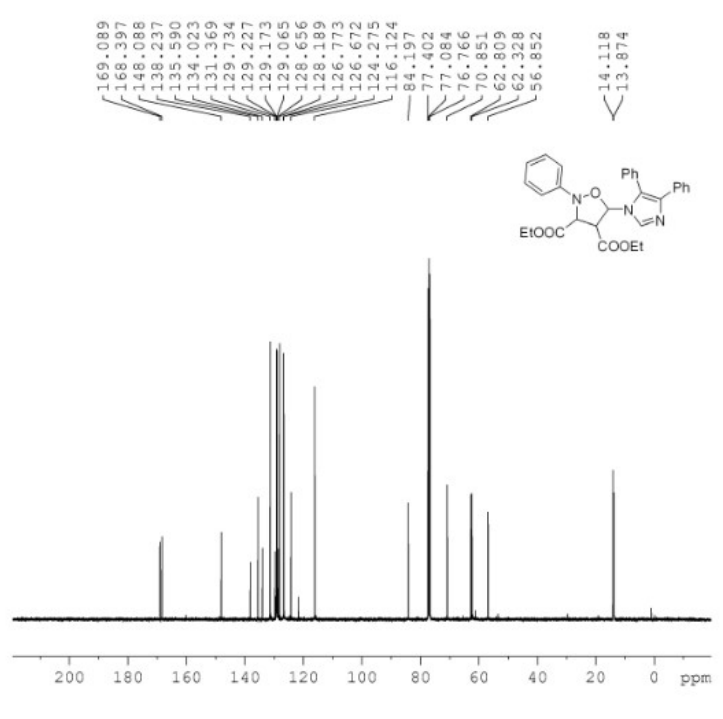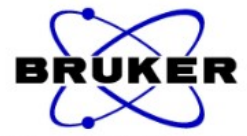

```

NAME      2017-03-27 tyut-lix
EXPNO    11
PROCNO   1
Date_    20170328
Time     0.00
INSTRUM  spect
PROBHD   5 mm PABBO BB/
PULPROG  zgpg30
TD       65536
SOLVENT  CDCl3
NS       1024
DS       4
SWH      24038.461 Hz
FIDRES   0.366798 Hz
AQ       1.3631988 sec
RG       185.43
DW       20.800 usec
DE       6.50 usec
TE       295.7 K
D1       2.00000000 sec
D11      0.03000000 sec
TD0      1

===== CHANNEL f1 =====
SF01    100.6228293 MHz
NUC1    13C
P1       9.50 usec
SI       32768
SF       100.6127690 MHz
WDW      EM
SSB      0
LB       1.00 Hz
GB       0
PC       1.40
  
```

8g

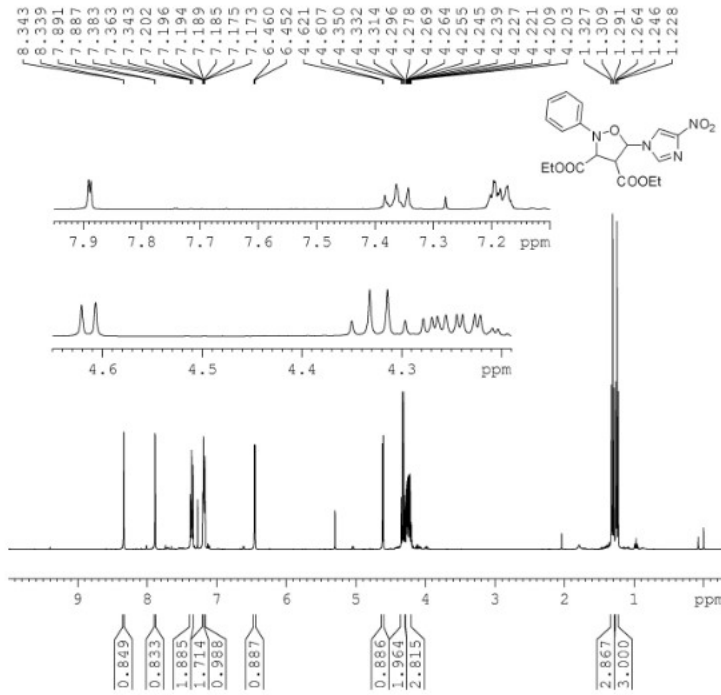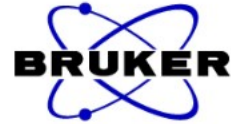

NAME 2017-03-27 tyut-lix  
 EXPNO 10  
 PROCNO 1  
 Date\_ 20170328  
 Time 5.19  
 INSTRUM spect  
 PROBHD 5 mm PABBO BB/  
 PULPROG zg30  
 TD 65536  
 SOLVENT CDCl3  
 NS 16  
 DS 2  
 SWH 8012.820 Hz  
 FIDRES 0.122266 Hz  
 AQ 4.0894966 sec  
 RG 34.32  
 DW 62.400 usec  
 DE 6.50 usec  
 TE 294.1 K  
 D1 1.0000000 sec  
 TD0 1

----- CHANNEL f1 -----  
 SFO1 400.1324710 MHz  
 NUC1 1H  
 P1 9.70 usec  
 SI 65536  
 SF 400.1300020 MHz  
 WDW EM  
 SSB 0  
 LB 0.30 Hz  
 GB 0  
 PC 1.00

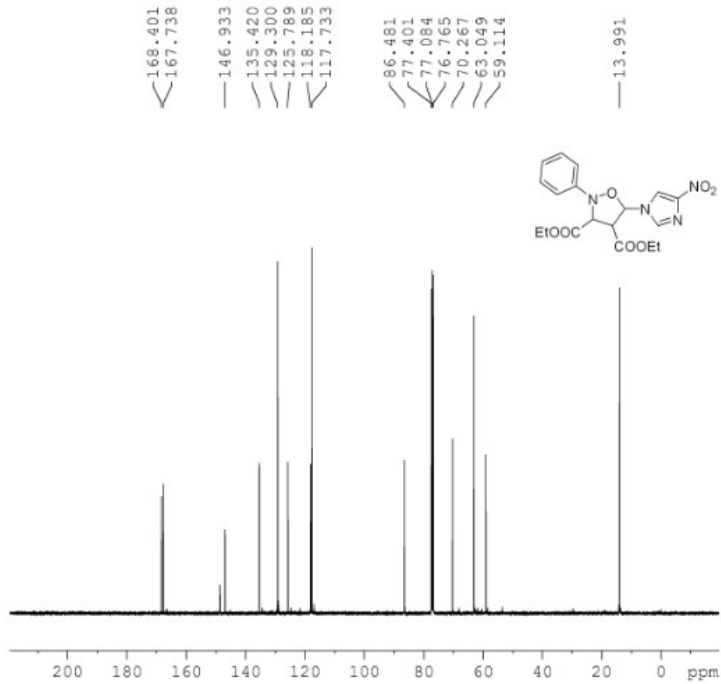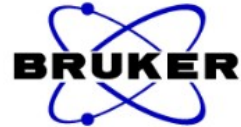

NAME 2017-03-27 tyut-lix  
 EXPNO 11  
 PROCNO 1  
 Date\_ 20170328  
 Time 6.18  
 INSTRUM spect  
 PROBHD 5 mm PABBO BB/  
 PULPROG zgpg30  
 TD 65536  
 SOLVENT CDCl3  
 NS 1024  
 DS 4  
 SWH 24038.461 Hz  
 FIDRES 0.366798 Hz  
 AQ 1.3631988 sec  
 RG 185.43  
 DW 20.800 usec  
 DE 6.50 usec  
 TE 294.7 K  
 D1 2.0000000 sec  
 D11 0.0300000 sec  
 TD0 1

===== CHANNEL f1 =====  
 SFO1 100.6228293 MHz  
 NUC1 13C  
 P1 9.50 usec  
 SI 32768  
 SF 100.6127690 MHz  
 WDW EM  
 SSB 0  
 LB 1.00 Hz  
 GB 0  
 PC 1.40

8h

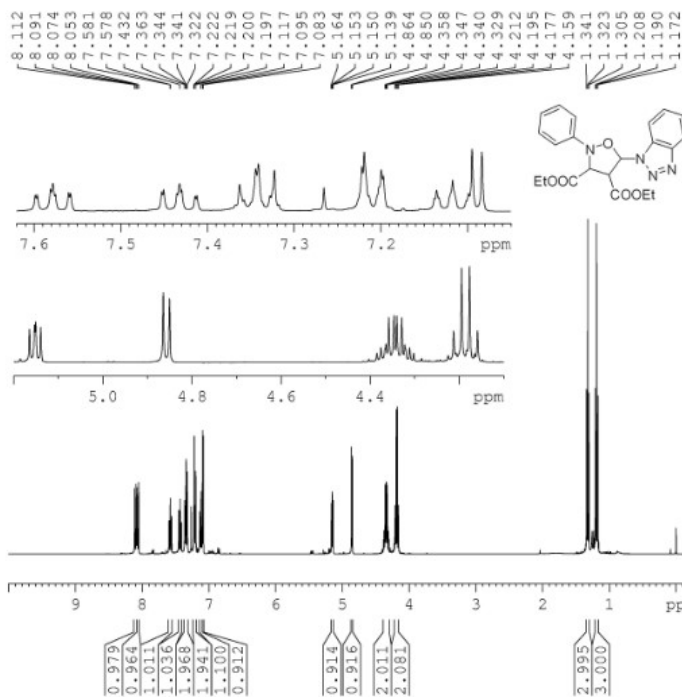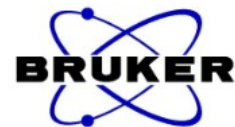

```

NAME      2017-03-23 tyut-lix
EXPNO    10
PROCNO   1
Date_    20170324
Time     0.04
INSTRUM  spect
PROBHD   5 mm PABBO BB/
PULPROG  zg30
ID       65536
SOLVENT  CDCl3
NS       16
DS       2
SWH      8012.820 Hz
FIDRES   0.122266 Hz
AQ       4.0894966 sec
RG       34.32
DW       62.400 usec
DE       6.50 usec
TE       295.8 K
D1       1.00000000 sec
TD0      1

===== CHANNEL f1 =====
SF01    400.1324710 MHz
NUC1     1H
P1       9.70 usec
SI       65536
SF       400.1300076 MHz
WDW      EM
SSB      0
LB       0.30 Hz
GB       0
PC       1.00
  
```

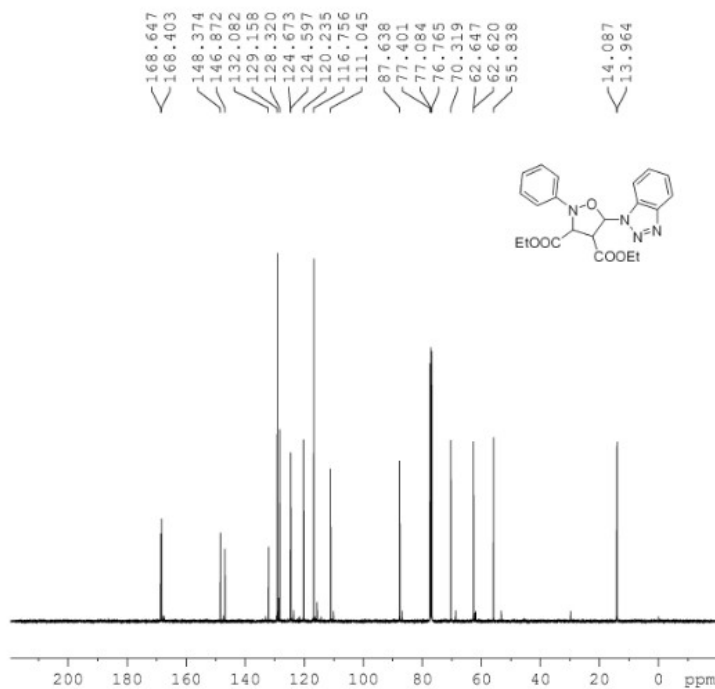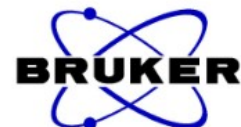

```

NAME      2017-03-23 tyut-lix
EXPNO    11
PROCNO   1
Date_    20170324
Time     1.03
INSTRUM  spect
PROBHD   5 mm PABBO BB/
PULPROG  zgpg30
TD       65536
SOLVENT  CDCl3
NS       1024
DS       4
SWH      24038.461 Hz
FIDRES   0.366798 Hz
AQ       1.3631988 sec
RG       185.43
DW       20.800 usec
DE       6.50 usec
TE       296.5 K
D1       2.00000000 sec
D11      0.03000000 sec
TD0      1

===== CHANNEL f1 =====
SF01    100.6228293 MHz
NUC1     13C
P1       9.50 usec
SI       32768
SF       100.6127690 MHz
WDW      EM
SSB      0
LB       1.00 Hz
GB       0
PC       1.40
  
```

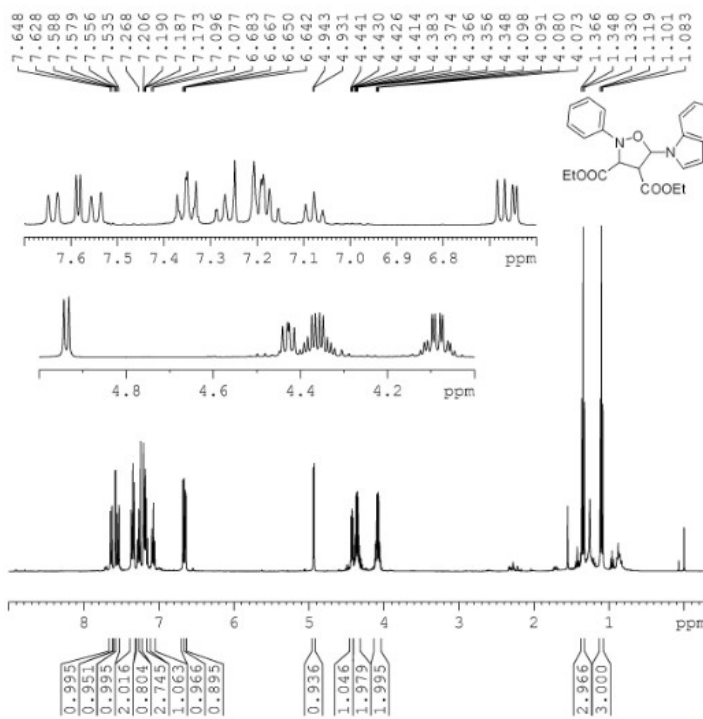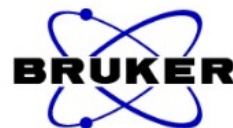

NAME 2017-04-19 tyut-lx-  
EXPNO 10  
PROCNO 1  
Date\_ 20170419  
Time 21.16  
INSTRUM spect  
PROBHD 5 mm PABBO BB/  
PULPROG zg30  
TD 65536  
SOLVENT CDC13  
NS 16  
DS 2  
SWH 8012.820 Hz  
FIDRES 0.122266 Hz  
AQ 4.0894966 sec  
RG 57.76  
DW 62.400 usec  
DE 6.50 usec  
TE 297.4 K  
D1 1.00000000 sec  
TD0 1

===== CHANNEL f1 =====  
SF01 400.1324710 MHz  
NUC1 1H  
P1 9.70 usec  
SI 65536  
SF 400.1300150 MHz  
WDW EM  
SSB 0  
LB 0.30 Hz  
GB 0  
PC 1.00

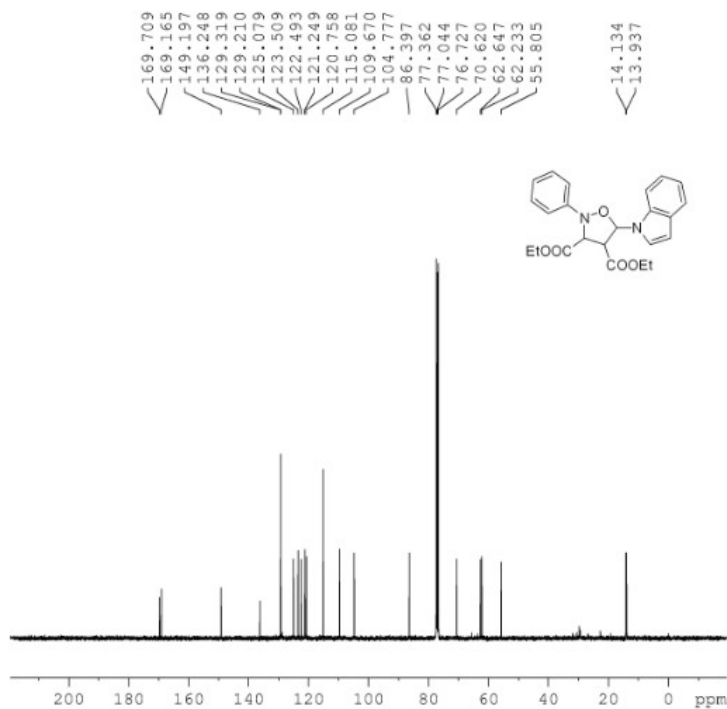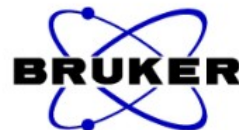

NAME 2017-04-19 tyut-lx-  
EXPNO 10  
PROCNO 1  
Date\_ 20170420  
Time 11.12  
INSTRUM spect  
PROBHD 5 mm PABBO BB/  
PULPROG zgpg30  
TD 65536  
SOLVENT CDC13  
NS 1024  
DS 4  
SWH 24038.461 Hz  
FIDRES 0.366798 Hz  
AQ 1.3631988 sec  
RG 185.43  
DW 20.800 usec  
DE 6.50 usec  
TE 297.7 K  
D1 2.00000000 sec  
D11 0.03000000 sec  
TD0 1

===== CHANNEL f1 =====  
SF01 100.6228293 MHz  
NUC1 13C  
P1 9.50 usec  
SI 32768  
SF 100.6127690 MHz  
WDW EM  
SSB 0  
LB 1.00 Hz  
GB 0  
PC 1.40



### 13. <sup>1</sup>H-NMR and <sup>13</sup>C-NMR spectra of products 11

11a

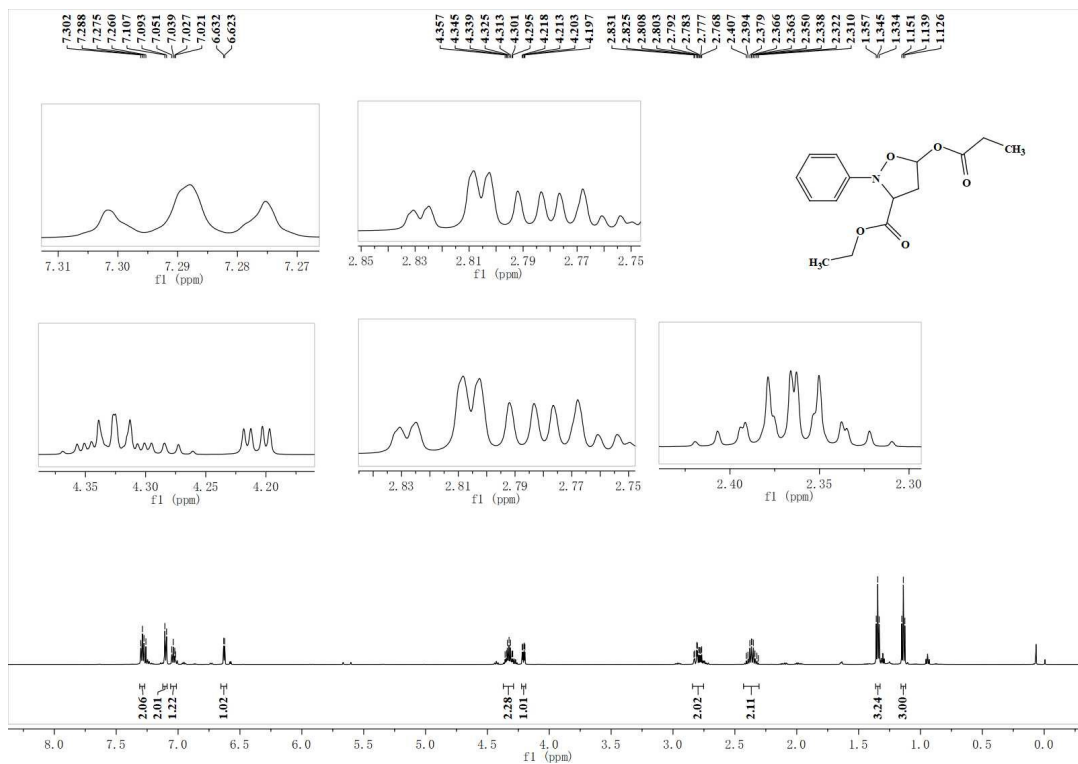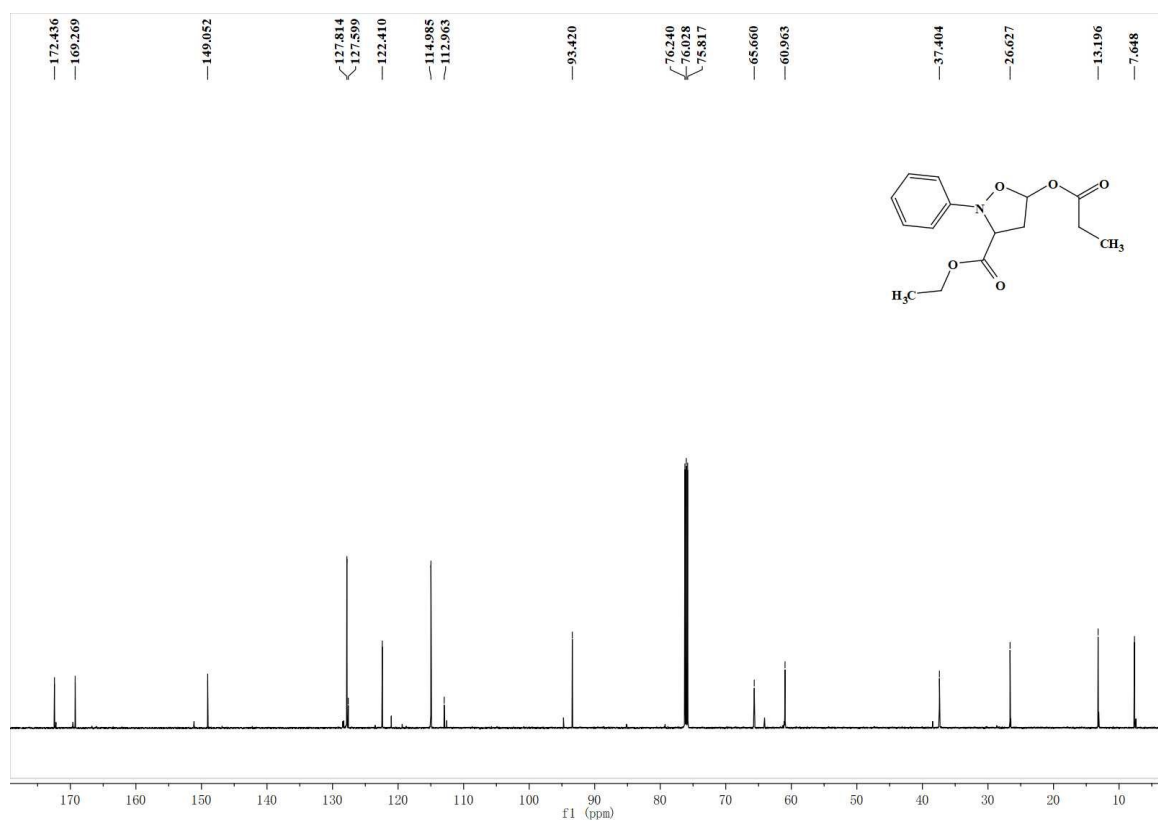

11b

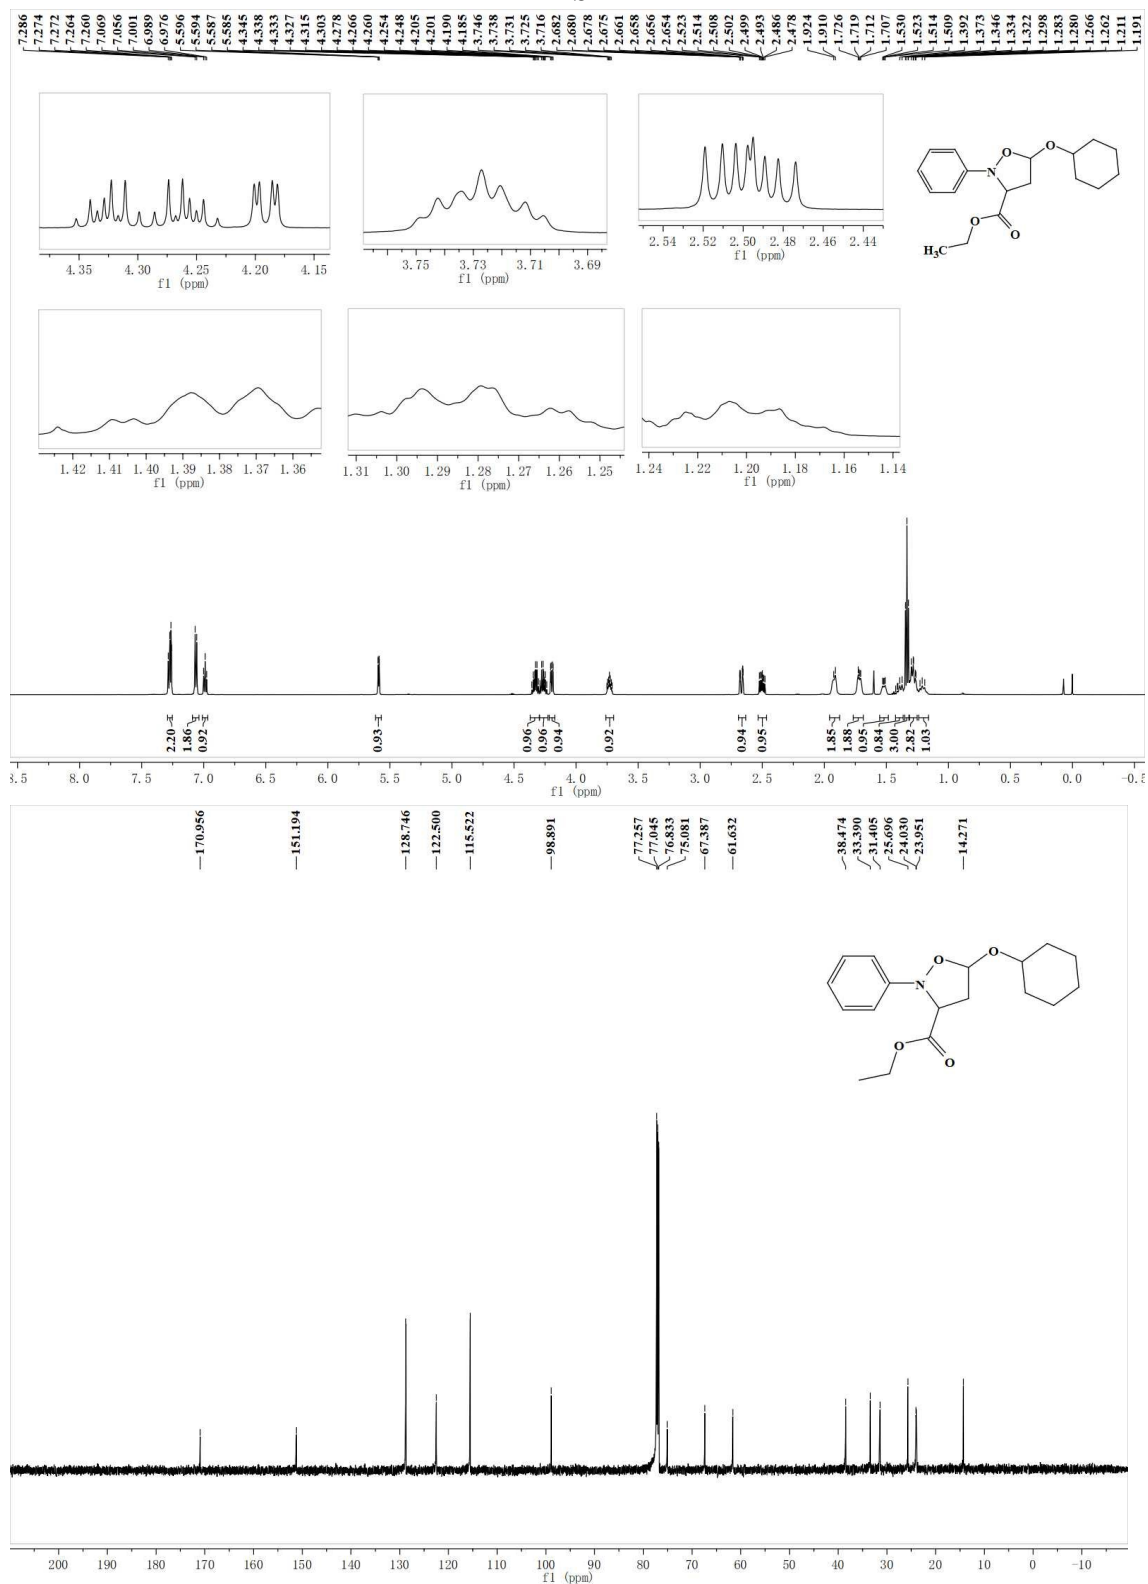

Supplement: d3nj05276a1.pdf [file d3nj05276a1.pdf]
